# Supplementary material for: Rapid ecosystem-scale consequences of acute deoxygenation on a Caribbean coral reef
Source: Nat Commun. 2021 Jul 26;12:4522. doi: 10.1038/s41467-021-24777-3 (PMC8313580; doi:10.1038/s41467-021-24777-3)
Supplement: Supplementary file 5 — Supplementary Dataset 2 [file 41467_2021_24777_MOESM5_ESM.csv]

Supplementary Data 2. KEGG module estimations for MAGs.
Rapid ecosystem-scale consequences of acute deoxygenation on a Caribbean coral reef
Maggie D. Johnson, Jarrod J. Scott, Matthieu Leray, Noelle Lucey, Lucia M. Rodriguez Bravo, William L. Wied, Andrew H. Altieri
unique_id	genome_name	kegg_module	module_name	module_class	module_category	module_subcategory	module_definition	module_completeness	module_is_complete	kofam_hits_in_module	gene_caller_ids_in_module	warnings
0	WATER_MAG_00001	M00001	Glycolysis (Embden-Meyerhof pathway), glucose => pyruvate	Pathway modules	Carbohydrate metabolism	Central carbohydrate metabolism	(K00844,K12407,K00845,K00886,K08074,K00918) (K01810,K06859,K13810,K15916) (K00850,K16370,K21071,K00918) (K01623,K01624,K11645,K16305,K16306) K01803 ((K00134,K00150) K00927,K11389) (K01834,K15633,K15634,K15635) K01689 (K00873,K12406)	0.9	TRUE	K00134,K00873,K01803,K00845,K01689,K15633,K01624,K00927,K01810	285,273,260,533,474,000,000,000,000,000,000,000,000,000,000,000,000,000,000	None
1	WATER_MAG_00001	M00002	Glycolysis, core module involving three-carbon compounds	Pathway modules	Carbohydrate metabolism	Central carbohydrate metabolism	K01803 ((K00134,K00150) K00927,K11389) (K01834,K15633,K15634,K15635) K01689 (K00873,K12406)	1	TRUE	K00134,K00873,K01803,K01689,K15633,K00927	2,852,732,605,334,740,000,000,000,000,000,000	None
2	WATER_MAG_00001	M00003	Gluconeogenesis, oxaloacetate => fructose-6P	Pathway modules	Carbohydrate metabolism	Central carbohydrate metabolism	(K01596,K01610) K01689 (K01834,K15633,K15634,K15635) K00927 (K00134,K00150) K01803 ((K01623,K01624,K11645) (K03841,K02446,K11532,K01086,K04041),K01622)	0.75	TRUE	K00134,K01803,K01689,K15633,K01624,K00927	2,852,733,474,100,310,000,000,000,000,000,000	None
3	WATER_MAG_00001	M00307	Pyruvate oxidation, pyruvate => acetyl-CoA	Pathway modules	Carbohydrate metabolism	Central carbohydrate metabolism	((K00163,K00161+K00162)+K00627+K00382-K13997),K00169+K00170+K00171+(K00172,K00189),K03737	0.75	TRUE	K00382,K00161,K00162	31,123,311,348,975	None
4	WATER_MAG_00001	M00009	Citrate cycle (TCA cycle, Krebs cycle)	Pathway modules	Carbohydrate metabolism	Central carbohydrate metabolism	(K01647,K05942) (K01681,K01682) (K00031,K00030) (K00164+K00658+K00382,K00174+K00175-K00177-K00176) (K01902+K01903,K01899+K01900,K18118) (K00234+K00235+K00236+K00237,K00239+K00240+K00241-(K00242,K18859,K18860),K00244+K00245+K00246-K00247) (K01676,K01679,K01677+K01678) (K00026,K00025,K00024,K00116)	0.75	TRUE	K00382,K01647,K00116,K00240,K00241,K01682,K00031,K01679	3,112,362,954,514,760,000,000,000,000,000,000,000,000,000	None
5	WATER_MAG_00001	M00010	Citrate cycle, first carbon oxidation, oxaloacetate => 2-oxoglutarate	Pathway modules	Carbohydrate metabolism	Central carbohydrate metabolism	(K01647,K05942) (K01681,K01682) (K00031,K00030)	1	TRUE	K01647,K01682,K00031	62,954,642,413,190	None
6	WATER_MAG_00001	M00011	Citrate cycle, second carbon oxidation, 2-oxoglutarate => oxaloacetate	Pathway modules	Carbohydrate metabolism	Central carbohydrate metabolism	(K00164+K00658+K00382,K00174+K00175-K00177-K00176) (K01902+K01903,K01899+K01900,K18118) (K00234+K00235+K00236+K00237,K00239+K00240+K00241-(K00242,K18859,K18860),K00244+K00245+K00246-K00247) (K01676,K01679,K01677+K01678) (K00026,K00025,K00024,K00116)	0.6	FALSE	K00382,K00116,K00240,K00241,K01679	31,123,514,761,027,600,000,000,000,000	None
7	WATER_MAG_00001	M00004	Pentose phosphate pathway (Pentose phosphate cycle)	Pathway modules	Carbohydrate metabolism	Central carbohydrate metabolism	(K13937,((K00036,K19243) (K01057,K07404))) K00033 K01783 (K01807,K01808) K00615 K00616 (K01810,K06859,K13810,K15916)	1	TRUE	K00033,K00615,K01783,K01807,K00036,K01057,K00616,K01810	354,033,014,331,633,000,000,000,000,000,000,000,000,000,000,000,000,000,000,000,000	None
8	WATER_MAG_00001	M00006	Pentose phosphate pathway, oxidative phase, glucose 6P => ribulose 5P	Pathway modules	Carbohydrate metabolism	Central carbohydrate metabolism	(K13937,((K00036,K19243) (K01057,K07404))) K00033	1	TRUE	K00033,K00036,K01057	3,540,318,454,196,040,000,000,000	None
9	WATER_MAG_00001	M00007	Pentose phosphate pathway, non-oxidative phase, fructose 6P => ribose 5P	Pathway modules	Carbohydrate metabolism	Central carbohydrate metabolism	K00615 (K00616,K13810) K01783 (K01807,K01808)	1	TRUE	K00615,K01783,K01807,K00616	301,433,163,327,563,000,000,000,000,000	None
10	WATER_MAG_00001	M00580	Pentose phosphate pathway, archaea, fructose 6P => ribose 5P	Pathway modules	Carbohydrate metabolism	Central carbohydrate metabolism	(K08094 (K08093,K13812),K13831) K01807	0.5	FALSE	K01807	39087	None
11	WATER_MAG_00001	M00005	PRPP biosynthesis, ribose 5P => PRPP	Pathway modules	Carbohydrate metabolism	Central carbohydrate metabolism	K00948	1	TRUE	K00948	41266	None
12	WATER_MAG_00001	M00008	Entner-Doudoroff pathway, glucose-6P => glyceraldehyde-3P + pyruvate	Pathway modules	Carbohydrate metabolism	Central carbohydrate metabolism	K00036 (K01057,K07404) K01690 K01625	0.75	TRUE	K00036,K01057,K01625	18,454,196,043,540,200,000	None
13	WATER_MAG_00001	M00308	Semi-phosphorylative Entner-Doudoroff pathway, gluconate => glycerate-3P	Pathway modules	Carbohydrate metabolism	Central carbohydrate metabolism	K05308 K00874 K01625 (K00134 K00927,K00131,K18978)	0.6	FALSE	K00134,K00927,K01625	28,527,100,311,864,400,000	None
14	WATER_MAG_00001	M00631	D-Galacturonate degradation (bacteria), D-galacturonate => pyruvate + D-glyceraldehyde 3P	Pathway modules	Carbohydrate metabolism	Other carbohydrate metabolism	K01812 K00041 (K01685,K16849+K16850) K00874 (K01625,K17463)	0.2	FALSE	K01625	40142	None
15	WATER_MAG_00001	M00061	D-Glucuronate degradation, D-glucuronate => pyruvate + D-glyceraldehyde 3P	Pathway modules	Carbohydrate metabolism	Other carbohydrate metabolism	K01812 K00040 (K01686,K08323) K00874 (K01625,K17463)	0.2	FALSE	K01625	40142	None
16	WATER_MAG_00001	M00552	D-galactonate degradation, De Ley-Doudoroff pathway, D-galactonate => glycerate-3P	Pathway modules	Carbohydrate metabolism	Other carbohydrate metabolism	K01684 K00883 K01631 K00134 K00927	0.4	FALSE	K00134,K00927	285,271,003,118,644	None
17	WATER_MAG_00001	M00854	Glycogen biosynthesis, glucose-1P => glycogen/starch	Pathway modules	Carbohydrate metabolism	Other carbohydrate metabolism	(K00963 (K00693+K00750,K16150,K16153,K13679,K20812)),(K00975 (K00703,K13679,K20812)) (K00700,K16149)	1	TRUE	K00975,K00700,K00703,K16149	2,756,035,404,524,690,000,000,000	None
18	WATER_MAG_00001	M00855	Glycogen degradation, glycogen => glucose-6P	Pathway modules	Carbohydrate metabolism	Other carbohydrate metabolism	(K00688,K16153) (K01196,((K00705,K22451) (K02438,K01200))) (K15779,K01835,K15778)	0.5	FALSE	K00688,K00705	402,463,896,714,146	None
19	WATER_MAG_00001	M00565	Trehalose biosynthesis, D-glucose 1P => trehalose	Pathway modules	Carbohydrate metabolism	Other carbohydrate metabolism	K00975 K00703 (K00700,K16149) K01214 K06044 K01236	0.5	FALSE	K00975,K00700,K00703,K16149	2,756,035,404,524,690,000,000,000	None
20	WATER_MAG_00001	M00549	Nucleotide sugar biosynthesis, glucose => UDP-glucose	Pathway modules	Carbohydrate metabolism	Other carbohydrate metabolism	(K00844,K00845,K12407,K00886) (K01835,K15779,K15778) (K00963,K12447)	0.333333333	FALSE	K00845	4,379,658,181	None
21	WATER_MAG_00001	M00892	UDP-N-acetyl-D-glucosamine biosynthesis, eukaryotes, glucose => UDP-GlcNAc	Pathway modules	Carbohydrate metabolism	Other carbohydrate metabolism	(K00844,K12407,K00845) K01810 K00820 K00621 K01836 K00972	0.5	FALSE	K00845,K01810,K00820	43,796,880,127,101,200,000,000	None
22	WATER_MAG_00001	M00909	UDP-N-acetyl-D-glucosamine biosynthesis, prokaryotes, glucose => UDP-GlcNAc	Pathway modules	Carbohydrate metabolism	Other carbohydrate metabolism	K00845 (K01810,K13810,K15916) K00820 K03431 K04042	1	TRUE	K03431,K00845,K04042,K01810,K00820	57,966,437,968,208,800,000,000,000,000,000	None
23	WATER_MAG_00001	M00012	Glyoxylate cycle	Pathway modules	Carbohydrate metabolism	Other carbohydrate metabolism	K01647 (K01681,K01682) K01637 (K01638,K19282) (K00026,K00025,K00024)	0.4	FALSE	K01647,K01682	629,546,424	None
24	WATER_MAG_00001	M00740	Methylaspartate cycle	Pathway modules	Carbohydrate metabolism	Other carbohydrate metabolism	K01647 K01681 K00031 K00261 K19268+K01846 K04835 K19280 K14449 K19281 K19282 K00024	0.181818182	FALSE	K01647,K00031	6,295,413,190	None
25	WATER_MAG_00001	M00532	Photorespiration	Pathway modules	Carbohydrate metabolism	Other carbohydrate metabolism	(K01601-K01602) K19269 K11517 K03781 K14272 K00600 K00830 (K15893,K15919) K15918 K00281+K00605+K00382+K02437	0.5	FALSE	K15918,K02437,K00382,K00600,K01601,K01602,K00605,K00830,K00281	34,067,414,773,112,300,000,000,000,000,000,000,000,000,000,000,000,000,000	None
26	WATER_MAG_00001	M00131	Inositol phosphate metabolism, Ins(1,3,4,5)P4 => Ins(1,3,4)P3 => myo-inositol	Pathway modules	Carbohydrate metabolism	Other carbohydrate metabolism	K01106 K01107 K01109 K01092	0.25	FALSE	K01092	12758	None
27	WATER_MAG_00001	M00165	Reductive pentose phosphate cycle (Calvin cycle)	Pathway modules	Energy metabolism	Carbon fixation	K00855 (K01601-K01602) K00927 (K05298,K00150,K00134) (K01623,K01624) (K03841,K02446,K11532,K01086) K00615 (K01623,K01624) (K01100,K11532,K01086) K00615 (K01807,K01808)	0.818181818	TRUE	K00134,K00615,K00855,K01807,K01601,K01602,K01624,K00927	28,527,301,433,163,300,000,000,000,000,000,000,000,000,000,000,000,000	No KOfam profile for M00165
28	WATER_MAG_00001	M00166	Reductive pentose phosphate cycle, ribulose-5P => glyceraldehyde-3P	Pathway modules	Energy metabolism	Carbon fixation	K00855 (K01601-K01602) K00927 (K05298,K00150,K00134)	1	TRUE	K00134,K00855,K01601,K01602,K00927	2,852,740,073,100,310,000,000,000,000	None
29	WATER_MAG_00001	M00167	Reductive pentose phosphate cycle, glyceraldehyde-3P => ribulose-5P	Pathway modules	Energy metabolism	Carbon fixation	(K01623,K01624) (K03841,K02446,K11532,K01086) K00615 (K01623,K01624) (K01100,K11532,K01086) K00615 (K01807,K01808)	0.714285714	FALSE	K00615,K01807,K01624	3,014,331,633,390,870,000,000,000	None
30	WATER_MAG_00001	M00168	CAM (Crassulacean acid metabolism), dark	Pathway modules	Energy metabolism	Carbon fixation	K01595 (K00025,K00026,K00024)	0.5	FALSE	K01595	13954	None
31	WATER_MAG_00001	M00172	C4-dicarboxylic acid cycle, NADP - malic enzyme type	Pathway modules	Energy metabolism	Carbon fixation	K01595 K00051 K00029 K01006	0.25	FALSE	K01595	13954	None
32	WATER_MAG_00001	M00171	C4-dicarboxylic acid cycle, NAD - malic enzyme type	Pathway modules	Energy metabolism	Carbon fixation	K01595 K14454 K14455 (K00025,K00026) K00028 (K00814,K14272) K01006	0.142857143	FALSE	K01595	13954	None
33	WATER_MAG_00001	M00170	C4-dicarboxylic acid cycle, phosphoenolpyruvate carboxykinase type	Pathway modules	Energy metabolism	Carbon fixation	K01595 K14454 K14455 K01610	0.25	FALSE	K01595	13954	None
34	WATER_MAG_00001	M00173	Reductive citrate cycle (Arnon-Buchanan cycle)	Pathway modules	Energy metabolism	Carbon fixation	(K00169+K00170+K00171+K00172,K03737) ((K01007,K01006) K01595,K01959+K01960,K01958) K00024 (K01676,K01679,K01677+K01678) (K00239+K00240-K00241-K00242,K00244+K00245-K00246-K00247,K18556+K18557+K18558+K18559+K18560) (K01902+K01903) (K00174+K00175-K00177-K00176) K00031 (K01681,K01682) (K15230+K15231,K15232+K15233 K15234)	0.409090909	FALSE	K00240,K00241,K01682,K01595,K00031,K01679	10,276,102,786,424,100,000,000,000,000	No KOfam profile for M00173
35	WATER_MAG_00001	M00376	3-Hydroxypropionate bi-cycle	Pathway modules	Energy metabolism	Carbon fixation	(K02160+K01961+K01962+K01963) K14468 K14469 K15052 K05606 (K01847,K01848+K01849) (K14471+K14472) (K00239+K00240+K00241) K01679 K08691 K14449 K14470 K09709	0.185897436	FALSE	K00240,K00241,K02160,K01962,K01963,K01679	10,276,102,781,087,800,000,000,000,000	No KOfam profile for M00376
36	WATER_MAG_00001	M00374	Dicarboxylate-hydroxybutyrate cycle	Pathway modules	Energy metabolism	Carbon fixation	(K00169+K00170+K00171+K00172) K01007 K01595 K00024 (K01677+K01678) (K00239+K00240-K00241-K18860) (K01902+K01903) (K15038,K15017) K14465 (K14467,K18861) K14534 K15016 K00626	0.115384615	FALSE	K00240,K00241,K01595	102,761,027,813,954	None
37	WATER_MAG_00001	M00377	Reductive acetyl-CoA pathway (Wood-Ljungdahl pathway)	Pathway modules	Energy metabolism	Carbon fixation	K00198 K05299-K15022 K01938 K01491 K00297 K15023 K14138+K00197+K00194	0.285714286	FALSE	K01491,K00297	562,796,497	No KOfam profile for M00377
38	WATER_MAG_00001	M00567	Methanogenesis, CO2 => methane	Pathway modules	Energy metabolism	Methane metabolism	(K00200+K00201+K00202+K00203-K11261+(K00205,K11260,K00204)) K00672 K01499 (K00319,K13942) K00320 (K00577+K00578+K00579+K00580+K00581-K00582-K00583+K00584) (K00399+K00401+K00402) (K22480+K22481+K22482,K03388+K03389+K03390,K08264+K08265,K03388+K03389+K03390+K14127+(K14126+K14128,K22516+K00125))	0.025	FALSE	K00202	10071	None
39	WATER_MAG_00001	M00357	Methanogenesis, acetate => methane	Pathway modules	Energy metabolism	Methane metabolism	((K00925 K00625),K01895) (K00193+K00197+K00194) (K00577+K00578+K00579+K00580+K00581-K00582-K00583+K00584) (K00399+K00401+K00402) (K22480+K22481+K22482,K03388+K03389+K03390,K08264+K08265,K03388+K03389+K03390+K14127+(K14126+K14128,K22516+K00125))	0.2	FALSE	K01895	51455	None
40	WATER_MAG_00001	M00358	Coenzyme M biosynthesis	Pathway modules	Energy metabolism	Methane metabolism	K08097 K05979 K05884 K13039+K06034	0.25	FALSE	K05979	8212	None
41	WATER_MAG_00001	M00346	Formaldehyde assimilation, serine pathway	Pathway modules	Energy metabolism	Methane metabolism	K00600 K00830 K00018 K11529 K01689 K01595 K00024 K08692+K14067 K08691	0.444444444	FALSE	K00600,K01689,K00830,K01595	609,341,382,389,581,000,000,000	None
42	WATER_MAG_00001	M00345	Formaldehyde assimilation, ribulose monophosphate pathway	Pathway modules	Energy metabolism	Methane metabolism	(((K08093,K13812) K08094),K13831) (K00850,K16370) K01624	0.333333333	FALSE	K01624	10040	None
43	WATER_MAG_00001	M00344	Formaldehyde assimilation, xylulose monophosphate pathway	Pathway modules	Energy metabolism	Methane metabolism	K17100 K00863 K01624 K03841	0.25	FALSE	K01624	10040	None
44	WATER_MAG_00001	M00531	Assimilatory nitrate reduction, nitrate => ammonia	Pathway modules	Energy metabolism	Nitrogen metabolism	(K00367,K10534,K00372-K00360) (K00366,K17877)	0.5	FALSE	K00366	641,141,172	No KOfam profile for M00531
45	WATER_MAG_00001	M00176	Assimilatory sulfate reduction, sulfate => H2S	Pathway modules	Energy metabolism	Sulfur metabolism	(K13811,K00958+K00860,K00955+K00957,K00956+K00957+K00860) K00390 (K00380+K00381,K00392)	0.833333333	TRUE	K00958,K00392,K00390	401,444,439,618,804	No KOfam profile for M00176
46	WATER_MAG_00001	M00596	Dissimilatory sulfate reduction, sulfate => H2S	Pathway modules	Energy metabolism	Sulfur metabolism	K00958 (K00394+K00395) (K11180+K11181)	0.333333333	FALSE	K00958	40144	None
47	WATER_MAG_00001	M00161	Photosystem II	Pathway modules	Energy metabolism	Photosynthesis	K02703+K02706+K02705+K02704+K02707+K02708	1	TRUE	K02708,K02703,K02705,K02707,K02704,K02706	2,415,358,191,521,510,000,000,000,000,000,000	No KOfam profile for M00161
48	WATER_MAG_00001	M00163	Photosystem I	Pathway modules	Energy metabolism	Photosynthesis	K02689+K02690+K02691+K02692+K02693+K02694	1	TRUE	K02694,K02693,K02692,K02690,K02691,K02689	79,741,431,313,957,700,000,000,000	No KOfam profile for M00163
49	WATER_MAG_00001	M00144	NADH:quinone oxidoreductase, prokaryotes	Pathway modules	Energy metabolism	ATP synthesis	K00330+(K00331+K00332+K00333,K00331+K13378,K13380)+K00334+K00335+K00336+K00337+K00338+K00339+K00340+(K00341+K00342)+K00343	0.5	FALSE	K00337,K00340,K00343,K00339,K00330,K00341	6,295,364,458,530,100,000,000,000,000,000,000	None
50	WATER_MAG_00001	M00145	NAD(P)H:quinone oxidoreductase, chloroplasts and cyanobacteria	Pathway modules	Energy metabolism	ATP synthesis	K05574+K05582+K05581+K05579+K05572+K05580+K05578+K05576+K05577+K05575+K05573-K05583-K05584-K05585	1	TRUE	K05576,K05575,K05573,K05572,K05580,K05581,K05578,K05577,K05574,K05583,K05582,K05579,K05585,K05584	6,445,858,179,530,100,000,000,000,000,000,000,000,000,000,000,000,000,000,000,000,000,000,000,000,000,000	None
51	WATER_MAG_00001	M00149	Succinate dehydrogenase, prokaryotes	Pathway modules	Energy metabolism	ATP synthesis	K00241+(K00242,K18859,K18860)+K00239+K00240	0.5	FALSE	K00240,K00241	1,027,610,278	None
52	WATER_MAG_00001	M00162	Cytochrome b6f complex	Pathway modules	Energy metabolism	ATP synthesis	K02635+K02637+K02634+K02636+K02642+K02643+K03689+K02640	0.625	FALSE	K03689,K02637,K02635,K02634,K02636	32,597,268,883,094,700,000,000,000	None
53	WATER_MAG_00001	M00154	Cytochrome c oxidase	Pathway modules	Energy metabolism	ATP synthesis	(K02257+K02262+K02256+K02261+K02263+K02264+K02265+K02266+K02267+K02268+K02270-K02271+K02272-K02273+K02258+K02259+K02260)	0.133333333	FALSE	K02257,K02259	5,832,858,329	None
54	WATER_MAG_00001	M00155	Cytochrome c oxidase, prokaryotes	Pathway modules	Energy metabolism	ATP synthesis	K02275+(K02274+K02276,K15408)-K02277	1	TRUE	K02275,K02274,K02276	583,305,833,158,332	None
55	WATER_MAG_00001	M00157	F-type ATPase, prokaryotes and chloroplasts	Pathway modules	Energy metabolism	ATP synthesis	K02111+K02112+K02113+K02114+K02115+K02108+K02109+K02110	1	TRUE	K02109,K02108,K02111,K02110,K02113,K02115,K02112,K02114	3,430,034,301,342,980,000,000,000,000,000,000,000,000,000	None
56	WATER_MAG_00001	M00082	Fatty acid biosynthesis, initiation	Pathway modules	Lipid metabolism	Fatty acid metabolism	(K11262,(K02160+K01961,K11263)+(K01962+K01963,K18472)) (K00665,K00667+K00668,K11533,(K00645 (K00648,K18473)))	0.916666667	TRUE	K00645,K02160,K01962,K00648,K01963	4,694,910,878,374,710,000,000,000,000,000,000	None
57	WATER_MAG_00001	M00083	Fatty acid biosynthesis, elongation	Pathway modules	Lipid metabolism	Fatty acid metabolism	K00665,(K00667 K00668),K11533,((K00647,K09458) K00059 (K02372,K01716,K16363) (K00208,K02371,K10780,K00209))	0.75	TRUE	K02372,K00059,K00208	334,455,832,118,742	None
58	WATER_MAG_00001	M00873	Fatty acid biosynthesis in mitochondria, animals	Pathway modules	Lipid metabolism	Fatty acid metabolism	K18660 K03955+K00645 K09458 K11539+K13370 K22540 K07512	0.083333333	FALSE	K00645	469,491,662,918,877	None
59	WATER_MAG_00001	M00874	Fatty acid biosynthesis in mitochondria, fungi	Pathway modules	Lipid metabolism	Fatty acid metabolism	K11262 K03955+K00645 K09458 K00059 K22541 K07512	0.25	FALSE	K00645,K00059	46,949,583,211,662,900,000	None
60	WATER_MAG_00001	M00086	beta-Oxidation, acyl-CoA synthesis	Pathway modules	Lipid metabolism	Fatty acid metabolism	K01897,K15013	1	TRUE	K01897	52144	None
61	WATER_MAG_00001	M00089	Triacylglycerol biosynthesis	Pathway modules	Lipid metabolism	Lipid metabolism	(K00629,K13506,K13507,K00630,K13508) (K00655,K13509,K13523,K19007,K13513,K13517,K13519,K14674,K22831) (K01080,K15728,K18693) (K11155,K11160,K14456,K22848,K22849)	0.25	FALSE	K00655	1,663,049,562	None
62	WATER_MAG_00001	M00098	Acylglycerol degradation	Pathway modules	Lipid metabolism	Lipid metabolism	(K01046,K12298,K16816,K13534,K14073,K14074,K14075,K14076,K22283,K14452,K22284,K14674,K14675,K17900) K01054	0.5	FALSE	K01046	174,864,379,358,177	None
63	WATER_MAG_00001	M00093	Phosphatidylethanolamine (PE) biosynthesis, PA => PS => PE	Pathway modules	Lipid metabolism	Lipid metabolism	K00981 (K00998,K17103) K01613	0.333333333	FALSE	K00981	14138	None
64	WATER_MAG_00001	M00048	Inosine monophosphate biosynthesis, PRPP + glutamine => IMP	Pathway modules	Nucleotide metabolism	Purine metabolism	K00764 (K01945,K11787,K11788,K13713) (K00601,K11175,K08289,K11787,K01492) (K01952,(K23269+K23264+K23265),(K23270+K23265)) (K01933,K11787,K11788 (K01587,K11808,K01589 K01588)) (K01923,K01587,K13713) K01756 (K00602,(K01492,K06863 K11176))	1	TRUE	K01589,K00602,K23269,K23265,K01588,K23264,K01945,K11175,K01923,K01933,K00764,K08289,K01756	3,259,064,118,428,780,000,000,000,000,000,000,000,000,000,000,000,000,000,000,000,000,000	None
65	WATER_MAG_00001	M00049	Adenine ribonucleotide biosynthesis, IMP => ADP,ATP	Pathway modules	Nucleotide metabolism	Purine metabolism	K01939 K01756 (K00939,K18532,K18533,K00944) (K00940,K00873,K12406)	1	TRUE	K00873,K00940,K01939,K00939,K01756	32,605,270,955,953,600,000,000,000,000	None
66	WATER_MAG_00001	M00050	Guanine ribonucleotide biosynthesis IMP => GDP,GTP	Pathway modules	Nucleotide metabolism	Purine metabolism	K00088 K01951 K00942 (K00940,K18533,K00873,K12406)	1	TRUE	K00873,K00940,K01951,K00942,K00088	3,260,527,095,129,610,000,000,000,000,000,000	None
67	WATER_MAG_00001	M00051	Uridine monophosphate biosynthesis, glutamine (+ PRPP) => UMP	Pathway modules	Nucleotide metabolism	Pyrimidine metabolism	(K11540,(K11541 K01465),((K01954,K01955+K01956) (K00609+K00610,K00608) K01465)) (K00226,K00254,K17828) (K13421,K00762 K01591)	0.75	TRUE	K00254,K01956,K00609,K00762,K01465,K01955	32,751,353,555,509,700,000,000,000,000,000,000,000	None
68	WATER_MAG_00001	M00052	Pyrimidine ribonucleotide biosynthesis, UMP => UDP/UTP,CDP/CTP	Pathway modules	Nucleotide metabolism	Pyrimidine metabolism	(K13800,K13809,K09903) (K00940,K18533) K01937	1	TRUE	K00940,K01937,K09903	2,709,511,739,153,310,000	None
69	WATER_MAG_00001	M00053	Pyrimidine deoxyribonuleotide biosynthesis, CDP/CTP => dCDP/dCTP,dTDP/dTTP	Pathway modules	Nucleotide metabolism	Pyrimidine metabolism	(K00524,K00525+K00526,K10807+K10808) (K00940,K18533) (K00527,K21636) K01494 K01520 (K00560,K13998) K00943 K00940	0.625	FALSE	K00524,K00943,K00940,K01494	32,289,499,622,709,500,000,000,000,000	None
70	WATER_MAG_00001	M00020	Serine biosynthesis, glycerate-3P => serine	Pathway modules	Amino acid metabolism	Serine and threonine metabolism	K00058 K00831 (K01079,K02203,K22305)	0.666666667	FALSE	K00058,K22305	6,041,511,306	None
71	WATER_MAG_00001	M00018	Threonine biosynthesis, aspartate => homoserine => threonine	Pathway modules	Amino acid metabolism	Serine and threonine metabolism	(K00928,K12524,K12525,K12526) K00133 (K00003,K12524,K12525) (K00872,K02204,K02203) K01733	1	TRUE	K00872,K00133,K00003,K01733,K00928,K02204	5,818,036,311,144,610,000,000,000,000,000,000	None
72	WATER_MAG_00001	M00033	Ectoine biosynthesis, aspartate => ectoine	Pathway modules	Amino acid metabolism	Serine and threonine metabolism	K00928 K00133 K00836 K06718 K06720	0.4	FALSE	K00133,K00928	36,311,144,616,227	None
73	WATER_MAG_00001	M00021	Cysteine biosynthesis, serine => cysteine	Pathway modules	Amino acid metabolism	Cysteine and methionine metabolism	(K00640,K23304) (K01738,K13034,K17069)	0.5	FALSE	K01738,K17069	5,214,840,931	None
74	WATER_MAG_00001	M00609	Cysteine biosynthesis, methionine => cysteine	Pathway modules	Amino acid metabolism	Cysteine and methionine metabolism	K00789 K17462 K01243 K07173 K17216 K17217	0.333333333	FALSE	K00789,K01243	13,259,428	None
75	WATER_MAG_00001	M00017	Methionine biosynthesis, apartate => homoserine => methionine	Pathway modules	Amino acid metabolism	Cysteine and methionine metabolism	(K00928,K12524,K12525) K00133 (K00003,K12524,K12525) (K00651,K00641) K01739 (K01760,K14155) (K00548,K24042,K00549)	0.857142857	TRUE	K00651,K00133,K00548,K00003,K00928,K01739	4,093,236,311,295,870,000,000,000,000,000,000	None
76	WATER_MAG_00001	M00034	Methionine salvage pathway	Pathway modules	Amino acid metabolism	Cysteine and methionine metabolism	K00789 K01611 K00797 ((K01243,K01244) K00899,K00772) K08963 (K16054,K08964 (K09880,K08965 K08966)) K08967 (K00815,K08969,K23977,K00832,K00838)	0.888888889	TRUE	K08964,K08967,K01611,K09880,K08963,K00797,K00772,K00789,K01243	35,574,521,341,395,100,000,000,000,000,000,000,000,000	None
77	WATER_MAG_00001	M00035	Methionine degradation	Pathway modules	Amino acid metabolism	Cysteine and methionine metabolism	K00789 (K00558,K17398,K17399) K01251 (K01697,K10150)	0.5	FALSE	K01251,K00789	3,374,213,259	None
78	WATER_MAG_00001	M00368	Ethylene biosynthesis, methionine => ethylene	Pathway modules	Amino acid metabolism	Cysteine and methionine metabolism	K00789 (K01762,K20772) K05933	0.333333333	FALSE	K00789	13259	None
79	WATER_MAG_00001	M00019	Valine/isoleucine biosynthesis, pyruvate => valine / 2-oxobutanoate => isoleucine	Pathway modules	Amino acid metabolism	Branched-chain amino acid metabolism	K01652+(K01653,K11258) K00053 K01687 K00826	1	TRUE	K00053,K00826,K01687,K01652,K01653	394,032,958,619,601,000,000,000	None
80	WATER_MAG_00001	M00535	Isoleucine biosynthesis, pyruvate => 2-oxobutanoate	Pathway modules	Amino acid metabolism	Branched-chain amino acid metabolism	K09011 K01703+K01704 K00052	0.5	FALSE	K00052,K01703	4,007,422,016	None
81	WATER_MAG_00001	M00570	Isoleucine biosynthesis, threonine => 2-oxobutanoate => isoleucine	Pathway modules	Amino acid metabolism	Branched-chain amino acid metabolism	(K17989,K01754) K01652+(K01653,K11258) K00053 K01687 K00826	1	TRUE	K00053,K00826,K01687,K01652,K01653,K01754	3,940,329,586,196,010,000,000,000,000	None
82	WATER_MAG_00001	M00432	Leucine biosynthesis, 2-oxoisovalerate => 2-oxoisocaproate	Pathway modules	Amino acid metabolism	Branched-chain amino acid metabolism	K01649 (K01702,K01703+K01704) K00052	0.833333333	TRUE	K00052,K01703,K01649	400,742,201,610,132	None
83	WATER_MAG_00001	M00036	Leucine degradation, leucine => acetoacetate + acetyl-CoA	Pathway modules	Amino acid metabolism	Branched-chain amino acid metabolism	K00826 ((K00166+K00167,K11381)+K09699+K00382) (K00253,K00249) (K01968+K01969) (K05607,K13766) K01640	0.222222222	FALSE	K00382,K00826	3,112,329,586	None
84	WATER_MAG_00001	M00016	Lysine biosynthesis, succinyl-DAP pathway, aspartate => lysine	Pathway modules	Amino acid metabolism	Lysine metabolism	(K00928,K12524,K12525,K12526) K00133 K01714 K00215 K00674 (K00821,K14267) K01439 K01778 (K01586,K12526)	0.777777778	TRUE	K00133,K00215,K00821,K01714,K01586,K01778,K00928	363,115,856,231,119,000,000,000,000,000,000,000,000,000,000,000	None
85	WATER_MAG_00001	M00525	Lysine biosynthesis, acetyl-DAP pathway, aspartate => lysine	Pathway modules	Amino acid metabolism	Lysine metabolism	K00928 K00133 K01714 K00215 K05822 K00841 K05823 K01778 K01586	0.666666667	FALSE	K00133,K00215,K01714,K01586,K01778,K00928	3,631,158,562,144,610,000,000,000,000,000,000,000,000,000	None
86	WATER_MAG_00001	M00526	Lysine biosynthesis, DAP dehydrogenase pathway, aspartate => lysine	Pathway modules	Amino acid metabolism	Lysine metabolism	(K00928,K12524,K12525,K12526) K00133 K01714 K00215 K03340 (K01586,K12526)	0.833333333	TRUE	K00133,K00215,K01714,K01586,K00928	363,115,856,214,461,000,000,000,000,000,000,000,000	None
87	WATER_MAG_00001	M00527	Lysine biosynthesis, DAP aminotransferase pathway, aspartate => lysine	Pathway modules	Amino acid metabolism	Lysine metabolism	(K00928,K12524,K12525,K12526) K00133 K01714 K00215 K10206 K01778 (K01586,K12526)	1	TRUE	K00133,K00215,K10206,K01714,K01586,K01778,K00928	363,115,856,241,318,000,000,000,000,000,000,000,000,000,000,000	None
88	WATER_MAG_00001	M00032	Lysine degradation, lysine => saccharopine => acetoacetyl-CoA	Pathway modules	Amino acid metabolism	Lysine metabolism	K14157 K14085 K00825 (K15791+K00658+K00382) K00252 (K07514,(K07515,K07511) K00022)	0.055555556	FALSE	K00382	31123	None
89	WATER_MAG_00001	M00028	Ornithine biosynthesis, glutamate => ornithine	Pathway modules	Amino acid metabolism	Arginine and proline metabolism	(K00618,K00619,K14681,K14682,K00620,K22477,K22478) ((K00930,K22478) K00145,K12659) (K00818,K00821) (K01438,K14677,K00620)	1	TRUE	K00620,K00821,K00145,K00930	39,031,311,192,867,100	None
90	WATER_MAG_00001	M00844	Arginine biosynthesis, ornithine => arginine	Pathway modules	Amino acid metabolism	Arginine and proline metabolism	K00611 K01940 (K01755,K14681)	1	TRUE	K00611,K01755,K01940	59,436,374,573,876	None
91	WATER_MAG_00001	M00845	Arginine biosynthesis, glutamate => acetylcitrulline => arginine	Pathway modules	Amino acid metabolism	Arginine and proline metabolism	K22478 K00145 K00821 K09065 K01438 K01940 K01755	0.571428571	FALSE	K00821,K01755,K01940,K00145	31,119,374,573,876,200	None
92	WATER_MAG_00001	M00029	Urea cycle	Pathway modules	Amino acid metabolism	Arginine and proline metabolism	K01948 K00611 K01940 (K01755,K14681) K01476	0.6	FALSE	K00611,K01755,K01940	59,436,374,573,876	None
93	WATER_MAG_00001	M00015	Proline biosynthesis, glutamate => proline	Pathway modules	Amino acid metabolism	Arginine and proline metabolism	((K00931 K00147),K12657) K00286	1	TRUE	K00286,K00147,K00931	521,324,379,535,024	None
94	WATER_MAG_00001	M00133	Polyamine biosynthesis, arginine => agmatine => putrescine => spermidine	Pathway modules	Amino acid metabolism	Polyamine biosynthesis	(K01583,K01584,K01585,K02626) K01480 K01611 K00797	0.75	TRUE	K01611,K00797,K01480	1,395,122,572,258	None
95	WATER_MAG_00001	M00026	Histidine biosynthesis, PRPP => histidine	Pathway modules	Amino acid metabolism	Histidine metabolism	(K00765-K02502) (K01523 K01496,K11755,K14152) (K01814,K24017) (K02501+K02500,K01663) ((K01693 K00817 (K04486,K05602,K18649)),(K01089 K00817)) (K00013,K14152)	0.75	TRUE	K00765,K00013,K01693,K01496,K02501,K01814,K02500,K02502,K11755	63,444,390,881,874,100,000,000,000,000,000,000,000	None
96	WATER_MAG_00001	M00022	Shikimate pathway, phosphoenolpyruvate + erythrose-4P => chorismate	Pathway modules	Amino acid metabolism	Aromatic amino acid metabolism	(K01626,K03856,K13853) (((K01735,K13829) ((K03785,K03786) K00014,K13832)),K13830) ((K00891,K13829) (K00800,K24018),K13830) K01736	1	TRUE	K01736,K01735,K03786,K00800,K00014,K01626,K00891	40,140,325,883,609,600,000,000,000,000,000	None
97	WATER_MAG_00001	M00023	Tryptophan biosynthesis, chorismate => tryptophan	Pathway modules	Amino acid metabolism	Aromatic amino acid metabolism	(((K01657+K01658,K13503,K13501,K01656) K00766),K13497) (((K01817,K24017) (K01656,K01609)),K13498,K13501) (K01695+(K01696,K06001),K01694)	1	TRUE	K01658,K00766,K01609,K01657,K01695,K01817,K01696	4,731,435,354,311,240,000,000,000,000,000,000,000	None
98	WATER_MAG_00001	M00024	Phenylalanine biosynthesis, chorismate => phenylpyruvate => phenylalanine	Pathway modules	Amino acid metabolism	Aromatic amino acid metabolism	((K01850,K04092,K14187,K04093,K04516,K06208,K06209) (K01713,K04518,K05359),K14170) (K00832,K00838)	0.666666667	FALSE	K06208,K04518	6,388,441,313	None
99	WATER_MAG_00001	M00025	Tyrosine biosynthesis, chorismate => HPP => tyrosine	Pathway modules	Amino acid metabolism	Aromatic amino acid metabolism	(((K01850,K04092,K14170,K04093,K04516,K06208,K06209) (K04517,K00211)),K14187) (K00832,K00838)	0.666666667	FALSE	K06208,K04517	6,388,462,702	None
100	WATER_MAG_00001	M00936	Melatonin biosynthesis, plants, tryptophan => serotonin => melatonin	Pathway modules	Amino acid metabolism	Aromatic amino acid metabolism	K01593 K24541 K22450 (K22588,K13066)	0.25	FALSE	K22450	25,918,139,533,066,000,000	None
101	WATER_MAG_00001	M00118	Glutathione biosynthesis, glutamate => glutathione	Pathway modules	Amino acid metabolism	Other amino acid metabolism	(K11204+K11205,K01919) (K21456,K01920)	0.5	FALSE	K01920	49118	None
102	WATER_MAG_00001	M00060	KDO2-lipid A biosynthesis, Raetz pathway, LpxL-LpxM type	Pathway modules	Glycan metabolism	Lipopolysaccharide metabolism	K00677 K02535 K02536 (K03269,K09949) K00748 K00912 K02527 K02517 K02560	0.333333333	FALSE	K02536,K00748,K00677	40,075,350,252,521,000,000	None
103	WATER_MAG_00001	M00866	KDO2-lipid A biosynthesis, Raetz pathway, non-LpxL-LpxM type	Pathway modules	Glycan metabolism	Lipopolysaccharide metabolism	K00677 (K02535,K16363) K02536 (K03269,K09949) K00748 K00912 K02527 K02517 K09778	0.333333333	FALSE	K02536,K00748,K00677	40,075,350,252,521,000,000	None
104	WATER_MAG_00001	M00127	Thiamine biosynthesis, prokaryotes, AIR (+ DXP/tyrosine) => TMP/TPP	Pathway modules	Metabolism of cofactors and vitamins	Cofactor and vitamin metabolism	K03148+K03154 K03151 K03150 K03149 K03147 ((K00941 K00788),K14153,K21219) K00946	0.4375	FALSE	K00788,K00946,K03147,K03154	429,532,852,831,634,000,000,000	None
105	WATER_MAG_00001	M00895	Thiamine biosynthesis, prokaryotes, AIR (+ DXP/glycine) => TMP/TPP	Pathway modules	Metabolism of cofactors and vitamins	Cofactor and vitamin metabolism	K03148+K03154 K03151 K03153 K03149 K10810 K03147 K00941 K00788 K00946	0.5	FALSE	K00788,K00946,K03147,K03154,K03153	42,953,285,283,163,400,000,000,000,000	None
106	WATER_MAG_00001	M00896	Thiamine biosynthesis, archaea, AIR (+ NAD+) => TMP/TPP	Pathway modules	Metabolism of cofactors and vitamins	Cofactor and vitamin metabolism	K22699 K03147 (K00941 (K00788,K21220),K21219) K00946	0.6	FALSE	K00788,K00946,K03147	4,295,328,528,316,340,000	None
107	WATER_MAG_00001	M00897	Thiamine biosynthesis, plants, AIR (+ NAD+) => TMP/thiamine/TPP	Pathway modules	Metabolism of cofactors and vitamins	Cofactor and vitamin metabolism	K03146 K03147 K14153 K22911 K00949	0.2	FALSE	K03147	316,347,569	None
108	WATER_MAG_00001	M00899	Thiamine salvage pathway, HMP/HET => TMP	Pathway modules	Metabolism of cofactors and vitamins	Cofactor and vitamin metabolism	K00878 ((K00941 K00788),K14153,K21219)	0.333333333	FALSE	K00788	42953	None
109	WATER_MAG_00001	M00125	Riboflavin biosynthesis, plants and bacteria, GTP => riboflavin/FMN/FAD	Pathway modules	Metabolism of cofactors and vitamins	Cofactor and vitamin metabolism	(K01497,K14652) (K01498 K00082,K11752) (K22912,K20860,K20861,K20862,K21063,K21064) (K02858,K14652) K00794 K00793 (K20884 K22949,K11753)	0.857142857	TRUE	K00793,K00794,K11752,K11753,K14652,K01497	5,833,456,996,264,390,000,000,000,000	None
110	WATER_MAG_00001	M00911	Riboflavin biosynthesis, fungi, GTP => riboflavin/FMN/FAD	Pathway modules	Metabolism of cofactors and vitamins	Cofactor and vitamin metabolism	K01497 K14654 K14655 -- K02858 K00794 K00793 K00861 K00953	0.333333333	FALSE	K00793,K00794,K01497	5,833,456,996,287	'--' steps are assumed incomplete
111	WATER_MAG_00001	M00124	Pyridoxal-P biosynthesis, erythrose-4P => pyridoxal-P	Pathway modules	Metabolism of cofactors and vitamins	Cofactor and vitamin metabolism	K03472 K03473 K00831 K00097 K03474 K00275	0.166666667	FALSE	K03474	49563	None
112	WATER_MAG_00001	M00115	NAD biosynthesis, aspartate => quinolinate => NAD	Pathway modules	Metabolism of cofactors and vitamins	Cofactor and vitamin metabolism	(K00278,K06989) K03517 K00767 (K00969,K06210) (K01916,K01950)	0.8	TRUE	K00278,K00767,K03517,K00969	361,515,946,598,007,000	None
113	WATER_MAG_00001	M00912	NAD biosynthesis, tryptophan => quinolinate => NAD	Pathway modules	Metabolism of cofactors and vitamins	Cofactor and vitamin metabolism	(K00453,K00463) (K01432,K14263,K07130) K00486 K01556 K00452 K00767 (K00969,K06210) (K01916,K01950)	0.25	FALSE	K00767,K00969	594,657,188	None
114	WATER_MAG_00001	M00119	Pantothenate biosynthesis, valine/L-aspartate => pantothenate	Pathway modules	Metabolism of cofactors and vitamins	Cofactor and vitamin metabolism	K00826 K00606 K00077 K01579 (K01918,K13799)	0.6	FALSE	K13799,K01918,K00606,K00826	5,034,639,408,295,860,000,000,000	None
115	WATER_MAG_00001	M00913	Pantothenate biosynthesis, 2-oxoisovalerate/spermine => pantothenate	Pathway modules	Metabolism of cofactors and vitamins	Cofactor and vitamin metabolism	K00606 K00077 K13367 K00128 K01918	0.4	FALSE	K01918,K00606	50,346,394,081,397,400,000	None
116	WATER_MAG_00001	M00120	Coenzyme A biosynthesis, pantothenate => CoA	Pathway modules	Metabolism of cofactors and vitamins	Cofactor and vitamin metabolism	(K00867,K03525,K01947,K09680) ((K01922,K21977) K01598,K13038) (K02318,(K00954,K02201) K00859)	1	TRUE	K13038,K00954,K00859,K03525	401,472,751,222,717,000,000,000	None
117	WATER_MAG_00001	M00914	Coenzyme A biosynthesis, archaea, 2-oxoisovalerate => 4-phosphopantoate => CoA	Pathway modules	Metabolism of cofactors and vitamins	Cofactor and vitamin metabolism	K00606 K00077 K06982 K09722 K13038 K02201 K09735	0.285714286	FALSE	K13038,K00606	4,014,739,408	None
118	WATER_MAG_00001	M00572	Pimeloyl-ACP biosynthesis, BioC-BioH pathway, malonyl-ACP => pimeloyl-ACP	Pathway modules	Metabolism of cofactors and vitamins	Cofactor and vitamin metabolism	K02169 (K00647,K09458) K00059 K02372 K00208 (K02170,K09789,K19560,K19561)	0.666666667	FALSE	K02372,K00059,K00208,K19560	33,445,583,211,874,200,000	None
119	WATER_MAG_00001	M00123	Biotin biosynthesis, pimeloyl-ACP/CoA => biotin	Pathway modules	Metabolism of cofactors and vitamins	Cofactor and vitamin metabolism	K00652 ((K00833,K19563) K01935,K19562) K01012	0.75	TRUE	K01012,K01935,K00833	592,782,120,821,211	None
120	WATER_MAG_00001	M00573	Biotin biosynthesis, BioI pathway, long-chain-acyl-ACP => pimeloyl-ACP => biotin	Pathway modules	Metabolism of cofactors and vitamins	Cofactor and vitamin metabolism	K16593 K00652 K19563 K01935 K01012	0.4	FALSE	K01012,K01935	5,927,821,208	None
121	WATER_MAG_00001	M00577	Biotin biosynthesis, BioW pathway, pimelate => pimeloyl-CoA => biotin	Pathway modules	Metabolism of cofactors and vitamins	Cofactor and vitamin metabolism	K01906 K00652 (K00833,K19563) K01935 K01012	0.6	FALSE	K01012,K01935,K00833	592,782,120,821,211	None
122	WATER_MAG_00001	M00881	Lipoic acid biosynthesis, plants and bacteria, octanoyl-ACP => dihydrolipoyl-E2/H	Pathway modules	Metabolism of cofactors and vitamins	Cofactor and vitamin metabolism	K03801 K03644	1	TRUE	K03801,K03644	521,431,007,310,347	None
123	WATER_MAG_00001	M00882	Lipoic acid biosynthesis, eukaryotes, octanoyl-ACP => dihydrolipoyl-H	Pathway modules	Metabolism of cofactors and vitamins	Cofactor and vitamin metabolism	K23735 K03644	0.5	FALSE	K03644	1,007,310,347	None
124	WATER_MAG_00001	M00883	Lipoic acid biosynthesis, animals and bacteria, octanoyl-ACP => dihydrolipoyl-H => dihydrolipoyl-E2	Pathway modules	Metabolism of cofactors and vitamins	Cofactor and vitamin metabolism	(K23735,K23734) K03644 (K10105,K16869)	0.333333333	FALSE	K03644	1,007,310,347	None
125	WATER_MAG_00001	M00884	Lipoic acid biosynthesis, octanoyl-CoA => dihydrolipoyl-E2	Pathway modules	Metabolism of cofactors and vitamins	Cofactor and vitamin metabolism	K23750 K03644	0.5	FALSE	K03644	1,007,310,347	None
126	WATER_MAG_00001	M00126	Tetrahydrofolate biosynthesis, GTP => THF	Pathway modules	Metabolism of cofactors and vitamins	Cofactor and vitamin metabolism	(K01495,K09007,K22391) (K01077,K01113,(K08310,K19965)) ((K13939,(K13940,K01633 K00950) K00796),(K01633 K13941)) (K11754,K20457) (K00287,K13998)	0.428571429	FALSE	K00796,K01495,K01633	33,473,374,943,794	None
127	WATER_MAG_00001	M00840	Tetrahydrofolate biosynthesis, mediated by ribA and trpF, GTP => THF	Pathway modules	Metabolism of cofactors and vitamins	Cofactor and vitamin metabolism	K14652 K22100 -- K01633 K13941 K22099 K00287	0.285714286	FALSE	K14652,K01633	28,743,794	'--' steps are assumed incomplete
128	WATER_MAG_00001	M00841	Tetrahydrofolate biosynthesis, mediated by PTPS, GTP => THF	Pathway modules	Metabolism of cofactors and vitamins	Cofactor and vitamin metabolism	K01495 K22101 K13941 K11754 K13998	0.2	FALSE	K01495	3749	None
129	WATER_MAG_00001	M00842	Tetrahydrobiopterin biosynthesis, GTP => BH4	Pathway modules	Metabolism of cofactors and vitamins	Cofactor and vitamin metabolism	K01495 K01737 K00072	0.666666667	FALSE	K01737,K01495	2,106,260,623,749	None
130	WATER_MAG_00001	M00843	L-threo-Tetrahydrobiopterin biosynthesis, GTP => L-threo-BH4	Pathway modules	Metabolism of cofactors and vitamins	Cofactor and vitamin metabolism	K01495 K01737 K17745	0.666666667	FALSE	K01737,K01495	2,106,260,623,749	None
131	WATER_MAG_00001	M00880	Molybdenum cofactor biosynthesis, GTP => molybdenum cofactor	Pathway modules	Metabolism of cofactors and vitamins	Cofactor and vitamin metabolism	((K03639 K03637),K20967) (K03635,K21142) (((K03831,K03638) K03750),K15376)	0.6	FALSE	K03638,K03637,K03750	264,213,990,826,418	None
132	WATER_MAG_00001	M00140	C1-unit interconversion, prokaryotes	Pathway modules	Metabolism of cofactors and vitamins	Cofactor and vitamin metabolism	K00600 (K01491,(K00300 K01500)) K01938	0.666666667	FALSE	K01491,K00600	562,796,093,419,706	None
133	WATER_MAG_00001	M00141	C1-unit interconversion, eukaryotes	Pathway modules	Metabolism of cofactors and vitamins	Cofactor and vitamin metabolism	K00600 (K00288,(K13403 K13402))	0.5	FALSE	K00600	6,093,419,706	None
134	WATER_MAG_00001	M00846	Siroheme biosynthesis, glutamyl-tRNA => siroheme	Pathway modules	Metabolism of cofactors and vitamins	Cofactor and vitamin metabolism	K02492 K01845 K01698 K01749 (K01719,K13542,K13543) (K02302,(K00589,K02303,K02496,K13542,K13543)+K02304-K03794)	0.916666667	TRUE	K02492,K01698,K01845,K02303,K01749,K01719	2,756,125,989,324,070,000,000,000,000	None
135	WATER_MAG_00001	M00868	Heme biosynthesis, animals and fungi, glycine => heme	Pathway modules	Metabolism of cofactors and vitamins	Cofactor and vitamin metabolism	K00643 K01698 K01749 K01719 K01599 K00228 K00231 K01772	0.75	TRUE	K01599,K01698,K01772,K01749,K01719,K00228	524,702,598,978,047,000,000,000,000	None
136	WATER_MAG_00001	M00121	Heme biosynthesis, plants and bacteria, glutamate => heme	Pathway modules	Metabolism of cofactors and vitamins	Cofactor and vitamin metabolism	K01885 K02492 K01845 K01698 K01749 (K01719,K13542,K13543) K01599 (K00228,K02495) (K00230,K00231,K08973) K01772	1	TRUE	K08973,K01599,K02495,K02492,K01698,K01845,K01772,K01749,K01885,K01719,K00228	4,945,652,470,394,070,000,000,000,000,000,000,000,000,000,000,000,000,000	None
137	WATER_MAG_00001	M00926	Heme biosynthesis, bacteria, glutamyl-tRNA => coproporphyrin III => heme	Pathway modules	Metabolism of cofactors and vitamins	Cofactor and vitamin metabolism	K02492 K01845 K01698 K01749 (K01719,K13542) K01599 K00231 K01772 K00435	0.777777778	TRUE	K01599,K02492,K01698,K01845,K01772,K01749,K01719	52,470,275,612,598,900,000,000,000,000,000	None
138	WATER_MAG_00001	M00924	Cobalamin biosynthesis, anaerobic, uroporphyrinogen III => sirohydrochlorin => cobyrinate a,c-diamide	Pathway modules	Metabolism of cofactors and vitamins	Cofactor and vitamin metabolism	(K02302,(K02303,K13542) K02304) (K02190,K03795,K22011) K03394 (K05934,K13541,K21479) K05936 (K02189,K13541) K02188 K05895 (K02191 K03399,K00595) K06042 K02224	0.833333333	TRUE	K05895,K06042,K02188,K03795,K02303,K03394,K05936,K02224,K02189,K00595	59,539,588,123,720,400,000,000,000,000,000,000,000,000,000,000,000,000	None
139	WATER_MAG_00001	M00925	Cobalamin biosynthesis, aerobic, uroporphyrinogen III => precorrin 2 => cobyrinate a,c-diamide	Pathway modules	Metabolism of cofactors and vitamins	Cofactor and vitamin metabolism	(K02303,K13542) (K03394,K13540) K02229 (K05934,K13540,K13541) K05936 K02228 K05895 K00595 K06042 K02224 K02230+K09882+K09883	0.666666667	FALSE	K05895,K06042,K02303,K03394,K05936,K02224,K02230,K00595	5,953,958,812,264,220,000,000,000,000,000,000,000,000,000	None
140	WATER_MAG_00001	M00122	Cobalamin biosynthesis, cobyrinate a,c-diamide => cobalamin	Pathway modules	Metabolism of cofactors and vitamins	Cofactor and vitamin metabolism	(K00798,K19221) K02232 (K02225,K02227) K02231 K00768 (K02226,K22316) K02233	0.714285714	FALSE	K02231,K02227,K02233,K02232,K19221	23,893,394,025,123,500,000,000,000,000,000,000,000,000	None
141	WATER_MAG_00001	M00117	Ubiquinone biosynthesis, prokaryotes, chorismate (+ polyprenyl-PP) => ubiquinol	Pathway modules	Metabolism of cofactors and vitamins	Cofactor and vitamin metabolism	(K03181,K18240) K03179 (K03182+K03186) K18800 K00568 K03185 K03183 K03184 K00568	0.444444444	FALSE	K03186,K03179,K03182,K03181,K03185	7,222,798,682,115,310,000,000	None
142	WATER_MAG_00001	M00116	Menaquinone biosynthesis, chorismate (+ polyprenyl-PP) => menaquinol	Pathway modules	Metabolism of cofactors and vitamins	Cofactor and vitamin metabolism	K02552 K02551 K08680 K02549 K01911 K01661 K19222 K02548 K03183	0.333333333	FALSE	K02551,K01661,K02549	269,432,694,213,842	None
143	WATER_MAG_00001	M00932	Phylloquinone biosynthesis, chorismate (+ phytyl-PP) => phylloquinol	Pathway modules	Metabolism of cofactors and vitamins	Cofactor and vitamin metabolism	(K02552 K02551 K08680 K02549,K14759) (K01911,K14760) K01661 (K19222,K12073) K23094 K17872 K23095	0.6	FALSE	K02551,K01661,K23094,K23095,K12073,K02549	26,943,269,421,384,300,000,000,000,000	None
144	WATER_MAG_00001	M00112	Tocopherol/tocotorienol biosynthesis, homogentisate + phytyl/geranylgeranyl-PP => tocopherol/tocotorienol	Pathway modules	Metabolism of cofactors and vitamins	Cofactor and vitamin metabolism	K09833 (K12502,K18534) K09834 K05928	0.25	FALSE	K18534	41312	None
145	WATER_MAG_00001	M00096	C5 isoprenoid biosynthesis, non-mevalonate pathway	Pathway modules	Biosynthesis of terpenoids and polyketides	Terpenoid backbone biosynthesis	K01662 K00099 (K00991,K12506) K00919 (K01770,K12506) K03526 K03527 K01823	0.75	TRUE	K01770,K00991,K01662,K03526,K00099,K00919	4,294,758,318,476,410,000,000,000,000	None
146	WATER_MAG_00001	M00364	C10-C20 isoprenoid biosynthesis, bacteria	Pathway modules	Biosynthesis of terpenoids and polyketides	Terpenoid backbone biosynthesis	K01823 (K00795,K13789,K13787)	0.5	FALSE	K13789,K00795	41084	None
147	WATER_MAG_00001	M00366	C10-C20 isoprenoid biosynthesis, plants	Pathway modules	Biosynthesis of terpenoids and polyketides	Terpenoid backbone biosynthesis	K01823 K14066 K00787 K13789	0.25	FALSE	K13789	41084	None
148	WATER_MAG_00001	M00097	beta-Carotene biosynthesis, GGAP => beta-carotene	Pathway modules	Biosynthesis of terpenoids and polyketides	Plant terpenoid biosynthesis	K02291 K02293 K15744 K00514 K09835 K06443	1	TRUE	K02291,K02293,K09835,K06443,K15744,K00514	13,225,132,241,012,600,000,000,000,000,000	None
149	WATER_MAG_00001	M00827	C-1027 beta-amino acid moiety biosynthesis, tyrosine => 3-chloro-4,5-dihydroxy-beta-phenylalanyl-PCP	Pathway modules	Biosynthesis of terpenoids and polyketides	Enediyne biosynthesis	K21183 K21181 K21182 K16431 K21184 K21185	0.166666667	FALSE	K21185	27511	None
150	WATER_MAG_00001	M00832	Kedarcidin 2-aza-3-chloro-beta-tyrosine moiety biosynthesis, azatyrosine => 2-aza-3-chloro-beta-tyrosyl-PCP	Pathway modules	Biosynthesis of terpenoids and polyketides	Enediyne biosynthesis	K21183 K21227 K21228 K16431 K21185	0.2	FALSE	K21185	27511	No KOfam profile for K21227,No KOfam profile for K21228
151	WATER_MAG_00001	M00793	dTDP-L-rhamnose biosynthesis	Pathway modules	Biosynthesis of terpenoids and polyketides	Polyketide sugar unit biosynthesis	K00973 K01710 (K01790 K00067,K23987)	1	TRUE	K01790,K00067,K00973,K01710	5,458,954,588,983,120,000	None
152	WATER_MAG_00001	M00848	Aurachin biosynthesis, anthranilate => aurachin A	Pathway modules	Biosynthesis of other secondary metabolites	Biosynthesis of other antibiotics	K09460 K02078+K14245+K14246+K22798 K22799 K22800 K21272 K21271 K22801 K22802	0.03125	FALSE	K02078	4652	No KOfam profile for K09460,No KOfam profile for K14245,No KOfam profile for K14246,No KOfam profile for K22798,No KOfam profile for K22799,No KOfam profile for K22800,No KOfam profile for K21272,No KOfam profile for K21271,No KOfam profile for K22801,No KOfam profile for K22802
153	WATER_MAG_00001	M00627	beta-Lactam resistance, Bla system	Signature modules	Gene set	Drug resistance	K02172 K02171 (K18766,K17836)	0.333333333	FALSE	K17836	62,119,256,073,831	None
154	WATER_MAG_00001	M00651	Vancomycin resistance, D-Ala-D-Lac type	Signature modules	Gene set	Drug resistance	(K18345 K18344 K07260 K18346),(K18351 K18352 K18354 K18353) (K18347 K15739 K08641)	0.285714286	FALSE	K08641,K07260	443,956,687	No KOfam profile for K18354
155	WATER_MAG_00001	M00611	Oxygenic photosynthesis in plants and cyanobacteria	Signature modules	Module set	Metabolic capacity	(M00161,M00163) M00165	0.909090909	TRUE	K00134,K02708,K00615,K00855,K02703,K02705,K01807,K02707,K02694,K02693,K01601,K02692,K02690,K01602,K02691,K02689,K01624,K00927,K02704,K02706	28,527,241,533,014,300,000,000,000,000,000,000,000,000,000,000,000,000,000,000,000,000,000,000,000,000,000,000,000,000,000,000,000,000,000,000,000,000	No KOfam profile for M00161,No KOfam profile for M00163,No KOfam profile for M00165
156	WATER_MAG_00001	M00612	Anoxygenic photosynthesis in purple bacteria	Signature modules	Module set	Metabolic capacity	M00597 M00165	0.409090909	FALSE	K00134,K00615,K00855,K01807,K01601,K01602,K01624,K00927	28,527,301,433,163,300,000,000,000,000,000,000,000,000,000,000,000,000	No KOfam profile for M00165,No KOfam profile for M00597
157	WATER_MAG_00001	M00613	Anoxygenic photosynthesis in green nonsulfur bacteria	Signature modules	Module set	Metabolic capacity	M00597 M00376	0.092948718	FALSE	K00240,K00241,K02160,K01962,K01963,K01679	10,276,102,781,087,800,000,000,000,000	No KOfam profile for M00597,No KOfam profile for M00376
158	WATER_MAG_00001	M00614	Anoxygenic photosynthesis in green sulfur bacteria	Signature modules	Module set	Metabolic capacity	M00598 M00173	0.204545455	FALSE	K00240,K00241,K01682,K01595,K00031,K01679	10,276,102,786,424,100,000,000,000,000	No KOfam profile for M00598,No KOfam profile for M00173
159	WATER_MAG_00001	M00617	Methanogen	Signature modules	Module set	Metabolic capacity	M00567,M00357,M00356,M00563	0.2	FALSE	K01895,K00202	5,145,510,071	None
160	WATER_MAG_00001	M00618	Acetogen	Signature modules	Module set	Metabolic capacity	M00377 M00579	0.142857143	FALSE	K01491,K00297	562,796,497	No KOfam profile for M00377,No KOfam profile for M00579
161	WATER_MAG_00001	M00615	Nitrate assimilation	Signature modules	Module set	Metabolic capacity	(K02575,K15576+K15577+K15578-K15579) M00531	0.75	TRUE	K02575,K00366	39,913,641,141,172	No KOfam profile for M00531
162	WATER_MAG_00001	M00616	Sulfate-sulfur assimilation	Signature modules	Module set	Metabolic capacity	(K02048,K23163)+K02046+K02047+K02045 M00176	0.416666667	FALSE	K00958,K00392,K00390	401,444,439,618,804	No KOfam profile for M00176
0	WATER_MAG_00002	M00001	Glycolysis (Embden-Meyerhof pathway), glucose => pyruvate	Pathway modules	Carbohydrate metabolism	Central carbohydrate metabolism	(K00844,K12407,K00845,K00886,K08074,K00918) (K01810,K06859,K13810,K15916) (K00850,K16370,K21071,K00918) (K01623,K01624,K11645,K16305,K16306) K01803 ((K00134,K00150) K00927,K11389) (K01834,K15633,K15634,K15635) K01689 (K00873,K12406)	0.6	FALSE	K01689,K15633,K01624,K00134,K00873,K00927	405,834,979,862,922,000,000,000,000,000,000	None
1	WATER_MAG_00002	M00002	Glycolysis, core module involving three-carbon compounds	Pathway modules	Carbohydrate metabolism	Central carbohydrate metabolism	K01803 ((K00134,K00150) K00927,K11389) (K01834,K15633,K15634,K15635) K01689 (K00873,K12406)	0.833333333	TRUE	K01689,K15633,K00134,K00873,K00927	4,058,349,798,104,920,000,000,000,000	None
2	WATER_MAG_00002	M00003	Gluconeogenesis, oxaloacetate => fructose-6P	Pathway modules	Carbohydrate metabolism	Central carbohydrate metabolism	(K01596,K01610) K01689 (K01834,K15633,K15634,K15635) K00927 (K00134,K00150) K01803 ((K01623,K01624,K11645) (K03841,K02446,K11532,K01086,K04041),K01622)	0.75	TRUE	K01610,K01689,K15633,K01624,K00134,K00927	55,762,609,914,058,300,000,000,000,000,000,000,000	None
3	WATER_MAG_00002	M00307	Pyruvate oxidation, pyruvate => acetyl-CoA	Pathway modules	Carbohydrate metabolism	Central carbohydrate metabolism	((K00163,K00161+K00162)+K00627+K00382-K13997),K00169+K00170+K00171+(K00172,K00189),K03737	1	TRUE	K00169,K00171,K00170,K00172	23,156,231,572,315,500,000	None
4	WATER_MAG_00002	M00009	Citrate cycle (TCA cycle, Krebs cycle)	Pathway modules	Carbohydrate metabolism	Central carbohydrate metabolism	(K01647,K05942) (K01681,K01682) (K00031,K00030) (K00164+K00658+K00382,K00174+K00175-K00177-K00176) (K01902+K01903,K01899+K01900,K18118) (K00234+K00235+K00236+K00237,K00239+K00240+K00241-(K00242,K18859,K18860),K00244+K00245+K00246-K00247) (K01676,K01679,K01677+K01678) (K00026,K00025,K00024,K00116)	0.875	TRUE	K01676,K01647,K00240,K00245,K00244,K00246,K00024,K00174,K00175,K01682,K00116,K00177,K00031	51,601,622,402,734,700,000,000,000,000,000,000,000,000,000,000,000,000,000,000,000	None
5	WATER_MAG_00002	M00010	Citrate cycle, first carbon oxidation, oxaloacetate => 2-oxoglutarate	Pathway modules	Carbohydrate metabolism	Central carbohydrate metabolism	(K01647,K05942) (K01681,K01682) (K00031,K00030)	1	TRUE	K01647,K01682,K00031	62,240,755,632,629	None
6	WATER_MAG_00002	M00011	Citrate cycle, second carbon oxidation, 2-oxoglutarate => oxaloacetate	Pathway modules	Carbohydrate metabolism	Central carbohydrate metabolism	(K00164+K00658+K00382,K00174+K00175-K00177-K00176) (K01902+K01903,K01899+K01900,K18118) (K00234+K00235+K00236+K00237,K00239+K00240+K00241-(K00242,K18859,K18860),K00244+K00245+K00246-K00247) (K01676,K01679,K01677+K01678) (K00026,K00025,K00024,K00116)	0.8	TRUE	K01676,K00240,K00245,K00244,K00246,K00024,K00174,K00175,K00116,K00177	516,012,734,739,972,000,000,000,000,000,000,000,000,000,000,000	None
7	WATER_MAG_00002	M00004	Pentose phosphate pathway (Pentose phosphate cycle)	Pathway modules	Carbohydrate metabolism	Central carbohydrate metabolism	(K13937,((K00036,K19243) (K01057,K07404))) K00033 K01783 (K01807,K01808) K00615 K00616 (K01810,K06859,K13810,K15916)	0.285714286	FALSE	K01808,K00615	5,186,420,003	None
8	WATER_MAG_00002	M00007	Pentose phosphate pathway, non-oxidative phase, fructose 6P => ribose 5P	Pathway modules	Carbohydrate metabolism	Central carbohydrate metabolism	K00615 (K00616,K13810) K01783 (K01807,K01808)	0.5	FALSE	K01808,K00615	5,186,420,003	None
9	WATER_MAG_00002	M00005	PRPP biosynthesis, ribose 5P => PRPP	Pathway modules	Carbohydrate metabolism	Central carbohydrate metabolism	K00948	1	TRUE	K00948	1727	None
10	WATER_MAG_00002	M00308	Semi-phosphorylative Entner-Doudoroff pathway, gluconate => glycerate-3P	Pathway modules	Carbohydrate metabolism	Central carbohydrate metabolism	K05308 K00874 K01625 (K00134 K00927,K00131,K18978)	0.4	FALSE	K00134,K00927	1,049,210,491	None
11	WATER_MAG_00002	M00552	D-galactonate degradation, De Ley-Doudoroff pathway, D-galactonate => glycerate-3P	Pathway modules	Carbohydrate metabolism	Other carbohydrate metabolism	K01684 K00883 K01631 K00134 K00927	0.4	FALSE	K00134,K00927	1,049,210,491	None
12	WATER_MAG_00002	M00892	UDP-N-acetyl-D-glucosamine biosynthesis, eukaryotes, glucose => UDP-GlcNAc	Pathway modules	Carbohydrate metabolism	Other carbohydrate metabolism	(K00844,K12407,K00845) K01810 K00820 K00621 K01836 K00972	0.166666667	FALSE	K00820	30139	None
13	WATER_MAG_00002	M00909	UDP-N-acetyl-D-glucosamine biosynthesis, prokaryotes, glucose => UDP-GlcNAc	Pathway modules	Carbohydrate metabolism	Other carbohydrate metabolism	K00845 (K01810,K13810,K15916) K00820 K03431 K04042	0.6	FALSE	K04042,K00820,K03431	309,573,013,912,894	None
14	WATER_MAG_00002	M00012	Glyoxylate cycle	Pathway modules	Carbohydrate metabolism	Other carbohydrate metabolism	K01647 (K01681,K01682) K01637 (K01638,K19282) (K00026,K00025,K00024)	0.6	FALSE	K01647,K00024,K01682	6,224,028,547,556	None
15	WATER_MAG_00002	M00373	Ethylmalonyl pathway	Pathway modules	Carbohydrate metabolism	Other carbohydrate metabolism	K00626 K00023 K17865 K14446 K14447 K14448 K14449 K08691 K14451 K01965+K01966 K05606 K01847	0.083333333	FALSE	K14449	51599	None
16	WATER_MAG_00002	M00740	Methylaspartate cycle	Pathway modules	Carbohydrate metabolism	Other carbohydrate metabolism	K01647 K01681 K00031 K00261 K19268+K01846 K04835 K19280 K14449 K19281 K19282 K00024	0.454545455	FALSE	K01647,K14449,K19268,K00024,K01846,K00031	62,240,515,996,172,800,000,000,000,000	None
17	WATER_MAG_00002	M00532	Photorespiration	Pathway modules	Carbohydrate metabolism	Other carbohydrate metabolism	(K01601-K01602) K19269 K11517 K03781 K14272 K00600 K00830 (K15893,K15919) K15918 K00281+K00605+K00382+K02437	0.1	FALSE	K00600	6,108,023,438	None
18	WATER_MAG_00002	M00131	Inositol phosphate metabolism, Ins(1,3,4,5)P4 => Ins(1,3,4)P3 => myo-inositol	Pathway modules	Carbohydrate metabolism	Other carbohydrate metabolism	K01106 K01107 K01109 K01092	0.25	FALSE	K01092	54879	None
19	WATER_MAG_00002	M00165	Reductive pentose phosphate cycle (Calvin cycle)	Pathway modules	Energy metabolism	Carbon fixation	K00855 (K01601-K01602) K00927 (K05298,K00150,K00134) (K01623,K01624) (K03841,K02446,K11532,K01086) K00615 (K01623,K01624) (K01100,K11532,K01086) K00615 (K01807,K01808)	0.636363636	FALSE	K01808,K01624,K00134,K00615,K00927	5,186,462,922,104,920,000,000,000	No KOfam profile for M00165
20	WATER_MAG_00002	M00166	Reductive pentose phosphate cycle, ribulose-5P => glyceraldehyde-3P	Pathway modules	Energy metabolism	Carbon fixation	K00855 (K01601-K01602) K00927 (K05298,K00150,K00134)	0.5	FALSE	K00134,K00927	1,049,210,491	None
21	WATER_MAG_00002	M00167	Reductive pentose phosphate cycle, glyceraldehyde-3P => ribulose-5P	Pathway modules	Energy metabolism	Carbon fixation	(K01623,K01624) (K03841,K02446,K11532,K01086) K00615 (K01623,K01624) (K01100,K11532,K01086) K00615 (K01807,K01808)	0.714285714	FALSE	K01808,K01624,K00615	518,646,292,220,003	None
22	WATER_MAG_00002	M00168	CAM (Crassulacean acid metabolism), dark	Pathway modules	Energy metabolism	Carbon fixation	K01595 (K00025,K00026,K00024)	0.5	FALSE	K00024	2854	None
23	WATER_MAG_00002	M00170	C4-dicarboxylic acid cycle, phosphoenolpyruvate carboxykinase type	Pathway modules	Energy metabolism	Carbon fixation	K01595 K14454 K14455 K01610	0.25	FALSE	K01610	5,576,260,991	None
24	WATER_MAG_00002	M00173	Reductive citrate cycle (Arnon-Buchanan cycle)	Pathway modules	Energy metabolism	Carbon fixation	(K00169+K00170+K00171+K00172,K03737) ((K01007,K01006) K01595,K01959+K01960,K01958) K00024 (K01676,K01679,K01677+K01678) (K00239+K00240-K00241-K00242,K00244+K00245-K00246-K00247,K18556+K18557+K18558+K18559+K18560) (K01902+K01903) (K00174+K00175-K00177-K00176) K00031 (K01681,K01682) (K15230+K15231,K15232+K15233 K15234)	0.727272727	FALSE	K01676,K00240,K01007,K00245,K00244,K00246,K00169,K00024,K00174,K00175,K00171,K00170,K00172,K01682,K00177,K00031	5,160,127,347,399,770,000,000,000,000,000,000,000,000,000,000,000,000,000,000,000,000,000,000,000,000	No KOfam profile for M00173
25	WATER_MAG_00002	M00376	3-Hydroxypropionate bi-cycle	Pathway modules	Energy metabolism	Carbon fixation	(K02160+K01961+K01962+K01963) K14468 K14469 K15052 K05606 (K01847,K01848+K01849) (K14471+K14472) (K00239+K00240+K00241) K01679 K08691 K14449 K14470 K09709	0.179487179	FALSE	K14449,K01962,K00240,K02160,K01961,K01963	5,159,948,407,273,470,000,000,000,000,000,000	No KOfam profile for M00376
26	WATER_MAG_00002	M00374	Dicarboxylate-hydroxybutyrate cycle	Pathway modules	Energy metabolism	Carbon fixation	(K00169+K00170+K00171+K00172) K01007 K01595 K00024 (K01677+K01678) (K00239+K00240-K00241-K18860) (K01902+K01903) (K15038,K15017) K14465 (K14467,K18861) K14534 K15016 K00626	0.269230769	FALSE	K00240,K01007,K00169,K00024,K00171,K00170,K00172	2,734,739,977,990,230,000,000,000,000,000,000,000	None
27	WATER_MAG_00002	M00377	Reductive acetyl-CoA pathway (Wood-Ljungdahl pathway)	Pathway modules	Energy metabolism	Carbon fixation	K00198 K05299-K15022 K01938 K01491 K00297 K15023 K14138+K00197+K00194	0.142857143	FALSE	K01491	51866	No KOfam profile for M00377
28	WATER_MAG_00002	M00579	Phosphate acetyltransferase-acetate kinase pathway, acetyl-CoA => acetate	Pathway modules	Energy metabolism	Carbon fixation	(K00625,K13788,K15024) K00925	0.5	FALSE	K00925	21307	No KOfam profile for M00579
29	WATER_MAG_00002	M00620	Incomplete reductive citrate cycle, acetyl-CoA => oxoglutarate	Pathway modules	Energy metabolism	Carbon fixation	(K00169+K00170+K00171+K00172) (K01959+K01960) K00024 (K01677+K01678) (K18209+K18210) (K01902+K01903) (K00174+K00175+K00176+K00177)	0.392857143	FALSE	K00169,K00024,K00174,K00175,K00171,K00170,K00172,K00177	231,562,854,201,202,000,000,000,000,000,000,000,000	None
30	WATER_MAG_00002	M00357	Methanogenesis, acetate => methane	Pathway modules	Energy metabolism	Methane metabolism	((K00925 K00625),K01895) (K00193+K00197+K00194) (K00577+K00578+K00579+K00580+K00581-K00582-K00583+K00584) (K00399+K00401+K00402) (K22480+K22481+K22482,K03388+K03389+K03390,K08264+K08265,K03388+K03389+K03390+K14127+(K14126+K14128,K22516+K00125))	0.166666667	FALSE	K00925	21307	None
31	WATER_MAG_00002	M00346	Formaldehyde assimilation, serine pathway	Pathway modules	Energy metabolism	Methane metabolism	K00600 K00830 K00018 K11529 K01689 K01595 K00024 K08692+K14067 K08691	0.444444444	FALSE	K00018,K01689,K00600,K00024	386,234,058,361,080,000,000,000,000	None
32	WATER_MAG_00002	M00345	Formaldehyde assimilation, ribulose monophosphate pathway	Pathway modules	Energy metabolism	Methane metabolism	(((K08093,K13812) K08094),K13831) (K00850,K16370) K01624	0.333333333	FALSE	K01624	62922	None
33	WATER_MAG_00002	M00344	Formaldehyde assimilation, xylulose monophosphate pathway	Pathway modules	Energy metabolism	Methane metabolism	K17100 K00863 K01624 K03841	0.25	FALSE	K01624	62922	None
34	WATER_MAG_00002	M00530	Dissimilatory nitrate reduction, nitrate => ammonia	Pathway modules	Energy metabolism	Nitrogen metabolism	(K00370+K00371+K00374,K02567+K02568) (K00362+K00363,K03385+K15876)	0.5	FALSE	K00362,K02567	4,866,430,540	None
35	WATER_MAG_00002	M00529	Denitrification, nitrate => nitrogen	Pathway modules	Energy metabolism	Nitrogen metabolism	(K00370+K00371+K00374,K02567+K02568) (K00368,K15864) (K04561+K02305) K00376	0.125	FALSE	K02567	30540	None
36	WATER_MAG_00002	M00176	Assimilatory sulfate reduction, sulfate => H2S	Pathway modules	Energy metabolism	Sulfur metabolism	(K13811,K00958+K00860,K00955+K00957,K00956+K00957+K00860) K00390 (K00380+K00381,K00392)	0.555555556	FALSE	K00390,K00956,K00957	206,920,712,070	No KOfam profile for M00176
37	WATER_MAG_00002	M00595	Thiosulfate oxidation by SOX complex, thiosulfate => sulfate	Pathway modules	Energy metabolism	Sulfur metabolism	K17222+K17223+K17224-K17225-K22622+K17226+K17227	1	TRUE	K22622,K17225,K17224,K17226,K17227,K17223,K17222	7,281,728,028,689,240,000,000,000,000,000,000,000,000,000	None
38	WATER_MAG_00002	M00144	NADH:quinone oxidoreductase, prokaryotes	Pathway modules	Energy metabolism	ATP synthesis	K00330+(K00331+K00332+K00333,K00331+K13378,K13380)+K00334+K00335+K00336+K00337+K00338+K00339+K00340+(K00341+K00342)+K00343	0.846153846	TRUE	K00341,K00337,K00331,K00330,K00333,K00340,K00343,K00342,K00338,K13378,K00339,K00334	398,233,336,433,358,000,000,000,000,000,000,000,000,000,000,000,000,000,000,000,000,000,000,000,000,000,000,000,000,000,000	None
39	WATER_MAG_00002	M00149	Succinate dehydrogenase, prokaryotes	Pathway modules	Energy metabolism	ATP synthesis	K00241+(K00242,K18859,K18860)+K00239+K00240	0.25	FALSE	K00240	273,473,997	None
40	WATER_MAG_00002	M00150	Fumarate reductase, prokaryotes	Pathway modules	Energy metabolism	ATP synthesis	K00244+K00245+K00246+K00247	0.75	TRUE	K00245,K00244,K00246	273,472,734,627,345	None
41	WATER_MAG_00002	M00151	Cytochrome bc1 complex respiratory unit	Pathway modules	Energy metabolism	ATP synthesis	((K00412+K00413,K00410)+K00411),K03886+K03887+K03888,K03890+K03891+K03889	1	TRUE	K00413,K00412,K00411	404,134,041,440,415	None
42	WATER_MAG_00002	M00152	Cytochrome bc1 complex	Pathway modules	Energy metabolism	ATP synthesis	K00411+K00412+K00413+K00414+K00415+K00416+K00417+K00418+K00419+K00420	0.3	FALSE	K00413,K00412,K00411	404,134,041,440,415	None
43	WATER_MAG_00002	M00156	Cytochrome c oxidase, cbb3-type	Pathway modules	Energy metabolism	ATP synthesis	((K00404+K00405,K15862)+K00407+K00406)	1	TRUE	K00407,K00406,K00404,K00405	49,831,498,324,982,900,000	None
44	WATER_MAG_00002	M00157	F-type ATPase, prokaryotes and chloroplasts	Pathway modules	Energy metabolism	ATP synthesis	K02111+K02112+K02113+K02114+K02115+K02108+K02109+K02110	0.875	TRUE	K02109,K02111,K02112,K02113,K02114,K02115,K02108	4,597,945,978,459,760,000,000,000,000,000,000,000,000	None
45	WATER_MAG_00002	M00082	Fatty acid biosynthesis, initiation	Pathway modules	Lipid metabolism	Fatty acid metabolism	(K11262,(K02160+K01961,K11263)+(K01962+K01963,K18472)) (K00665,K00667+K00668,K11533,(K00645 (K00648,K18473)))	1	TRUE	K01962,K00648,K00645,K02160,K01961,K01963	48,407,595,838,400,100,000,000,000,000	None
46	WATER_MAG_00002	M00083	Fatty acid biosynthesis, elongation	Pathway modules	Lipid metabolism	Fatty acid metabolism	K00665,(K00667 K00668),K11533,((K00647,K09458) K00059 (K02372,K01716,K16363) (K00208,K02371,K10780,K00209))	1	TRUE	K09458,K00059,K02372,K00208	4,840,662,985,165,230,000	None
47	WATER_MAG_00002	M00873	Fatty acid biosynthesis in mitochondria, animals	Pathway modules	Lipid metabolism	Fatty acid metabolism	K18660 K03955+K00645 K09458 K11539+K13370 K22540 K07512	0.25	FALSE	K09458,K00645	484,068,400	None
48	WATER_MAG_00002	M00874	Fatty acid biosynthesis in mitochondria, fungi	Pathway modules	Lipid metabolism	Fatty acid metabolism	K11262 K03955+K00645 K09458 K00059 K22541 K07512	0.416666667	FALSE	K09458,K00059,K00645	48,406,629,858,400	None
49	WATER_MAG_00002	M00086	beta-Oxidation, acyl-CoA synthesis	Pathway modules	Lipid metabolism	Fatty acid metabolism	K01897,K15013	1	TRUE	K01897	30888	None
50	WATER_MAG_00002	M00089	Triacylglycerol biosynthesis	Pathway modules	Lipid metabolism	Lipid metabolism	(K00629,K13506,K13507,K00630,K13508) (K00655,K13509,K13523,K19007,K13513,K13517,K13519,K14674,K22831) (K01080,K15728,K18693) (K11155,K11160,K14456,K22848,K22849)	0.25	FALSE	K00655	10498	None
51	WATER_MAG_00002	M00093	Phosphatidylethanolamine (PE) biosynthesis, PA => PS => PE	Pathway modules	Lipid metabolism	Lipid metabolism	K00981 (K00998,K17103) K01613	1	TRUE	K17103,K01613,K00981	59,566,506,424,008	None
52	WATER_MAG_00002	M00048	Inosine monophosphate biosynthesis, PRPP + glutamine => IMP	Pathway modules	Nucleotide metabolism	Purine metabolism	K00764 (K01945,K11787,K11788,K13713) (K00601,K11175,K08289,K11787,K01492) (K01952,(K23269+K23264+K23265),(K23270+K23265)) (K01933,K11787,K11788 (K01587,K11808,K01589 K01588)) (K01923,K01587,K13713) K01756 (K00602,(K01492,K06863 K11176))	0.958333333	TRUE	K01588,K01589,K23264,K01945,K11175,K01923,K01933,K00764,K00602,K08289,K01756,K23269	5,446,054,459,405,220,000,000,000,000,000,000,000,000,000,000,000,000,000,000,000,000,000,000	None
53	WATER_MAG_00002	M00049	Adenine ribonucleotide biosynthesis, IMP => ADP,ATP	Pathway modules	Nucleotide metabolism	Purine metabolism	K01939 K01756 (K00939,K18532,K18533,K00944) (K00940,K00873,K12406)	1	TRUE	K00939,K00940,K00873,K01939,K01756	63,740,595,872,636,800,000,000,000,000,000,000	None
54	WATER_MAG_00002	M00050	Guanine ribonucleotide biosynthesis IMP => GDP,GTP	Pathway modules	Nucleotide metabolism	Purine metabolism	K00088 K01951 K00942 (K00940,K18533,K00873,K12406)	0.75	TRUE	K00940,K00088,K00873,K01951	59,587,410,332,636,800,000	None
55	WATER_MAG_00002	M00051	Uridine monophosphate biosynthesis, glutamine (+ PRPP) => UMP	Pathway modules	Nucleotide metabolism	Pyrimidine metabolism	(K11540,(K11541 K01465),((K01954,K01955+K01956) (K00609+K00610,K00608) K01465)) (K00226,K00254,K17828) (K13421,K00762 K01591)	0.916666667	TRUE	K00254,K00609,K01956,K00762,K01591,K01465,K01955	43,655,594,921,658,400,000,000,000,000,000,000	None
56	WATER_MAG_00002	M00052	Pyrimidine ribonucleotide biosynthesis, UMP => UDP/UTP,CDP/CTP	Pathway modules	Nucleotide metabolism	Pyrimidine metabolism	(K13800,K13809,K09903) (K00940,K18533) K01937	1	TRUE	K00940,K01937,K09903	59,587,572,730,733	None
57	WATER_MAG_00002	M00053	Pyrimidine deoxyribonuleotide biosynthesis, CDP/CTP => dCDP/dCTP,dTDP/dTTP	Pathway modules	Nucleotide metabolism	Pyrimidine metabolism	(K00524,K00525+K00526,K10807+K10808) (K00940,K18533) (K00527,K21636) K01494 K01520 (K00560,K13998) K00943 K00940	0.625	FALSE	K00525,K00940,K00560,K00943,K00526	616,284,105,759,587,000,000,000,000,000,000,000,000	None
58	WATER_MAG_00002	M00020	Serine biosynthesis, glycerate-3P => serine	Pathway modules	Amino acid metabolism	Serine and threonine metabolism	K00058 K00831 (K01079,K02203,K22305)	0.666666667	FALSE	K00058,K01079	5,188,924,163	None
59	WATER_MAG_00002	M00018	Threonine biosynthesis, aspartate => homoserine => threonine	Pathway modules	Amino acid metabolism	Serine and threonine metabolism	(K00928,K12524,K12525,K12526) K00133 (K00003,K12524,K12525) (K00872,K02204,K02203) K01733	1	TRUE	K00928,K00003,K01733,K00872,K00133	576,133,410,859,500,000,000,000,000,000	None
60	WATER_MAG_00002	M00033	Ectoine biosynthesis, aspartate => ectoine	Pathway modules	Amino acid metabolism	Serine and threonine metabolism	K00928 K00133 K00836 K06718 K06720	0.4	FALSE	K00928,K00133	5,761,312,565	None
61	WATER_MAG_00002	M00021	Cysteine biosynthesis, serine => cysteine	Pathway modules	Amino acid metabolism	Cysteine and methionine metabolism	(K00640,K23304) (K01738,K13034,K17069)	0.5	FALSE	K00640	28454	None
62	WATER_MAG_00002	M00609	Cysteine biosynthesis, methionine => cysteine	Pathway modules	Amino acid metabolism	Cysteine and methionine metabolism	K00789 K17462 K01243 K07173 K17216 K17217	0.5	FALSE	K07173,K01243,K00789	23,152,839,930,138	None
63	WATER_MAG_00002	M00017	Methionine biosynthesis, apartate => homoserine => methionine	Pathway modules	Amino acid metabolism	Cysteine and methionine metabolism	(K00928,K12524,K12525) K00133 (K00003,K12524,K12525) (K00651,K00641) K01739 (K01760,K14155) (K00548,K24042,K00549)	0.571428571	FALSE	K00928,K00003,K00133,K00548	57,613,341,081,256,500,000	None
64	WATER_MAG_00002	M00034	Methionine salvage pathway	Pathway modules	Amino acid metabolism	Cysteine and methionine metabolism	K00789 K01611 K00797 ((K01243,K01244) K00899,K00772) K08963 (K16054,K08964 (K09880,K08965 K08966)) K08967 (K00815,K08969,K23977,K00832,K00838)	0.222222222	FALSE	K01243,K00789	839,930,138	None
65	WATER_MAG_00002	M00035	Methionine degradation	Pathway modules	Amino acid metabolism	Cysteine and methionine metabolism	K00789 (K00558,K17398,K17399) K01251 (K01697,K10150)	0.25	FALSE	K00789	30138	None
66	WATER_MAG_00002	M00368	Ethylene biosynthesis, methionine => ethylene	Pathway modules	Amino acid metabolism	Cysteine and methionine metabolism	K00789 (K01762,K20772) K05933	0.333333333	FALSE	K00789	30138	None
67	WATER_MAG_00002	M00019	Valine/isoleucine biosynthesis, pyruvate => valine / 2-oxobutanoate => isoleucine	Pathway modules	Amino acid metabolism	Branched-chain amino acid metabolism	K01652+(K01653,K11258) K00053 K01687 K00826	1	TRUE	K00053,K01652,K01653,K00826,K01687	5,243,459,568,495,500,000,000,000,000,000,000	None
68	WATER_MAG_00002	M00535	Isoleucine biosynthesis, pyruvate => 2-oxobutanoate	Pathway modules	Amino acid metabolism	Branched-chain amino acid metabolism	K09011 K01703+K01704 K00052	0.666666667	FALSE	K00052,K01704,K01703	151,811,518,022,245	None
69	WATER_MAG_00002	M00570	Isoleucine biosynthesis, threonine => 2-oxobutanoate => isoleucine	Pathway modules	Amino acid metabolism	Branched-chain amino acid metabolism	(K17989,K01754) K01652+(K01653,K11258) K00053 K01687 K00826	1	TRUE	K00053,K01652,K01653,K01754,K00826,K01687	524,345,956,849,550,000,000,000,000,000,000,000,000	None
70	WATER_MAG_00002	M00432	Leucine biosynthesis, 2-oxoisovalerate => 2-oxoisocaproate	Pathway modules	Amino acid metabolism	Branched-chain amino acid metabolism	K01649 (K01702,K01703+K01704) K00052	0.666666667	FALSE	K00052,K01704,K01703	151,811,518,022,245	None
71	WATER_MAG_00002	M00036	Leucine degradation, leucine => acetoacetate + acetyl-CoA	Pathway modules	Amino acid metabolism	Branched-chain amino acid metabolism	K00826 ((K00166+K00167,K11381)+K09699+K00382) (K00253,K00249) (K01968+K01969) (K05607,K13766) K01640	0.166666667	FALSE	K00826	9309	None
72	WATER_MAG_00002	M00016	Lysine biosynthesis, succinyl-DAP pathway, aspartate => lysine	Pathway modules	Amino acid metabolism	Lysine metabolism	(K00928,K12524,K12525,K12526) K00133 K01714 K00215 K00674 (K00821,K14267) K01439 K01778 (K01586,K12526)	0.888888889	TRUE	K00928,K01439,K00215,K00674,K00133,K01714,K01586,K01778	57,613,436,025,903,000,000,000,000,000,000,000,000	None
73	WATER_MAG_00002	M00525	Lysine biosynthesis, acetyl-DAP pathway, aspartate => lysine	Pathway modules	Amino acid metabolism	Lysine metabolism	K00928 K00133 K01714 K00215 K05822 K00841 K05823 K01778 K01586	0.666666667	FALSE	K00928,K00215,K00133,K01714,K01586,K01778	5,761,359,030,125,650,000,000,000,000	None
74	WATER_MAG_00002	M00526	Lysine biosynthesis, DAP dehydrogenase pathway, aspartate => lysine	Pathway modules	Amino acid metabolism	Lysine metabolism	(K00928,K12524,K12525,K12526) K00133 K01714 K00215 K03340 (K01586,K12526)	0.833333333	TRUE	K00928,K00215,K00133,K01714,K01586	576,135,903,012,565,000,000,000	None
75	WATER_MAG_00002	M00527	Lysine biosynthesis, DAP aminotransferase pathway, aspartate => lysine	Pathway modules	Amino acid metabolism	Lysine metabolism	(K00928,K12524,K12525,K12526) K00133 K01714 K00215 K10206 K01778 (K01586,K12526)	0.857142857	TRUE	K00928,K00215,K00133,K01714,K01586,K01778	5,761,359,030,125,650,000,000,000,000	None
76	WATER_MAG_00002	M00030	Lysine biosynthesis, AAA pathway, 2-oxoglutarate => 2-aminoadipate => lysine	Pathway modules	Amino acid metabolism	Lysine metabolism	K01655 K17450 K01705 K05824 K00838 K00143 (K00293,K24034) K00290	0.125	FALSE	K00290	53175	None
77	WATER_MAG_00002	M00028	Ornithine biosynthesis, glutamate => ornithine	Pathway modules	Amino acid metabolism	Arginine and proline metabolism	(K00618,K00619,K14681,K14682,K00620,K22477,K22478) ((K00930,K22478) K00145,K12659) (K00818,K00821) (K01438,K14677,K00620)	0.8	TRUE	K00145,K00620,K00930,K00619	23,864,121,482,806,200,000	None
78	WATER_MAG_00002	M00844	Arginine biosynthesis, ornithine => arginine	Pathway modules	Amino acid metabolism	Arginine and proline metabolism	K00611 K01940 (K01755,K14681)	1	TRUE	K00611,K01755,K01940	4,111,733,618,680	None
79	WATER_MAG_00002	M00845	Arginine biosynthesis, glutamate => acetylcitrulline => arginine	Pathway modules	Amino acid metabolism	Arginine and proline metabolism	K22478 K00145 K00821 K09065 K01438 K01940 K01755	0.428571429	FALSE	K01755,K01940,K00145	3,361,868,023,864	None
80	WATER_MAG_00002	M00029	Urea cycle	Pathway modules	Amino acid metabolism	Arginine and proline metabolism	K01948 K00611 K01940 (K01755,K14681) K01476	0.6	FALSE	K00611,K01755,K01940	4,111,733,618,680	None
81	WATER_MAG_00002	M00015	Proline biosynthesis, glutamate => proline	Pathway modules	Amino acid metabolism	Arginine and proline metabolism	((K00931 K00147),K12657) K00286	1	TRUE	K00147,K00931,K00286	491,793,481,419,054	None
82	WATER_MAG_00002	M00133	Polyamine biosynthesis, arginine => agmatine => putrescine => spermidine	Pathway modules	Amino acid metabolism	Polyamine biosynthesis	(K01583,K01584,K01585,K02626) K01480 K01611 K00797	0.25	FALSE	K01480	50828	None
83	WATER_MAG_00002	M00026	Histidine biosynthesis, PRPP => histidine	Pathway modules	Amino acid metabolism	Histidine metabolism	(K00765-K02502) (K01523 K01496,K11755,K14152) (K01814,K24017) (K02501+K02500,K01663) ((K01693 K00817 (K04486,K05602,K18649)),(K01089 K00817)) (K00013,K14152)	0.875	TRUE	K04486,K00765,K00013,K01814,K02500,K01496,K11755,K00817,K02501	539,845,395,945,693,000,000,000,000,000,000,000,000	None
84	WATER_MAG_00002	M00022	Shikimate pathway, phosphoenolpyruvate + erythrose-4P => chorismate	Pathway modules	Amino acid metabolism	Aromatic amino acid metabolism	(K01626,K03856,K13853) (((K01735,K13829) ((K03785,K03786) K00014,K13832)),K13830) ((K00891,K13829) (K00800,K24018),K13830) K01736	0.857142857	TRUE	K00014,K01735,K01626,K00800,K01736,K03786	532,765,124,542,216,000,000,000,000,000	None
85	WATER_MAG_00002	M00023	Tryptophan biosynthesis, chorismate => tryptophan	Pathway modules	Amino acid metabolism	Aromatic amino acid metabolism	(((K01657+K01658,K13503,K13501,K01656) K00766),K13497) (((K01817,K24017) (K01656,K01609)),K13498,K13501) (K01695+(K01696,K06001),K01694)	0.7	FALSE	K01658,K00766,K01695,K01696,K01609	4,332,056,568,635,310,000,000,000	None
86	WATER_MAG_00002	M00024	Phenylalanine biosynthesis, chorismate => phenylpyruvate => phenylalanine	Pathway modules	Amino acid metabolism	Aromatic amino acid metabolism	((K01850,K04092,K14187,K04093,K04516,K06208,K06209) (K01713,K04518,K05359),K14170) (K00832,K00838)	0.5	FALSE	K04518,K14170	5056	None
87	WATER_MAG_00002	M00025	Tyrosine biosynthesis, chorismate => HPP => tyrosine	Pathway modules	Amino acid metabolism	Aromatic amino acid metabolism	(((K01850,K04092,K14170,K04093,K04516,K06208,K06209) (K04517,K00211)),K14187) (K00832,K00838)	0.333333333	FALSE	K14170	5056	None
88	WATER_MAG_00002	M00040	Tyrosine biosynthesis, chorismate => arogenate => tyrosine	Pathway modules	Amino acid metabolism	Aromatic amino acid metabolism	(K01850,K04092,K14170) (K00832,K15849) (K00220,K24018,K15227)	0.333333333	FALSE	K14170	5056	None
89	WATER_MAG_00002	M00060	KDO2-lipid A biosynthesis, Raetz pathway, LpxL-LpxM type	Pathway modules	Glycan metabolism	Lipopolysaccharide metabolism	K00677 K02535 K02536 (K03269,K09949) K00748 K00912 K02527 K02517 K02560	0.666666667	FALSE	K02535,K02536,K00912,K02527,K00748,K00677	643,644,955,150,369,000,000,000,000,000	None
90	WATER_MAG_00002	M00866	KDO2-lipid A biosynthesis, Raetz pathway, non-LpxL-LpxM type	Pathway modules	Glycan metabolism	Lipopolysaccharide metabolism	K00677 (K02535,K16363) K02536 (K03269,K09949) K00748 K00912 K02527 K02517 K09778	0.777777778	TRUE	K02535,K02536,K00912,K09778,K02527,K00748,K00677	64,364,495,515,036,900,000,000,000,000,000,000	None
91	WATER_MAG_00002	M00063	CMP-KDO biosynthesis	Pathway modules	Glycan metabolism	Lipopolysaccharide metabolism	K06041 K01627 K03270 K00979	1	TRUE	K03270,K06041,K00979,K01627	36,080,618,086,135,000,000	None
92	WATER_MAG_00002	M00127	Thiamine biosynthesis, prokaryotes, AIR (+ DXP/tyrosine) => TMP/TPP	Pathway modules	Metabolism of cofactors and vitamins	Cofactor and vitamin metabolism	K03148+K03154 K03151 K03150 K03149 K03147 ((K00941 K00788),K14153,K21219) K00946	0.428571429	FALSE	K03149,K03151,K03147	3,711,551,134,931,310,000	None
93	WATER_MAG_00002	M00895	Thiamine biosynthesis, prokaryotes, AIR (+ DXP/glycine) => TMP/TPP	Pathway modules	Metabolism of cofactors and vitamins	Cofactor and vitamin metabolism	K03148+K03154 K03151 K03153 K03149 K10810 K03147 K00941 K00788 K00946	0.333333333	FALSE	K03149,K03151,K03147	3,711,551,134,931,310,000	None
94	WATER_MAG_00002	M00896	Thiamine biosynthesis, archaea, AIR (+ NAD+) => TMP/TPP	Pathway modules	Metabolism of cofactors and vitamins	Cofactor and vitamin metabolism	K22699 K03147 (K00941 (K00788,K21220),K21219) K00946	0.25	FALSE	K03147	931,311,623	None
95	WATER_MAG_00002	M00897	Thiamine biosynthesis, plants, AIR (+ NAD+) => TMP/thiamine/TPP	Pathway modules	Metabolism of cofactors and vitamins	Cofactor and vitamin metabolism	K03146 K03147 K14153 K22911 K00949	0.2	FALSE	K03147	931,311,623	None
96	WATER_MAG_00002	M00125	Riboflavin biosynthesis, plants and bacteria, GTP => riboflavin/FMN/FAD	Pathway modules	Metabolism of cofactors and vitamins	Cofactor and vitamin metabolism	(K01497,K14652) (K01498 K00082,K11752) (K22912,K20860,K20861,K20862,K21063,K21064) (K02858,K14652) K00794 K00793 (K20884 K22949,K11753)	0.571428571	FALSE	K00793,K01497,K11753,K00794	5,720,337,053,408,780,000,000,000	None
97	WATER_MAG_00002	M00911	Riboflavin biosynthesis, fungi, GTP => riboflavin/FMN/FAD	Pathway modules	Metabolism of cofactors and vitamins	Cofactor and vitamin metabolism	K01497 K14654 K14655 -- K02858 K00794 K00793 K00861 K00953	0.333333333	FALSE	K00793,K01497,K00794	57,203,370,532,645,400,000	'--' steps are assumed incomplete
98	WATER_MAG_00002	M00115	NAD biosynthesis, aspartate => quinolinate => NAD	Pathway modules	Metabolism of cofactors and vitamins	Cofactor and vitamin metabolism	(K00278,K06989) K03517 K00767 (K00969,K06210) (K01916,K01950)	0.8	TRUE	K00278,K03517,K00969,K00767	151,692,241,010,493,000	None
99	WATER_MAG_00002	M00912	NAD biosynthesis, tryptophan => quinolinate => NAD	Pathway modules	Metabolism of cofactors and vitamins	Cofactor and vitamin metabolism	(K00453,K00463) (K01432,K14263,K07130) K00486 K01556 K00452 K00767 (K00969,K06210) (K01916,K01950)	0.25	FALSE	K00969,K00767	10,493,591	None
100	WATER_MAG_00002	M00119	Pantothenate biosynthesis, valine/L-aspartate => pantothenate	Pathway modules	Metabolism of cofactors and vitamins	Cofactor and vitamin metabolism	K00826 K00606 K00077 K01579 (K01918,K13799)	1	TRUE	K01918,K00606,K01579,K00077,K00826	592,376,353,247,781,000,000,000	None
101	WATER_MAG_00002	M00913	Pantothenate biosynthesis, 2-oxoisovalerate/spermine => pantothenate	Pathway modules	Metabolism of cofactors and vitamins	Cofactor and vitamin metabolism	K00606 K00077 K13367 K00128 K01918	0.6	FALSE	K01918,K00606,K00077	592,376,353,224,782	None
102	WATER_MAG_00002	M00120	Coenzyme A biosynthesis, pantothenate => CoA	Pathway modules	Metabolism of cofactors and vitamins	Cofactor and vitamin metabolism	(K00867,K03525,K01947,K09680) ((K01922,K21977) K01598,K13038) (K02318,(K00954,K02201) K00859)	1	TRUE	K03525,K00859,K13038,K00954	539,584,277,309,564,000	None
103	WATER_MAG_00002	M00914	Coenzyme A biosynthesis, archaea, 2-oxoisovalerate => 4-phosphopantoate => CoA	Pathway modules	Metabolism of cofactors and vitamins	Cofactor and vitamin metabolism	K00606 K00077 K06982 K09722 K13038 K02201 K09735	0.428571429	FALSE	K00606,K13038,K00077	635,323,095,624,782	None
104	WATER_MAG_00002	M00572	Pimeloyl-ACP biosynthesis, BioC-BioH pathway, malonyl-ACP => pimeloyl-ACP	Pathway modules	Metabolism of cofactors and vitamins	Cofactor and vitamin metabolism	K02169 (K00647,K09458) K00059 K02372 K00208 (K02170,K09789,K19560,K19561)	0.833333333	TRUE	K09458,K00059,K02372,K00208,K02169	484,066,298,516,523,000,000,000	None
105	WATER_MAG_00002	M00123	Biotin biosynthesis, pimeloyl-ACP/CoA => biotin	Pathway modules	Metabolism of cofactors and vitamins	Cofactor and vitamin metabolism	K00652 ((K00833,K19563) K01935,K19562) K01012	1	TRUE	K00833,K01012,K01935,K00652	51,921,526,316,731,200,000,000	None
106	WATER_MAG_00002	M00573	Biotin biosynthesis, BioI pathway, long-chain-acyl-ACP => pimeloyl-ACP => biotin	Pathway modules	Metabolism of cofactors and vitamins	Cofactor and vitamin metabolism	K16593 K00652 K19563 K01935 K01012	0.6	FALSE	K01012,K01935,K00652	526,316,731,218,846,000	None
107	WATER_MAG_00002	M00577	Biotin biosynthesis, BioW pathway, pimelate => pimeloyl-CoA => biotin	Pathway modules	Metabolism of cofactors and vitamins	Cofactor and vitamin metabolism	K01906 K00652 (K00833,K19563) K01935 K01012	0.8	TRUE	K00833,K01012,K01935,K00652	51,921,526,316,731,200,000,000	None
108	WATER_MAG_00002	M00126	Tetrahydrofolate biosynthesis, GTP => THF	Pathway modules	Metabolism of cofactors and vitamins	Cofactor and vitamin metabolism	(K01495,K09007,K22391) (K01077,K01113,(K08310,K19965)) ((K13939,(K13940,K01633 K00950) K00796),(K01633 K13941)) (K11754,K20457) (K00287,K13998)	0.428571429	FALSE	K00950,K01495,K00287,K22391	3,913,361,591,453,580,000,000,000	None
109	WATER_MAG_00002	M00840	Tetrahydrofolate biosynthesis, mediated by ribA and trpF, GTP => THF	Pathway modules	Metabolism of cofactors and vitamins	Cofactor and vitamin metabolism	K14652 K22100 -- K01633 K13941 K22099 K00287	0.142857143	FALSE	K00287	27064	'--' steps are assumed incomplete
110	WATER_MAG_00002	M00841	Tetrahydrofolate biosynthesis, mediated by PTPS, GTP => THF	Pathway modules	Metabolism of cofactors and vitamins	Cofactor and vitamin metabolism	K01495 K22101 K13941 K11754 K13998	0.2	FALSE	K01495	6,159,145,358	None
111	WATER_MAG_00002	M00842	Tetrahydrobiopterin biosynthesis, GTP => BH4	Pathway modules	Metabolism of cofactors and vitamins	Cofactor and vitamin metabolism	K01495 K01737 K00072	0.666666667	FALSE	K01737,K01495	62,983,615,914,535,800,000	None
112	WATER_MAG_00002	M00843	L-threo-Tetrahydrobiopterin biosynthesis, GTP => L-threo-BH4	Pathway modules	Metabolism of cofactors and vitamins	Cofactor and vitamin metabolism	K01495 K01737 K17745	0.666666667	FALSE	K01737,K01495	62,983,615,914,535,800,000	None
113	WATER_MAG_00002	M00880	Molybdenum cofactor biosynthesis, GTP => molybdenum cofactor	Pathway modules	Metabolism of cofactors and vitamins	Cofactor and vitamin metabolism	((K03639 K03637),K20967) (K03635,K21142) (((K03831,K03638) K03750),K15376)	0.8	TRUE	K03637,K03635,K03750,K03639	589,735,398,362,981,000,000,000	None
114	WATER_MAG_00002	M00140	C1-unit interconversion, prokaryotes	Pathway modules	Metabolism of cofactors and vitamins	Cofactor and vitamin metabolism	K00600 (K01491,(K00300 K01500)) K01938	0.666666667	FALSE	K01491,K00600	518,666,108,023,438	None
115	WATER_MAG_00002	M00141	C1-unit interconversion, eukaryotes	Pathway modules	Metabolism of cofactors and vitamins	Cofactor and vitamin metabolism	K00600 (K00288,(K13403 K13402))	0.5	FALSE	K00600	6,108,023,438	None
116	WATER_MAG_00002	M00846	Siroheme biosynthesis, glutamyl-tRNA => siroheme	Pathway modules	Metabolism of cofactors and vitamins	Cofactor and vitamin metabolism	K02492 K01845 K01698 K01749 (K01719,K13542,K13543) (K02302,(K00589,K02303,K02496,K13542,K13543)+K02304-K03794)	0.916666667	TRUE	K02492,K01698,K01719,K01749,K01845,K02304	60,102,456,964,111,600,000,000,000,000,000,000	None
117	WATER_MAG_00002	M00868	Heme biosynthesis, animals and fungi, glycine => heme	Pathway modules	Metabolism of cofactors and vitamins	Cofactor and vitamin metabolism	K00643 K01698 K01749 K01719 K01599 K00228 K00231 K01772	0.625	FALSE	K01698,K01719,K01772,K01599,K01749	4,111,649,447,172,340,000,000,000	None
118	WATER_MAG_00002	M00121	Heme biosynthesis, plants and bacteria, glutamate => heme	Pathway modules	Metabolism of cofactors and vitamins	Cofactor and vitamin metabolism	K01885 K02492 K01845 K01698 K01749 (K01719,K13542,K13543) K01599 (K00228,K02495) (K00230,K00231,K08973) K01772	1	TRUE	K08973,K02495,K02492,K01698,K01719,K01772,K01599,K01749,K01845,K01885	356,124,111,860,102,000,000,000,000,000,000,000,000,000,000,000,000,000,000,000	None
119	WATER_MAG_00002	M00926	Heme biosynthesis, bacteria, glutamyl-tRNA => coproporphyrin III => heme	Pathway modules	Metabolism of cofactors and vitamins	Cofactor and vitamin metabolism	K02492 K01845 K01698 K01749 (K01719,K13542) K01599 K00231 K01772 K00435	0.777777778	TRUE	K02492,K01698,K01719,K01772,K01599,K01749,K01845	6,010,245,696,411,160,000,000,000,000,000,000,000,000	None
120	WATER_MAG_00002	M00924	Cobalamin biosynthesis, anaerobic, uroporphyrinogen III => sirohydrochlorin => cobyrinate a,c-diamide	Pathway modules	Metabolism of cofactors and vitamins	Cofactor and vitamin metabolism	(K02302,(K02303,K13542) K02304) (K02190,K03795,K22011) K03394 (K05934,K13541,K21479) K05936 (K02189,K13541) K02188 K05895 (K02191 K03399,K00595) K06042 K02224	0.083333333	FALSE	K02304	27079	None
121	WATER_MAG_00002	M00117	Ubiquinone biosynthesis, prokaryotes, chorismate (+ polyprenyl-PP) => ubiquinol	Pathway modules	Metabolism of cofactors and vitamins	Cofactor and vitamin metabolism	(K03181,K18240) K03179 (K03182+K03186) K18800 K00568 K03185 K03183 K03184 K00568	0.222222222	FALSE	K03179,K03182,K03186	62,431,504,704,282	None
122	WATER_MAG_00002	M00930	Menaquinone biosynthesis, futalosine pathway	Pathway modules	Metabolism of cofactors and vitamins	Cofactor and vitamin metabolism	K11782 K18285 (K18286,K20810) K11783 K11784 K11785	0.666666667	FALSE	K11782,K11784,K20810,K11785	53,981,452,981,955,100,000	None
123	WATER_MAG_00002	M00931	Menaquinone biosynthesis, modified futalosine pathway	Pathway modules	Metabolism of cofactors and vitamins	Cofactor and vitamin metabolism	K11782 K18285 K18284 K11784 K11785	0.8	TRUE	K11782,K11784,K18284,K11785	5,398,145,298,839,910,000	None
124	WATER_MAG_00002	M00096	C5 isoprenoid biosynthesis, non-mevalonate pathway	Pathway modules	Biosynthesis of terpenoids and polyketides	Terpenoid backbone biosynthesis	K01662 K00099 (K00991,K12506) K00919 (K01770,K12506) K03526 K03527 K01823	0.625	FALSE	K03526,K12506,K01662,K03527	46,867,490,901,226,300,000	None
125	WATER_MAG_00002	M00778	Type II polyketide backbone biosynthesis, acyl-CoA + malonyl-CoA => polyketide	Pathway modules	Biosynthesis of terpenoids and polyketides	Type II polyketide biosynthesis	K05551+K05552+K05553 -K12420 ((K05554,K14249,K15884,K15885) (K05555,K14250),K15886)	0.333333333	FALSE	K05555	51566	No KOfam profile for K14249,No KOfam profile for K15886
126	WATER_MAG_00002	M00848	Aurachin biosynthesis, anthranilate => aurachin A	Pathway modules	Biosynthesis of other secondary metabolites	Biosynthesis of other antibiotics	K09460 K02078+K14245+K14246+K22798 K22799 K22800 K21272 K21271 K22801 K22802	0.03125	FALSE	K02078	62986	No KOfam profile for K09460,No KOfam profile for K14245,No KOfam profile for K14246,No KOfam profile for K22798,No KOfam profile for K22799,No KOfam profile for K22800,No KOfam profile for K21272,No KOfam profile for K21271,No KOfam profile for K22801,No KOfam profile for K22802
127	WATER_MAG_00002	M00569	Catechol meta-cleavage, catechol => acetyl-CoA / 4-methylcatechol => propanoyl-CoA	Pathway modules	Xenobiotics biodegradation	Aromatics degradation	(K00446,K07104) ((K10217 K01821 K01617),K10216) (K18364,K02554) (K18365,K01666) (K18366,K04073)	0.2	FALSE	K01666	9709	None
128	WATER_MAG_00002	M00545	Trans-cinnamate degradation, trans-cinnamate => acetyl-CoA	Pathway modules	Xenobiotics biodegradation	Aromatics degradation	(((K05708+K05709+K05710+K00529) K05711),K05712) K05713 K05714 K02554 K01666 K04073	0.166666667	FALSE	K01666	9709	None
129	WATER_MAG_00002	M00651	Vancomycin resistance, D-Ala-D-Lac type	Signature modules	Gene set	Drug resistance	(K18345 K18344 K07260 K18346),(K18351 K18352 K18354 K18353) (K18347 K15739 K08641)	0.142857143	FALSE	K18344	54251	No KOfam profile for K18354
130	WATER_MAG_00002	M00611	Oxygenic photosynthesis in plants and cyanobacteria	Signature modules	Module set	Metabolic capacity	(M00161,M00163) M00165	0.318181818	FALSE	K01808,K01624,K00134,K00615,K00927	5,186,462,922,104,920,000,000,000	No KOfam profile for M00161,No KOfam profile for M00163,No KOfam profile for M00165
131	WATER_MAG_00002	M00612	Anoxygenic photosynthesis in purple bacteria	Signature modules	Module set	Metabolic capacity	M00597 M00165	0.318181818	FALSE	K01808,K01624,K00134,K00615,K00927	5,186,462,922,104,920,000,000,000	No KOfam profile for M00165,No KOfam profile for M00597
132	WATER_MAG_00002	M00613	Anoxygenic photosynthesis in green nonsulfur bacteria	Signature modules	Module set	Metabolic capacity	M00597 M00376	0.08974359	FALSE	K01676,K14449,K01962,K00240,K00245,K00244,K00246,K02160,K01961,K01963	5,160,151,599,484,070,000,000,000,000,000,000,000,000,000,000,000	No KOfam profile for M00597,No KOfam profile for M00376
133	WATER_MAG_00002	M00614	Anoxygenic photosynthesis in green sulfur bacteria	Signature modules	Module set	Metabolic capacity	M00598 M00173	0.363636364	FALSE	K01676,K00240,K01007,K00245,K00244,K00246,K00169,K00024,K00174,K00175,K00171,K00170,K00172,K01682,K00177,K00031	5,160,127,347,399,770,000,000,000,000,000,000,000,000,000,000,000,000,000,000,000,000,000,000,000,000	No KOfam profile for M00598,No KOfam profile for M00173
134	WATER_MAG_00002	M00617	Methanogen	Signature modules	Module set	Metabolic capacity	M00567,M00357,M00356,M00563	0.166666667	FALSE	K00925	21307	None
135	WATER_MAG_00002	M00618	Acetogen	Signature modules	Module set	Metabolic capacity	M00377 M00579	0.321428571	FALSE	K01491,K00925	5,186,621,307	No KOfam profile for M00377,No KOfam profile for M00579
136	WATER_MAG_00002	M00615	Nitrate assimilation	Signature modules	Module set	Metabolic capacity	(K02575,K15576+K15577+K15578-K15579) M00531	0.5	FALSE	K15577,K02575	3,881,826,563	No KOfam profile for M00531
137	WATER_MAG_00002	M00616	Sulfate-sulfur assimilation	Signature modules	Module set	Metabolic capacity	(K02048,K23163)+K02046+K02047+K02045 M00176	0.277777778	FALSE	K00390,K00956,K00957	206,920,712,070	No KOfam profile for M00176
0	WATER_MAG_00003	M00001	Glycolysis (Embden-Meyerhof pathway), glucose => pyruvate	Pathway modules	Carbohydrate metabolism	Central carbohydrate metabolism	(K00844,K12407,K00845,K00886,K08074,K00918) (K01810,K06859,K13810,K15916) (K00850,K16370,K21071,K00918) (K01623,K01624,K11645,K16305,K16306) K01803 ((K00134,K00150) K00927,K11389) (K01834,K15633,K15634,K15635) K01689 (K00873,K12406)	0.8	TRUE	K00134,K00873,K15633,K11645,K01624,K01803,K01810,K01689,K00927	1,231,227,062,305,560,000,000,000,000,000,000,000,000,000,000,000,000,000	None
1	WATER_MAG_00003	M00002	Glycolysis, core module involving three-carbon compounds	Pathway modules	Carbohydrate metabolism	Central carbohydrate metabolism	K01803 ((K00134,K00150) K00927,K11389) (K01834,K15633,K15634,K15635) K01689 (K00873,K12406)	1	TRUE	K00134,K00873,K15633,K01803,K01689,K00927	1,231,227,062,305,560,000,000,000,000,000,000,000,000,000	None
2	WATER_MAG_00003	M00003	Gluconeogenesis, oxaloacetate => fructose-6P	Pathway modules	Carbohydrate metabolism	Central carbohydrate metabolism	(K01596,K01610) K01689 (K01834,K15633,K15634,K15635) K00927 (K00134,K00150) K01803 ((K01623,K01624,K11645) (K03841,K02446,K11532,K01086,K04041),K01622)	0.75	TRUE	K00134,K15633,K11645,K01624,K01803,K01689,K00927	12,312,414,823,176,300,000,000,000,000,000,000,000,000	None
3	WATER_MAG_00003	M00307	Pyruvate oxidation, pyruvate => acetyl-CoA	Pathway modules	Carbohydrate metabolism	Central carbohydrate metabolism	((K00163,K00161+K00162)+K00627+K00382-K13997),K00169+K00170+K00171+(K00172,K00189),K03737	0.25	FALSE	K00162	5151	None
4	WATER_MAG_00003	M00009	Citrate cycle (TCA cycle, Krebs cycle)	Pathway modules	Carbohydrate metabolism	Central carbohydrate metabolism	(K01647,K05942) (K01681,K01682) (K00031,K00030) (K00164+K00658+K00382,K00174+K00175-K00177-K00176) (K01902+K01903,K01899+K01900,K18118) (K00234+K00235+K00236+K00237,K00239+K00240+K00241-(K00242,K18859,K18860),K00244+K00245+K00246-K00247) (K01676,K01679,K01677+K01678) (K00026,K00025,K00024,K00116)	0.5	FALSE	K00116,K01679,K01647,K01682	4,657,614,455,590,740,000	None
5	WATER_MAG_00003	M00010	Citrate cycle, first carbon oxidation, oxaloacetate => 2-oxoglutarate	Pathway modules	Carbohydrate metabolism	Central carbohydrate metabolism	(K01647,K05942) (K01681,K01682) (K00031,K00030)	0.666666667	FALSE	K01647,K01682	5,590,741,384	None
6	WATER_MAG_00003	M00011	Citrate cycle, second carbon oxidation, 2-oxoglutarate => oxaloacetate	Pathway modules	Carbohydrate metabolism	Central carbohydrate metabolism	(K00164+K00658+K00382,K00174+K00175-K00177-K00176) (K01902+K01903,K01899+K01900,K18118) (K00234+K00235+K00236+K00237,K00239+K00240+K00241-(K00242,K18859,K18860),K00244+K00245+K00246-K00247) (K01676,K01679,K01677+K01678) (K00026,K00025,K00024,K00116)	0.4	FALSE	K00116,K01679	465,761,445	None
7	WATER_MAG_00003	M00004	Pentose phosphate pathway (Pentose phosphate cycle)	Pathway modules	Carbohydrate metabolism	Central carbohydrate metabolism	(K13937,((K00036,K19243) (K01057,K07404))) K00033 K01783 (K01807,K01808) K00615 K00616 (K01810,K06859,K13810,K15916)	0.75	TRUE	K00036,K00615,K01783,K01810,K01057,K00616	31,168,359,545,233,000,000,000,000,000,000	None
8	WATER_MAG_00003	M00006	Pentose phosphate pathway, oxidative phase, glucose 6P => ribulose 5P	Pathway modules	Carbohydrate metabolism	Central carbohydrate metabolism	(K13937,((K00036,K19243) (K01057,K07404))) K00033	0.666666667	FALSE	K00036,K01057	311,685,895,462,836	None
9	WATER_MAG_00003	M00007	Pentose phosphate pathway, non-oxidative phase, fructose 6P => ribose 5P	Pathway modules	Carbohydrate metabolism	Central carbohydrate metabolism	K00615 (K00616,K13810) K01783 (K01807,K01808)	0.75	TRUE	K00615,K01783,K00616	3,595,452,364,553	None
10	WATER_MAG_00003	M00008	Entner-Doudoroff pathway, glucose-6P => glyceraldehyde-3P + pyruvate	Pathway modules	Carbohydrate metabolism	Central carbohydrate metabolism	K00036 (K01057,K07404) K01690 K01625	0.5	FALSE	K00036,K01057	311,685,895,462,836	None
11	WATER_MAG_00003	M00308	Semi-phosphorylative Entner-Doudoroff pathway, gluconate => glycerate-3P	Pathway modules	Carbohydrate metabolism	Central carbohydrate metabolism	K05308 K00874 K01625 (K00134 K00927,K00131,K18978)	0.4	FALSE	K00134,K00927	123,126,412,911,057	None
12	WATER_MAG_00003	M00632	Galactose degradation, Leloir pathway, galactose => alpha-D-glucose-1P	Pathway modules	Carbohydrate metabolism	Other carbohydrate metabolism	K01785 K00849 K00965 K01784	0.25	FALSE	K01785	39832	None
13	WATER_MAG_00003	M00552	D-galactonate degradation, De Ley-Doudoroff pathway, D-galactonate => glycerate-3P	Pathway modules	Carbohydrate metabolism	Other carbohydrate metabolism	K01684 K00883 K01631 K00134 K00927	0.4	FALSE	K00134,K00927	123,126,412,911,057	None
14	WATER_MAG_00003	M00129	Ascorbate biosynthesis, animals, glucose-1P => ascorbate	Pathway modules	Carbohydrate metabolism	Other carbohydrate metabolism	K00963 K00012 K00699 K01195 K00002 K01053 K00103	0.142857143	FALSE	K01053	3,470,614,025	None
15	WATER_MAG_00003	M00854	Glycogen biosynthesis, glucose-1P => glycogen/starch	Pathway modules	Carbohydrate metabolism	Other carbohydrate metabolism	(K00963 (K00693+K00750,K16150,K16153,K13679,K20812)),(K00975 (K00703,K13679,K20812)) (K00700,K16149)	1	TRUE	K00975,K16149,K00703,K00700	293,562,262,333,495,000,000,000,000,000,000,000,000	None
16	WATER_MAG_00003	M00855	Glycogen degradation, glycogen => glucose-6P	Pathway modules	Carbohydrate metabolism	Other carbohydrate metabolism	(K00688,K16153) (K01196,((K00705,K22451) (K02438,K01200))) (K15779,K01835,K15778)	0.75	TRUE	K01835,K00688,K00705	94,279,633,491,873,500,000,000	None
17	WATER_MAG_00003	M00565	Trehalose biosynthesis, D-glucose 1P => trehalose	Pathway modules	Carbohydrate metabolism	Other carbohydrate metabolism	K00975 K00703 (K00700,K16149) K01214 K06044 K01236	0.5	FALSE	K00975,K16149,K00703,K00700	293,562,262,333,495,000,000,000,000,000,000,000,000	None
18	WATER_MAG_00003	M00549	Nucleotide sugar biosynthesis, glucose => UDP-glucose	Pathway modules	Carbohydrate metabolism	Other carbohydrate metabolism	(K00844,K00845,K12407,K00886) (K01835,K15779,K15778) (K00963,K12447)	0.333333333	FALSE	K01835	94,274,918,735,457	None
19	WATER_MAG_00003	M00892	UDP-N-acetyl-D-glucosamine biosynthesis, eukaryotes, glucose => UDP-GlcNAc	Pathway modules	Carbohydrate metabolism	Other carbohydrate metabolism	(K00844,K12407,K00845) K01810 K00820 K00621 K01836 K00972	0.333333333	FALSE	K01810,K00820	303,061,324	None
20	WATER_MAG_00003	M00909	UDP-N-acetyl-D-glucosamine biosynthesis, prokaryotes, glucose => UDP-GlcNAc	Pathway modules	Carbohydrate metabolism	Other carbohydrate metabolism	K00845 (K01810,K13810,K15916) K00820 K03431 K04042	0.6	FALSE	K01810,K00820,K03431	30,306,132,462,158	None
21	WATER_MAG_00003	M00012	Glyoxylate cycle	Pathway modules	Carbohydrate metabolism	Other carbohydrate metabolism	K01647 (K01681,K01682) K01637 (K01638,K19282) (K00026,K00025,K00024)	0.4	FALSE	K01647,K01682	5,590,741,384	None
22	WATER_MAG_00003	M00740	Methylaspartate cycle	Pathway modules	Carbohydrate metabolism	Other carbohydrate metabolism	K01647 K01681 K00031 K00261 K19268+K01846 K04835 K19280 K14449 K19281 K19282 K00024	0.090909091	FALSE	K01647	55907	None
23	WATER_MAG_00003	M00532	Photorespiration	Pathway modules	Carbohydrate metabolism	Other carbohydrate metabolism	(K01601-K01602) K19269 K11517 K03781 K14272 K00600 K00830 (K15893,K15919) K15918 K00281+K00605+K00382+K02437	0.15	FALSE	K01602,K00830,K02437,K00281	2,389,778,135,424,750,000	None
24	WATER_MAG_00003	M00131	Inositol phosphate metabolism, Ins(1,3,4,5)P4 => Ins(1,3,4)P3 => myo-inositol	Pathway modules	Carbohydrate metabolism	Other carbohydrate metabolism	K01106 K01107 K01109 K01092	0.25	FALSE	K01092	63244	None
25	WATER_MAG_00003	M00165	Reductive pentose phosphate cycle (Calvin cycle)	Pathway modules	Energy metabolism	Carbon fixation	K00855 (K01601-K01602) K00927 (K05298,K00150,K00134) (K01623,K01624) (K03841,K02446,K11532,K01086) K00615 (K01623,K01624) (K01100,K11532,K01086) K00615 (K01807,K01808)	0.636363636	FALSE	K00134,K01602,K00615,K01624,K00855,K00927	123,122,389,735,956,000,000,000,000,000,000	No KOfam profile for M00165
26	WATER_MAG_00003	M00166	Reductive pentose phosphate cycle, ribulose-5P => glyceraldehyde-3P	Pathway modules	Energy metabolism	Carbon fixation	K00855 (K01601-K01602) K00927 (K05298,K00150,K00134)	0.75	TRUE	K00134,K01602,K00855,K00927	1,231,223,897,535,430,000,000,000	None
27	WATER_MAG_00003	M00167	Reductive pentose phosphate cycle, glyceraldehyde-3P => ribulose-5P	Pathway modules	Energy metabolism	Carbon fixation	(K01623,K01624) (K03841,K02446,K11532,K01086) K00615 (K01623,K01624) (K01100,K11532,K01086) K00615 (K01807,K01808)	0.571428571	FALSE	K00615,K01624	35,956,338	None
28	WATER_MAG_00003	M00168	CAM (Crassulacean acid metabolism), dark	Pathway modules	Energy metabolism	Carbon fixation	K01595 (K00025,K00026,K00024)	0.5	FALSE	K01595	44274	None
29	WATER_MAG_00003	M00172	C4-dicarboxylic acid cycle, NADP - malic enzyme type	Pathway modules	Energy metabolism	Carbon fixation	K01595 K00051 K00029 K01006	0.25	FALSE	K01595	44274	None
30	WATER_MAG_00003	M00171	C4-dicarboxylic acid cycle, NAD - malic enzyme type	Pathway modules	Energy metabolism	Carbon fixation	K01595 K14454 K14455 (K00025,K00026) K00028 (K00814,K14272) K01006	0.142857143	FALSE	K01595	44274	None
31	WATER_MAG_00003	M00170	C4-dicarboxylic acid cycle, phosphoenolpyruvate carboxykinase type	Pathway modules	Energy metabolism	Carbon fixation	K01595 K14454 K14455 K01610	0.25	FALSE	K01595	44274	None
32	WATER_MAG_00003	M00173	Reductive citrate cycle (Arnon-Buchanan cycle)	Pathway modules	Energy metabolism	Carbon fixation	(K00169+K00170+K00171+K00172,K03737) ((K01007,K01006) K01595,K01959+K01960,K01958) K00024 (K01676,K01679,K01677+K01678) (K00239+K00240-K00241-K00242,K00244+K00245-K00246-K00247,K18556+K18557+K18558+K18559+K18560) (K01902+K01903) (K00174+K00175-K00177-K00176) K00031 (K01681,K01682) (K15230+K15231,K15232+K15233 K15234)	0.272727273	FALSE	K01679,K01682,K01595	614,454,138,444,274	No KOfam profile for M00173
33	WATER_MAG_00003	M00376	3-Hydroxypropionate bi-cycle	Pathway modules	Energy metabolism	Carbon fixation	(K02160+K01961+K01962+K01963) K14468 K14469 K15052 K05606 (K01847,K01848+K01849) (K14471+K14472) (K00239+K00240+K00241) K01679 K08691 K14449 K14470 K09709	0.115384615	FALSE	K01679,K01962,K01963	614,453,848,047,614	No KOfam profile for M00376
34	WATER_MAG_00003	M00374	Dicarboxylate-hydroxybutyrate cycle	Pathway modules	Energy metabolism	Carbon fixation	(K00169+K00170+K00171+K00172) K01007 K01595 K00024 (K01677+K01678) (K00239+K00240-K00241-K18860) (K01902+K01903) (K15038,K15017) K14465 (K14467,K18861) K14534 K15016 K00626	0.076923077	FALSE	K01595	44274	None
35	WATER_MAG_00003	M00579	Phosphate acetyltransferase-acetate kinase pathway, acetyl-CoA => acetate	Pathway modules	Energy metabolism	Carbon fixation	(K00625,K13788,K15024) K00925	0.5	FALSE	K00925	5,995,142,962	No KOfam profile for M00579
36	WATER_MAG_00003	M00357	Methanogenesis, acetate => methane	Pathway modules	Energy metabolism	Methane metabolism	((K00925 K00625),K01895) (K00193+K00197+K00194) (K00577+K00578+K00579+K00580+K00581-K00582-K00583+K00584) (K00399+K00401+K00402) (K22480+K22481+K22482,K03388+K03389+K03390,K08264+K08265,K03388+K03389+K03390+K14127+(K14126+K14128,K22516+K00125))	0.166666667	FALSE	K00925	5,995,142,962	None
37	WATER_MAG_00003	M00358	Coenzyme M biosynthesis	Pathway modules	Energy metabolism	Methane metabolism	K08097 K05979 K05884 K13039+K06034	0.25	FALSE	K05979	2,052,452,093	None
38	WATER_MAG_00003	M00346	Formaldehyde assimilation, serine pathway	Pathway modules	Energy metabolism	Methane metabolism	K00600 K00830 K00018 K11529 K01689 K01595 K00024 K08692+K14067 K08691	0.333333333	FALSE	K00830,K01689,K01595	78,135,135,544,274	None
39	WATER_MAG_00003	M00345	Formaldehyde assimilation, ribulose monophosphate pathway	Pathway modules	Energy metabolism	Methane metabolism	(((K08093,K13812) K08094),K13831) (K00850,K16370) K01624	0.333333333	FALSE	K01624	6338	None
40	WATER_MAG_00003	M00344	Formaldehyde assimilation, xylulose monophosphate pathway	Pathway modules	Energy metabolism	Methane metabolism	K17100 K00863 K01624 K03841	0.25	FALSE	K01624	6338	None
41	WATER_MAG_00003	M00531	Assimilatory nitrate reduction, nitrate => ammonia	Pathway modules	Energy metabolism	Nitrogen metabolism	(K00367,K10534,K00372-K00360) (K00366,K17877)	0.5	FALSE	K00366	44262	No KOfam profile for M00531
42	WATER_MAG_00003	M00176	Assimilatory sulfate reduction, sulfate => H2S	Pathway modules	Energy metabolism	Sulfur metabolism	(K13811,K00958+K00860,K00955+K00957,K00956+K00957+K00860) K00390 (K00380+K00381,K00392)	0.833333333	TRUE	K00390,K00958,K00392	137,953,589,839,300	No KOfam profile for M00176
43	WATER_MAG_00003	M00596	Dissimilatory sulfate reduction, sulfate => H2S	Pathway modules	Energy metabolism	Sulfur metabolism	K00958 (K00394+K00395) (K11180+K11181)	0.333333333	FALSE	K00958	35898	None
44	WATER_MAG_00003	M00161	Photosystem II	Pathway modules	Energy metabolism	Photosynthesis	K02703+K02706+K02705+K02704+K02707+K02708	0.166666667	FALSE	K02703	49108	No KOfam profile for M00161
45	WATER_MAG_00003	M00163	Photosystem I	Pathway modules	Energy metabolism	Photosynthesis	K02689+K02690+K02691+K02692+K02693+K02694	0.833333333	TRUE	K02693,K02692,K02694,K02691,K02689	1,163,413,365,590,570,000,000,000	No KOfam profile for M00163
46	WATER_MAG_00003	M00144	NADH:quinone oxidoreductase, prokaryotes	Pathway modules	Energy metabolism	ATP synthesis	K00330+(K00331+K00332+K00333,K00331+K13378,K13380)+K00334+K00335+K00336+K00337+K00338+K00339+K00340+(K00341+K00342)+K00343	0.25	FALSE	K00337,K00340,K00339	559,085,834,452,412	None
47	WATER_MAG_00003	M00145	NAD(P)H:quinone oxidoreductase, chloroplasts and cyanobacteria	Pathway modules	Energy metabolism	ATP synthesis	K05574+K05582+K05581+K05579+K05572+K05580+K05578+K05576+K05577+K05575+K05573-K05583-K05584-K05585	0.545454545	FALSE	K05575,K05579,K05584,K05576,K05572,K05580,K05578,K05585	4,790,294,531,012,580,000,000,000,000,000,000,000,000,000	None
48	WATER_MAG_00003	M00162	Cytochrome b6f complex	Pathway modules	Energy metabolism	ATP synthesis	K02635+K02637+K02634+K02636+K02642+K02643+K03689+K02640	0.5	FALSE	K02643,K02640,K02636,K02634	25,489,477,405,368,400,000	None
49	WATER_MAG_00003	M00154	Cytochrome c oxidase	Pathway modules	Energy metabolism	ATP synthesis	(K02257+K02262+K02256+K02261+K02263+K02264+K02265+K02266+K02267+K02268+K02270-K02271+K02272-K02273+K02258+K02259+K02260)	0.133333333	FALSE	K02257,K02259	4,618,446,185	None
50	WATER_MAG_00003	M00155	Cytochrome c oxidase, prokaryotes	Pathway modules	Energy metabolism	ATP synthesis	K02275+(K02274+K02276,K15408)-K02277	1	TRUE	K02276,K02275,K02274	1,771,446,186,468,410,000,000,000	None
51	WATER_MAG_00003	M00157	F-type ATPase, prokaryotes and chloroplasts	Pathway modules	Energy metabolism	ATP synthesis	K02111+K02112+K02113+K02114+K02115+K02108+K02109+K02110	1	TRUE	K02109,K02108,K02111,K02110,K02113,K02114,K02115,K02112	5,963,596,259,602,050,000,000,000,000,000,000,000,000,000,000,000	None
52	WATER_MAG_00003	M00082	Fatty acid biosynthesis, initiation	Pathway modules	Lipid metabolism	Fatty acid metabolism	(K11262,(K02160+K01961,K11263)+(K01962+K01963,K18472)) (K00665,K00667+K00668,K11533,(K00645 (K00648,K18473)))	0.333333333	FALSE	K01962,K01963	3,848,047,614	None
53	WATER_MAG_00003	M00083	Fatty acid biosynthesis, elongation	Pathway modules	Lipid metabolism	Fatty acid metabolism	K00665,(K00667 K00668),K11533,((K00647,K09458) K00059 (K02372,K01716,K16363) (K00208,K02371,K10780,K00209))	0.5	FALSE	K02372,K00059	12,496,198,263,037,600,000	None
54	WATER_MAG_00003	M00874	Fatty acid biosynthesis in mitochondria, fungi	Pathway modules	Lipid metabolism	Fatty acid metabolism	K11262 K03955+K00645 K09458 K00059 K22541 K07512	0.166666667	FALSE	K00059	3,037,647,906	None
55	WATER_MAG_00003	M00086	beta-Oxidation, acyl-CoA synthesis	Pathway modules	Lipid metabolism	Fatty acid metabolism	K01897,K15013	1	TRUE	K01897	62136	None
56	WATER_MAG_00003	M00089	Triacylglycerol biosynthesis	Pathway modules	Lipid metabolism	Lipid metabolism	(K00629,K13506,K13507,K00630,K13508) (K00655,K13509,K13523,K19007,K13513,K13517,K13519,K14674,K22831) (K01080,K15728,K18693) (K11155,K11160,K14456,K22848,K22849)	0.25	FALSE	K00655	37245	None
57	WATER_MAG_00003	M00098	Acylglycerol degradation	Pathway modules	Lipid metabolism	Lipid metabolism	(K01046,K12298,K16816,K13534,K14073,K14074,K14075,K14076,K22283,K14452,K22284,K14674,K14675,K17900) K01054	0.5	FALSE	K01046	253,083,256,557,740	None
58	WATER_MAG_00003	M00093	Phosphatidylethanolamine (PE) biosynthesis, PA => PS => PE	Pathway modules	Lipid metabolism	Lipid metabolism	K00981 (K00998,K17103) K01613	0.333333333	FALSE	K00981	40975	None
59	WATER_MAG_00003	M00048	Inosine monophosphate biosynthesis, PRPP + glutamine => IMP	Pathway modules	Nucleotide metabolism	Purine metabolism	K00764 (K01945,K11787,K11788,K13713) (K00601,K11175,K08289,K11787,K01492) (K01952,(K23269+K23264+K23265),(K23270+K23265)) (K01933,K11787,K11788 (K01587,K11808,K01589 K01588)) (K01923,K01587,K13713) K01756 (K00602,(K01492,K06863 K11176))	0.708333333	FALSE	K23265,K01588,K23264,K11175,K01933,K00602,K01589,K00764,K08289,K01756	209,884,703,209,872,000,000,000,000,000,000,000,000,000,000,000,000,000	None
60	WATER_MAG_00003	M00049	Adenine ribonucleotide biosynthesis, IMP => ADP,ATP	Pathway modules	Nucleotide metabolism	Purine metabolism	K01939 K01756 (K00939,K18532,K18533,K00944) (K00940,K00873,K12406)	1	TRUE	K00873,K00940,K00939,K01939,K01756	2,706,230,556,362,600,000,000,000,000	None
61	WATER_MAG_00003	M00050	Guanine ribonucleotide biosynthesis IMP => GDP,GTP	Pathway modules	Nucleotide metabolism	Purine metabolism	K00088 K01951 K00942 (K00940,K18533,K00873,K12406)	1	TRUE	K00873,K01951,K00940,K00942,K00088	2,706,230,556,228,430,000,000,000,000,000	None
62	WATER_MAG_00003	M00051	Uridine monophosphate biosynthesis, glutamine (+ PRPP) => UMP	Pathway modules	Nucleotide metabolism	Pyrimidine metabolism	(K11540,(K11541 K01465),((K01954,K01955+K01956) (K00609+K00610,K00608) K01465)) (K00226,K00254,K17828) (K13421,K00762 K01591)	0.333333333	FALSE	K00609,K01956,K00762	186,014,835,660,418,000,000,000	None
63	WATER_MAG_00003	M00052	Pyrimidine ribonucleotide biosynthesis, UMP => UDP/UTP,CDP/CTP	Pathway modules	Nucleotide metabolism	Pyrimidine metabolism	(K13800,K13809,K09903) (K00940,K18533) K01937	0.666666667	FALSE	K00940,K01937	36,248,930	None
64	WATER_MAG_00003	M00053	Pyrimidine deoxyribonuleotide biosynthesis, CDP/CTP => dCDP/dCTP,dTDP/dTTP	Pathway modules	Nucleotide metabolism	Pyrimidine metabolism	(K00524,K00525+K00526,K10807+K10808) (K00940,K18533) (K00527,K21636) K01494 K01520 (K00560,K13998) K00943 K00940	0.625	FALSE	K00524,K00943,K00940,K01494	997,828,219,362,442,000,000	None
65	WATER_MAG_00003	M00020	Serine biosynthesis, glycerate-3P => serine	Pathway modules	Amino acid metabolism	Serine and threonine metabolism	K00058 K00831 (K01079,K02203,K22305)	0.666666667	FALSE	K22305,K00058	1,476,021,620	None
66	WATER_MAG_00003	M00018	Threonine biosynthesis, aspartate => homoserine => threonine	Pathway modules	Amino acid metabolism	Serine and threonine metabolism	(K00928,K12524,K12525,K12526) K00133 (K00003,K12524,K12525) (K00872,K02204,K02203) K01733	0.8	TRUE	K00133,K01733,K00872,K00003,K02204	2,190,410,283,528,410,000,000,000	None
67	WATER_MAG_00003	M00033	Ectoine biosynthesis, aspartate => ectoine	Pathway modules	Amino acid metabolism	Serine and threonine metabolism	K00928 K00133 K00836 K06718 K06720	0.2	FALSE	K00133	21904	None
68	WATER_MAG_00003	M00021	Cysteine biosynthesis, serine => cysteine	Pathway modules	Amino acid metabolism	Cysteine and methionine metabolism	(K00640,K23304) (K01738,K13034,K17069)	1	TRUE	K00640,K01738	28,650,469,772,034	None
69	WATER_MAG_00003	M00609	Cysteine biosynthesis, methionine => cysteine	Pathway modules	Amino acid metabolism	Cysteine and methionine metabolism	K00789 K17462 K01243 K07173 K17216 K17217	0.333333333	FALSE	K00789,K01243	3,206,739,180,755	None
70	WATER_MAG_00003	M00017	Methionine biosynthesis, apartate => homoserine => methionine	Pathway modules	Amino acid metabolism	Cysteine and methionine metabolism	(K00928,K12524,K12525) K00133 (K00003,K12524,K12525) (K00651,K00641) K01739 (K01760,K14155) (K00548,K24042,K00549)	0.571428571	FALSE	K00133,K00003,K00548,K00651	21,904,571,485,138,100,000	None
71	WATER_MAG_00003	M00034	Methionine salvage pathway	Pathway modules	Amino acid metabolism	Cysteine and methionine metabolism	K00789 K01611 K00797 ((K01243,K01244) K00899,K00772) K08963 (K16054,K08964 (K09880,K08965 K08966)) K08967 (K00815,K08969,K23977,K00832,K00838)	0.777777778	TRUE	K08964,K00772,K00789,K08967,K01611,K08963,K01243,K09880	1,163,621,707,320,670,000,000,000,000,000,000,000,000,000	None
72	WATER_MAG_00003	M00035	Methionine degradation	Pathway modules	Amino acid metabolism	Cysteine and methionine metabolism	K00789 (K00558,K17398,K17399) K01251 (K01697,K10150)	0.5	FALSE	K00789,K01251	320,671,766,839,180	None
73	WATER_MAG_00003	M00368	Ethylene biosynthesis, methionine => ethylene	Pathway modules	Amino acid metabolism	Cysteine and methionine metabolism	K00789 (K01762,K20772) K05933	0.333333333	FALSE	K00789	3,206,739,180	None
74	WATER_MAG_00003	M00019	Valine/isoleucine biosynthesis, pyruvate => valine / 2-oxobutanoate => isoleucine	Pathway modules	Amino acid metabolism	Branched-chain amino acid metabolism	K01652+(K01653,K11258) K00053 K01687 K00826	0.75	TRUE	K01687,K01652,K00826,K01653	799,929,196,513,821,000,000,000	None
75	WATER_MAG_00003	M00535	Isoleucine biosynthesis, pyruvate => 2-oxobutanoate	Pathway modules	Amino acid metabolism	Branched-chain amino acid metabolism	K09011 K01703+K01704 K00052	0.333333333	FALSE	K00052	53544	None
76	WATER_MAG_00003	M00570	Isoleucine biosynthesis, threonine => 2-oxobutanoate => isoleucine	Pathway modules	Amino acid metabolism	Branched-chain amino acid metabolism	(K17989,K01754) K01652+(K01653,K11258) K00053 K01687 K00826	0.6	FALSE	K01687,K01652,K00826,K01653	799,929,196,513,821,000,000,000	None
77	WATER_MAG_00003	M00432	Leucine biosynthesis, 2-oxoisovalerate => 2-oxoisocaproate	Pathway modules	Amino acid metabolism	Branched-chain amino acid metabolism	K01649 (K01702,K01703+K01704) K00052	0.666666667	FALSE	K00052,K01649	5,354,456,071	None
78	WATER_MAG_00003	M00036	Leucine degradation, leucine => acetoacetate + acetyl-CoA	Pathway modules	Amino acid metabolism	Branched-chain amino acid metabolism	K00826 ((K00166+K00167,K11381)+K09699+K00382) (K00253,K00249) (K01968+K01969) (K05607,K13766) K01640	0.166666667	FALSE	K00826	51382	None
79	WATER_MAG_00003	M00016	Lysine biosynthesis, succinyl-DAP pathway, aspartate => lysine	Pathway modules	Amino acid metabolism	Lysine metabolism	(K00928,K12524,K12525,K12526) K00133 K01714 K00215 K00674 (K00821,K14267) K01439 K01778 (K01586,K12526)	0.555555556	FALSE	K00133,K00215,K01714,K01778,K01586	219,042,746,739,736,000,000,000,000,000	None
80	WATER_MAG_00003	M00525	Lysine biosynthesis, acetyl-DAP pathway, aspartate => lysine	Pathway modules	Amino acid metabolism	Lysine metabolism	K00928 K00133 K01714 K00215 K05822 K00841 K05823 K01778 K01586	0.555555556	FALSE	K00133,K00215,K01714,K01778,K01586	219,042,746,739,736,000,000,000,000,000	None
81	WATER_MAG_00003	M00526	Lysine biosynthesis, DAP dehydrogenase pathway, aspartate => lysine	Pathway modules	Amino acid metabolism	Lysine metabolism	(K00928,K12524,K12525,K12526) K00133 K01714 K00215 K03340 (K01586,K12526)	0.666666667	FALSE	K00133,K00215,K01714,K01586	2,190,427,467,397,360,000,000,000	None
82	WATER_MAG_00003	M00527	Lysine biosynthesis, DAP aminotransferase pathway, aspartate => lysine	Pathway modules	Amino acid metabolism	Lysine metabolism	(K00928,K12524,K12525,K12526) K00133 K01714 K00215 K10206 K01778 (K01586,K12526)	0.714285714	FALSE	K00133,K00215,K01714,K01778,K01586	219,042,746,739,736,000,000,000,000,000	None
83	WATER_MAG_00003	M00028	Ornithine biosynthesis, glutamate => ornithine	Pathway modules	Amino acid metabolism	Arginine and proline metabolism	(K00618,K00619,K14681,K14682,K00620,K22477,K22478) ((K00930,K22478) K00145,K12659) (K00818,K00821) (K01438,K14677,K00620)	0.4	FALSE	K00930,K00145	5,055,124,469	None
84	WATER_MAG_00003	M00844	Arginine biosynthesis, ornithine => arginine	Pathway modules	Amino acid metabolism	Arginine and proline metabolism	K00611 K01940 (K01755,K14681)	0.666666667	FALSE	K01940,K00611	337,193,726,855,759	None
85	WATER_MAG_00003	M00845	Arginine biosynthesis, glutamate => acetylcitrulline => arginine	Pathway modules	Amino acid metabolism	Arginine and proline metabolism	K22478 K00145 K00821 K09065 K01438 K01940 K01755	0.285714286	FALSE	K01940,K00145	337,193,726,824,469	None
86	WATER_MAG_00003	M00029	Urea cycle	Pathway modules	Amino acid metabolism	Arginine and proline metabolism	K01948 K00611 K01940 (K01755,K14681) K01476	0.4	FALSE	K01940,K00611	337,193,726,855,759	None
87	WATER_MAG_00003	M00015	Proline biosynthesis, glutamate => proline	Pathway modules	Amino acid metabolism	Arginine and proline metabolism	((K00931 K00147),K12657) K00286	0.666666667	FALSE	K00931,K00286	535,465,498,261,577	None
88	WATER_MAG_00003	M00133	Polyamine biosynthesis, arginine => agmatine => putrescine => spermidine	Pathway modules	Amino acid metabolism	Polyamine biosynthesis	(K01583,K01584,K01585,K02626) K01480 K01611 K00797	0.75	TRUE	K01480,K01611,K01585	28,671,442,786,209,300,000,000,000,000	None
89	WATER_MAG_00003	M00026	Histidine biosynthesis, PRPP => histidine	Pathway modules	Amino acid metabolism	Histidine metabolism	(K00765-K02502) (K01523 K01496,K11755,K14152) (K01814,K24017) (K02501+K02500,K01663) ((K01693 K00817 (K04486,K05602,K18649)),(K01089 K00817)) (K00013,K14152)	0.5	FALSE	K00765,K01496,K11755,K00817,K02501,K02502	28,863,313,906,077,800,000,000,000,000	None
90	WATER_MAG_00003	M00022	Shikimate pathway, phosphoenolpyruvate + erythrose-4P => chorismate	Pathway modules	Amino acid metabolism	Aromatic amino acid metabolism	(K01626,K03856,K13853) (((K01735,K13829) ((K03785,K03786) K00014,K13832)),K13830) ((K00891,K13829) (K00800,K24018),K13830) K01736	0.666666667	FALSE	K01736,K03786,K00014,K01626	1,402,616,305,456,060,000,000,000	None
91	WATER_MAG_00003	M00023	Tryptophan biosynthesis, chorismate => tryptophan	Pathway modules	Amino acid metabolism	Aromatic amino acid metabolism	(((K01657+K01658,K13503,K13501,K01656) K00766),K13497) (((K01817,K24017) (K01656,K01609)),K13498,K13501) (K01695+(K01696,K06001),K01694)	0.375	FALSE	K00766,K01657	95,851,102,848,357	None
92	WATER_MAG_00003	M00024	Phenylalanine biosynthesis, chorismate => phenylpyruvate => phenylalanine	Pathway modules	Amino acid metabolism	Aromatic amino acid metabolism	((K01850,K04092,K14187,K04093,K04516,K06208,K06209) (K01713,K04518,K05359),K14170) (K00832,K00838)	0.333333333	FALSE	K04518	6987	None
93	WATER_MAG_00003	M00936	Melatonin biosynthesis, plants, tryptophan => serotonin => melatonin	Pathway modules	Amino acid metabolism	Aromatic amino acid metabolism	K01593 K24541 K22450 (K22588,K13066)	0.25	FALSE	K22450	44275	None
94	WATER_MAG_00003	M00027	GABA (gamma-Aminobutyrate) shunt	Pathway modules	Amino acid metabolism	Other amino acid metabolism	K01580 (K13524,K07250,K00823,K16871) (K00135,K00139,K17761)	0.333333333	FALSE	K01580	26675	None
95	WATER_MAG_00003	M00060	KDO2-lipid A biosynthesis, Raetz pathway, LpxL-LpxM type	Pathway modules	Glycan metabolism	Lipopolysaccharide metabolism	K00677 K02535 K02536 (K03269,K09949) K00748 K00912 K02527 K02517 K02560	0.555555556	FALSE	K00748,K00677,K02536,K03269,K02535	207,011,249,412,495,000,000,000,000,000	None
96	WATER_MAG_00003	M00866	KDO2-lipid A biosynthesis, Raetz pathway, non-LpxL-LpxM type	Pathway modules	Glycan metabolism	Lipopolysaccharide metabolism	K00677 (K02535,K16363) K02536 (K03269,K09949) K00748 K00912 K02527 K02517 K09778	0.555555556	FALSE	K00748,K00677,K02536,K03269,K02535	207,011,249,412,495,000,000,000,000,000	None
97	WATER_MAG_00003	M00063	CMP-KDO biosynthesis	Pathway modules	Glycan metabolism	Lipopolysaccharide metabolism	K06041 K01627 K03270 K00979	1	TRUE	K00979,K01627,K03270,K06041	266,454,371,660,242,000,000,000,000,000	None
98	WATER_MAG_00003	M00127	Thiamine biosynthesis, prokaryotes, AIR (+ DXP/tyrosine) => TMP/TPP	Pathway modules	Metabolism of cofactors and vitamins	Cofactor and vitamin metabolism	K03148+K03154 K03151 K03150 K03149 K03147 ((K00941 K00788),K14153,K21219) K00946	0.285714286	FALSE	K03147,K03149	1,950,341,630	None
99	WATER_MAG_00003	M00895	Thiamine biosynthesis, prokaryotes, AIR (+ DXP/glycine) => TMP/TPP	Pathway modules	Metabolism of cofactors and vitamins	Cofactor and vitamin metabolism	K03148+K03154 K03151 K03153 K03149 K10810 K03147 K00941 K00788 K00946	0.222222222	FALSE	K03147,K03149	1,950,341,630	None
100	WATER_MAG_00003	M00896	Thiamine biosynthesis, archaea, AIR (+ NAD+) => TMP/TPP	Pathway modules	Metabolism of cofactors and vitamins	Cofactor and vitamin metabolism	K22699 K03147 (K00941 (K00788,K21220),K21219) K00946	0.25	FALSE	K03147	19503	None
101	WATER_MAG_00003	M00897	Thiamine biosynthesis, plants, AIR (+ NAD+) => TMP/thiamine/TPP	Pathway modules	Metabolism of cofactors and vitamins	Cofactor and vitamin metabolism	K03146 K03147 K14153 K22911 K00949	0.2	FALSE	K03147	19503	None
102	WATER_MAG_00003	M00125	Riboflavin biosynthesis, plants and bacteria, GTP => riboflavin/FMN/FAD	Pathway modules	Metabolism of cofactors and vitamins	Cofactor and vitamin metabolism	(K01497,K14652) (K01498 K00082,K11752) (K22912,K20860,K20861,K20862,K21063,K21064) (K02858,K14652) K00794 K00793 (K20884 K22949,K11753)	0.714285714	FALSE	K14652,K01497,K11752,K02858,K00793,K00794	3,269,623,100,636,100,000,000,000	None
103	WATER_MAG_00003	M00911	Riboflavin biosynthesis, fungi, GTP => riboflavin/FMN/FAD	Pathway modules	Metabolism of cofactors and vitamins	Cofactor and vitamin metabolism	K01497 K14654 K14655 -- K02858 K00794 K00793 K00861 K00953	0.444444444	FALSE	K01497,K02858,K00793,K00794	32,696,636,104,683,800,000	'--' steps are assumed incomplete
104	WATER_MAG_00003	M00124	Pyridoxal-P biosynthesis, erythrose-4P => pyridoxal-P	Pathway modules	Metabolism of cofactors and vitamins	Cofactor and vitamin metabolism	K03472 K03473 K00831 K00097 K03474 K00275	0.333333333	FALSE	K00275,K03474	2,557,063,597	None
105	WATER_MAG_00003	M00115	NAD biosynthesis, aspartate => quinolinate => NAD	Pathway modules	Metabolism of cofactors and vitamins	Cofactor and vitamin metabolism	(K00278,K06989) K03517 K00767 (K00969,K06210) (K01916,K01950)	0.4	FALSE	K00278,K00969	2,105,059,530	None
106	WATER_MAG_00003	M00912	NAD biosynthesis, tryptophan => quinolinate => NAD	Pathway modules	Metabolism of cofactors and vitamins	Cofactor and vitamin metabolism	(K00453,K00463) (K01432,K14263,K07130) K00486 K01556 K00452 K00767 (K00969,K06210) (K01916,K01950)	0.125	FALSE	K00969	59530	None
107	WATER_MAG_00003	M00119	Pantothenate biosynthesis, valine/L-aspartate => pantothenate	Pathway modules	Metabolism of cofactors and vitamins	Cofactor and vitamin metabolism	K00826 K00606 K00077 K01579 (K01918,K13799)	0.4	FALSE	K13799,K01918,K00826	121,892,033,751,382	None
108	WATER_MAG_00003	M00913	Pantothenate biosynthesis, 2-oxoisovalerate/spermine => pantothenate	Pathway modules	Metabolism of cofactors and vitamins	Cofactor and vitamin metabolism	K00606 K00077 K13367 K00128 K01918	0.2	FALSE	K01918	2,033,712,189	None
109	WATER_MAG_00003	M00120	Coenzyme A biosynthesis, pantothenate => CoA	Pathway modules	Metabolism of cofactors and vitamins	Cofactor and vitamin metabolism	(K00867,K03525,K01947,K09680) ((K01922,K21977) K01598,K13038) (K02318,(K00954,K02201) K00859)	0.5	FALSE	K00859,K13038	1,614,035,901	None
110	WATER_MAG_00003	M00914	Coenzyme A biosynthesis, archaea, 2-oxoisovalerate => 4-phosphopantoate => CoA	Pathway modules	Metabolism of cofactors and vitamins	Cofactor and vitamin metabolism	K00606 K00077 K06982 K09722 K13038 K02201 K09735	0.142857143	FALSE	K13038	35901	None
111	WATER_MAG_00003	M00572	Pimeloyl-ACP biosynthesis, BioC-BioH pathway, malonyl-ACP => pimeloyl-ACP	Pathway modules	Metabolism of cofactors and vitamins	Cofactor and vitamin metabolism	K02169 (K00647,K09458) K00059 K02372 K00208 (K02170,K09789,K19560,K19561)	0.5	FALSE	K02372,K00059,K02169	1,249,619,826,303,760,000,000,000	None
112	WATER_MAG_00003	M00123	Biotin biosynthesis, pimeloyl-ACP/CoA => biotin	Pathway modules	Metabolism of cofactors and vitamins	Cofactor and vitamin metabolism	K00652 ((K00833,K19563) K01935,K19562) K01012	0.5	FALSE	K01012,K01935	3,674,847,905	None
113	WATER_MAG_00003	M00573	Biotin biosynthesis, BioI pathway, long-chain-acyl-ACP => pimeloyl-ACP => biotin	Pathway modules	Metabolism of cofactors and vitamins	Cofactor and vitamin metabolism	K16593 K00652 K19563 K01935 K01012	0.4	FALSE	K01012,K01935	3,674,847,905	None
114	WATER_MAG_00003	M00577	Biotin biosynthesis, BioW pathway, pimelate => pimeloyl-CoA => biotin	Pathway modules	Metabolism of cofactors and vitamins	Cofactor and vitamin metabolism	K01906 K00652 (K00833,K19563) K01935 K01012	0.4	FALSE	K01012,K01935	3,674,847,905	None
115	WATER_MAG_00003	M00881	Lipoic acid biosynthesis, plants and bacteria, octanoyl-ACP => dihydrolipoyl-E2/H	Pathway modules	Metabolism of cofactors and vitamins	Cofactor and vitamin metabolism	K03801 K03644	1	TRUE	K03644,K03801	166,973,870,159,075	None
116	WATER_MAG_00003	M00882	Lipoic acid biosynthesis, eukaryotes, octanoyl-ACP => dihydrolipoyl-H	Pathway modules	Metabolism of cofactors and vitamins	Cofactor and vitamin metabolism	K23735 K03644	0.5	FALSE	K03644	1,669,738,701	None
117	WATER_MAG_00003	M00883	Lipoic acid biosynthesis, animals and bacteria, octanoyl-ACP => dihydrolipoyl-H => dihydrolipoyl-E2	Pathway modules	Metabolism of cofactors and vitamins	Cofactor and vitamin metabolism	(K23735,K23734) K03644 (K10105,K16869)	0.333333333	FALSE	K03644	1,669,738,701	None
118	WATER_MAG_00003	M00884	Lipoic acid biosynthesis, octanoyl-CoA => dihydrolipoyl-E2	Pathway modules	Metabolism of cofactors and vitamins	Cofactor and vitamin metabolism	K23750 K03644	0.5	FALSE	K03644	1,669,738,701	None
119	WATER_MAG_00003	M00126	Tetrahydrofolate biosynthesis, GTP => THF	Pathway modules	Metabolism of cofactors and vitamins	Cofactor and vitamin metabolism	(K01495,K09007,K22391) (K01077,K01113,(K08310,K19965)) ((K13939,(K13940,K01633 K00950) K00796),(K01633 K13941)) (K11754,K20457) (K00287,K13998)	0.428571429	FALSE	K00796,K00950,K01495	2,746,914,791,584,800,000,000,000	None
120	WATER_MAG_00003	M00840	Tetrahydrofolate biosynthesis, mediated by ribA and trpF, GTP => THF	Pathway modules	Metabolism of cofactors and vitamins	Cofactor and vitamin metabolism	K14652 K22100 -- K01633 K13941 K22099 K00287	0.142857143	FALSE	K14652	3,269,663,610	'--' steps are assumed incomplete
121	WATER_MAG_00003	M00841	Tetrahydrofolate biosynthesis, mediated by PTPS, GTP => THF	Pathway modules	Metabolism of cofactors and vitamins	Cofactor and vitamin metabolism	K01495 K22101 K13941 K11754 K13998	0.2	FALSE	K01495	38482	None
122	WATER_MAG_00003	M00842	Tetrahydrobiopterin biosynthesis, GTP => BH4	Pathway modules	Metabolism of cofactors and vitamins	Cofactor and vitamin metabolism	K01495 K01737 K00072	0.666666667	FALSE	K01737,K01495	3,139,138,482	None
123	WATER_MAG_00003	M00843	L-threo-Tetrahydrobiopterin biosynthesis, GTP => L-threo-BH4	Pathway modules	Metabolism of cofactors and vitamins	Cofactor and vitamin metabolism	K01495 K01737 K17745	0.666666667	FALSE	K01737,K01495	3,139,138,482	None
124	WATER_MAG_00003	M00880	Molybdenum cofactor biosynthesis, GTP => molybdenum cofactor	Pathway modules	Metabolism of cofactors and vitamins	Cofactor and vitamin metabolism	((K03639 K03637),K20967) (K03635,K21142) (((K03831,K03638) K03750),K15376)	0.5	FALSE	K03639,K03637	5,858,663,305	None
125	WATER_MAG_00003	M00846	Siroheme biosynthesis, glutamyl-tRNA => siroheme	Pathway modules	Metabolism of cofactors and vitamins	Cofactor and vitamin metabolism	K02492 K01845 K01698 K01749 (K01719,K13542,K13543) (K02302,(K00589,K02303,K02496,K13542,K13543)+K02304-K03794)	0.75	TRUE	K01749,K02492,K01845,K01698,K02303	9,047,452,129,355,310,000,000,000,000	None
126	WATER_MAG_00003	M00868	Heme biosynthesis, animals and fungi, glycine => heme	Pathway modules	Metabolism of cofactors and vitamins	Cofactor and vitamin metabolism	K00643 K01698 K01749 K01719 K01599 K00228 K00231 K01772	0.75	TRUE	K01772,K01749,K01599,K01698,K00228,K00231	20,320,904,751,896,400,000,000,000,000	None
127	WATER_MAG_00003	M00121	Heme biosynthesis, plants and bacteria, glutamate => heme	Pathway modules	Metabolism of cofactors and vitamins	Cofactor and vitamin metabolism	K01885 K02492 K01845 K01698 K01749 (K01719,K13542,K13543) K01599 (K00228,K02495) (K00230,K00231,K08973) K01772	0.8	TRUE	K01772,K02495,K01749,K02492,K01845,K08973,K01599,K01698,K00228,K00231	2,032,021,476,904,740,000,000,000,000,000,000,000,000,000,000,000,000,000,000	None
128	WATER_MAG_00003	M00926	Heme biosynthesis, bacteria, glutamyl-tRNA => coproporphyrin III => heme	Pathway modules	Metabolism of cofactors and vitamins	Cofactor and vitamin metabolism	K02492 K01845 K01698 K01749 (K01719,K13542) K01599 K00231 K01772 K00435	0.777777778	TRUE	K01772,K01749,K02492,K01845,K01599,K01698,K00231	20,320,904,745,212,900,000,000,000,000,000,000,000	None
129	WATER_MAG_00003	M00924	Cobalamin biosynthesis, anaerobic, uroporphyrinogen III => sirohydrochlorin => cobyrinate a,c-diamide	Pathway modules	Metabolism of cofactors and vitamins	Cofactor and vitamin metabolism	(K02302,(K02303,K13542) K02304) (K02190,K03795,K22011) K03394 (K05934,K13541,K21479) K05936 (K02189,K13541) K02188 K05895 (K02191 K03399,K00595) K06042 K02224	0.916666667	TRUE	K05936,K03795,K06042,K02224,K02189,K13541,K02303,K03394,K02188,K05895,K00595	33,263,315,293,640,600,000,000,000,000,000,000,000,000,000,000,000,000	None
130	WATER_MAG_00003	M00925	Cobalamin biosynthesis, aerobic, uroporphyrinogen III => precorrin 2 => cobyrinate a,c-diamide	Pathway modules	Metabolism of cofactors and vitamins	Cofactor and vitamin metabolism	(K02303,K13542) (K03394,K13540) K02229 (K05934,K13540,K13541) K05936 K02228 K05895 K00595 K06042 K02224 K02230+K09882+K09883	0.727272727	FALSE	K05936,K06042,K02224,K13541,K02303,K03394,K05895,K00595	3,326,364,252,519,400,000,000,000,000,000,000,000,000	None
131	WATER_MAG_00003	M00122	Cobalamin biosynthesis, cobyrinate a,c-diamide => cobalamin	Pathway modules	Metabolism of cofactors and vitamins	Cofactor and vitamin metabolism	(K00798,K19221) K02232 (K02225,K02227) K02231 K00768 (K02226,K22316) K02233	0.571428571	FALSE	K02233,K19221,K02231,K02232	29,552,330,392,312,600,000,000,000,000,000,000,000,000,000	None
132	WATER_MAG_00003	M00117	Ubiquinone biosynthesis, prokaryotes, chorismate (+ polyprenyl-PP) => ubiquinol	Pathway modules	Metabolism of cofactors and vitamins	Cofactor and vitamin metabolism	(K03181,K18240) K03179 (K03182+K03186) K18800 K00568 K03185 K03183 K03184 K00568	0.277777778	FALSE	K03186,K03181,K03185	610,905,156,861,771	None
133	WATER_MAG_00003	M00116	Menaquinone biosynthesis, chorismate (+ polyprenyl-PP) => menaquinol	Pathway modules	Metabolism of cofactors and vitamins	Cofactor and vitamin metabolism	K02552 K02551 K08680 K02549 K01911 K01661 K19222 K02548 K03183	0.111111111	FALSE	K02549	62885	None
134	WATER_MAG_00003	M00932	Phylloquinone biosynthesis, chorismate (+ phytyl-PP) => phylloquinol	Pathway modules	Metabolism of cofactors and vitamins	Cofactor and vitamin metabolism	(K02552 K02551 K08680 K02549,K14759) (K01911,K14760) K01661 (K19222,K12073) K23094 K17872 K23095	0.3	FALSE	K17872,K23095,K02549	137,943,227,062,885	None
135	WATER_MAG_00003	M00112	Tocopherol/tocotorienol biosynthesis, homogentisate + phytyl/geranylgeranyl-PP => tocopherol/tocotorienol	Pathway modules	Metabolism of cofactors and vitamins	Cofactor and vitamin metabolism	K09833 (K12502,K18534) K09834 K05928	0.25	FALSE	K18534	6986	None
136	WATER_MAG_00003	M00096	C5 isoprenoid biosynthesis, non-mevalonate pathway	Pathway modules	Biosynthesis of terpenoids and polyketides	Terpenoid backbone biosynthesis	K01662 K00099 (K00991,K12506) K00919 (K01770,K12506) K03526 K03527 K01823	0.75	TRUE	K01662,K03527,K03526,K00099,K00919,K00991	271,122,511,785,187,000,000,000,000,000,000,000	None
137	WATER_MAG_00003	M00364	C10-C20 isoprenoid biosynthesis, bacteria	Pathway modules	Biosynthesis of terpenoids and polyketides	Terpenoid backbone biosynthesis	K01823 (K00795,K13789,K13787)	0.5	FALSE	K13789,K00795	52541	None
138	WATER_MAG_00003	M00366	C10-C20 isoprenoid biosynthesis, plants	Pathway modules	Biosynthesis of terpenoids and polyketides	Terpenoid backbone biosynthesis	K01823 K14066 K00787 K13789	0.25	FALSE	K13789	52541	None
139	WATER_MAG_00003	M00097	beta-Carotene biosynthesis, GGAP => beta-carotene	Pathway modules	Biosynthesis of terpenoids and polyketides	Plant terpenoid biosynthesis	K02291 K02293 K15744 K00514 K09835 K06443	0.833333333	TRUE	K02293,K09835,K06443,K00514,K15744	3,101,354,719,672,170,000,000,000,000,000,000,000	None
140	WATER_MAG_00003	M00793	dTDP-L-rhamnose biosynthesis	Pathway modules	Biosynthesis of terpenoids and polyketides	Polyketide sugar unit biosynthesis	K00973 K01710 (K01790 K00067,K23987)	0.25	FALSE	K00067	56287	None
141	WATER_MAG_00003	M00797	dTDP-D-desosamine biosynthesis	Pathway modules	Biosynthesis of terpenoids and polyketides	Polyketide sugar unit biosynthesis	K13308 K13309 (K13310,K16436) (K13311,K13326)	0.25	FALSE	K16436	51652	No KOfam profile for K13326
142	WATER_MAG_00003	M00800	dTDP-L-megosamine biosynthesis	Pathway modules	Biosynthesis of terpenoids and polyketides	Polyketide sugar unit biosynthesis	K16435 K16436 K13326 K16438 K13322	0.2	FALSE	K16436	51652	No KOfam profile for K13326,No KOfam profile for K13322
143	WATER_MAG_00003	M00803	dTDP-D-angolosamine biosynthesis	Pathway modules	Biosynthesis of terpenoids and polyketides	Polyketide sugar unit biosynthesis	K16435 K19859 K16436 K13332	0.25	FALSE	K16436	51652	No KOfam profile for K19859,No KOfam profile for K13332
144	WATER_MAG_00003	M00848	Aurachin biosynthesis, anthranilate => aurachin A	Pathway modules	Biosynthesis of other secondary metabolites	Biosynthesis of other antibiotics	K09460 K02078+K14245+K14246+K22798 K22799 K22800 K21272 K21271 K22801 K22802	0.03125	FALSE	K02078	47642	No KOfam profile for K09460,No KOfam profile for K14245,No KOfam profile for K14246,No KOfam profile for K22798,No KOfam profile for K22799,No KOfam profile for K22800,No KOfam profile for K21272,No KOfam profile for K21271,No KOfam profile for K22801,No KOfam profile for K22802
145	WATER_MAG_00003	M00835	Pyocyanine biosynthesis, chorismate => pyocyanine	Pathway modules	Biosynthesis of other secondary metabolites	Biosynthesis of other bacterial compounds	K13063 K20261 K06998 K20260 K20262 K21103 K20940	0.142857143	FALSE	K06998	7161	None
146	WATER_MAG_00003	M00627	beta-Lactam resistance, Bla system	Signature modules	Gene set	Drug resistance	K02172 K02171 (K18766,K17836)	0.333333333	FALSE	K17836	2,154,454,612	None
147	WATER_MAG_00003	M00651	Vancomycin resistance, D-Ala-D-Lac type	Signature modules	Gene set	Drug resistance	(K18345 K18344 K07260 K18346),(K18351 K18352 K18354 K18353) (K18347 K15739 K08641)	0.142857143	FALSE	K08641	39301	No KOfam profile for K18354
148	WATER_MAG_00003	M00718	Multidrug resistance, efflux pump MexAB-OprM	Signature modules	Gene set	Drug resistance	K18131 K03585+K18138+K18139	0.166666667	FALSE	K03585	46417	None
149	WATER_MAG_00003	M00611	Oxygenic photosynthesis in plants and cyanobacteria	Signature modules	Module set	Metabolic capacity	(M00161,M00163) M00165	0.734848485	FALSE	K00134,K02693,K02692,K01602,K00615,K01624,K02694,K02691,K00855,K00927,K02689,K02703	123,121,163,413,365,000,000,000,000,000,000,000,000,000,000,000,000,000,000,000,000	No KOfam profile for M00161,No KOfam profile for M00163,No KOfam profile for M00165
150	WATER_MAG_00003	M00612	Anoxygenic photosynthesis in purple bacteria	Signature modules	Module set	Metabolic capacity	M00597 M00165	0.318181818	FALSE	K00134,K01602,K00615,K01624,K00855,K00927	123,122,389,735,956,000,000,000,000,000,000	No KOfam profile for M00165,No KOfam profile for M00597
151	WATER_MAG_00003	M00613	Anoxygenic photosynthesis in green nonsulfur bacteria	Signature modules	Module set	Metabolic capacity	M00597 M00376	0.057692308	FALSE	K01679,K01962,K01963	614,453,848,047,614	No KOfam profile for M00597,No KOfam profile for M00376
152	WATER_MAG_00003	M00614	Anoxygenic photosynthesis in green sulfur bacteria	Signature modules	Module set	Metabolic capacity	M00598 M00173	0.136363636	FALSE	K01679,K01682,K01595	614,454,138,444,274	No KOfam profile for M00598,No KOfam profile for M00173
153	WATER_MAG_00003	M00617	Methanogen	Signature modules	Module set	Metabolic capacity	M00567,M00357,M00356,M00563	0.166666667	FALSE	K00925	5,995,142,962	None
154	WATER_MAG_00003	M00618	Acetogen	Signature modules	Module set	Metabolic capacity	M00377 M00579	0.25	FALSE	K00925	5,995,142,962	No KOfam profile for M00377,No KOfam profile for M00579
155	WATER_MAG_00003	M00615	Nitrate assimilation	Signature modules	Module set	Metabolic capacity	(K02575,K15576+K15577+K15578-K15579) M00531	0.75	TRUE	K02575,K00366	6,650,958,944,262	No KOfam profile for M00531
156	WATER_MAG_00003	M00616	Sulfate-sulfur assimilation	Signature modules	Module set	Metabolic capacity	(K02048,K23163)+K02046+K02047+K02045 M00176	0.416666667	FALSE	K00390,K00958,K00392	137,953,589,839,300	No KOfam profile for M00176
0	WATER_MAG_00004	M00001	Glycolysis (Embden-Meyerhof pathway), glucose => pyruvate	Pathway modules	Carbohydrate metabolism	Central carbohydrate metabolism	(K00844,K12407,K00845,K00886,K08074,K00918) (K01810,K06859,K13810,K15916) (K00850,K16370,K21071,K00918) (K01623,K01624,K11645,K16305,K16306) K01803 ((K00134,K00150) K00927,K11389) (K01834,K15633,K15634,K15635) K01689 (K00873,K12406)	0.7	FALSE	K00134,K00873,K00927,K01623,K01803,K15633,K00845	1,703,726,462,918,170,000,000,000,000,000,000,000,000,000,000,000,000	None
1	WATER_MAG_00004	M00002	Glycolysis, core module involving three-carbon compounds	Pathway modules	Carbohydrate metabolism	Central carbohydrate metabolism	K01803 ((K00134,K00150) K00927,K11389) (K01834,K15633,K15634,K15635) K01689 (K00873,K12406)	0.833333333	TRUE	K00134,K00873,K00927,K01803,K15633	1,703,726,462,918,170,000,000,000,000,000,000,000,000,000	None
2	WATER_MAG_00004	M00003	Gluconeogenesis, oxaloacetate => fructose-6P	Pathway modules	Carbohydrate metabolism	Central carbohydrate metabolism	(K01596,K01610) K01689 (K01834,K15633,K15634,K15635) K00927 (K00134,K00150) K01803 ((K01623,K01624,K11645) (K03841,K02446,K11532,K01086,K04041),K01622)	0.75	TRUE	K00134,K01610,K00927,K01623,K01803,K15633	17,037,195,611,043,800,000,000,000,000,000,000,000,000,000,000,000,000	None
3	WATER_MAG_00004	M00307	Pyruvate oxidation, pyruvate => acetyl-CoA	Pathway modules	Carbohydrate metabolism	Central carbohydrate metabolism	((K00163,K00161+K00162)+K00627+K00382-K13997),K00169+K00170+K00171+(K00172,K00189),K03737	0.75	TRUE	K00382,K00161,K00627	6,448,954,568,182,360,000	None
4	WATER_MAG_00004	M00009	Citrate cycle (TCA cycle, Krebs cycle)	Pathway modules	Carbohydrate metabolism	Central carbohydrate metabolism	(K01647,K05942) (K01681,K01682) (K00031,K00030) (K00164+K00658+K00382,K00174+K00175-K00177-K00176) (K01902+K01903,K01899+K01900,K18118) (K00234+K00235+K00236+K00237,K00239+K00240+K00241-(K00242,K18859,K18860),K00244+K00245+K00246-K00247) (K01676,K01679,K01677+K01678) (K00026,K00025,K00024,K00116)	0.708333333	FALSE	K00242,K00241,K01902,K01647,K00658,K00240,K00382,K00024,K01682,K00164,K01903	28,737,287,382,978,200,000,000,000,000,000,000,000,000,000,000,000,000,000,000	None
5	WATER_MAG_00004	M00010	Citrate cycle, first carbon oxidation, oxaloacetate => 2-oxoglutarate	Pathway modules	Carbohydrate metabolism	Central carbohydrate metabolism	(K01647,K05942) (K01681,K01682) (K00031,K00030)	0.666666667	FALSE	K01647,K01682	3,018,121,084	None
6	WATER_MAG_00004	M00011	Citrate cycle, second carbon oxidation, 2-oxoglutarate => oxaloacetate	Pathway modules	Carbohydrate metabolism	Central carbohydrate metabolism	(K00164+K00658+K00382,K00174+K00175-K00177-K00176) (K01902+K01903,K01899+K01900,K18118) (K00234+K00235+K00236+K00237,K00239+K00240+K00241-(K00242,K18859,K18860),K00244+K00245+K00246-K00247) (K01676,K01679,K01677+K01678) (K00026,K00025,K00024,K00116)	0.733333333	FALSE	K00242,K00241,K01902,K00658,K00240,K00382,K00024,K00164,K01903	2,873,728,738,297,820,000,000,000,000,000,000,000,000,000,000,000	None
7	WATER_MAG_00004	M00004	Pentose phosphate pathway (Pentose phosphate cycle)	Pathway modules	Carbohydrate metabolism	Central carbohydrate metabolism	(K13937,((K00036,K19243) (K01057,K07404))) K00033 K01783 (K01807,K01808) K00615 K00616 (K01810,K06859,K13810,K15916)	0.571428571	FALSE	K01807,K00616,K00615,K01783	2,742,331,270,307,730,000,000,000	None
8	WATER_MAG_00004	M00007	Pentose phosphate pathway, non-oxidative phase, fructose 6P => ribose 5P	Pathway modules	Carbohydrate metabolism	Central carbohydrate metabolism	K00615 (K00616,K13810) K01783 (K01807,K01808)	1	TRUE	K01807,K00616,K00615,K01783	2,742,331,270,307,730,000,000,000	None
9	WATER_MAG_00004	M00580	Pentose phosphate pathway, archaea, fructose 6P => ribose 5P	Pathway modules	Carbohydrate metabolism	Central carbohydrate metabolism	(K08094 (K08093,K13812),K13831) K01807	0.5	FALSE	K01807	27423	None
10	WATER_MAG_00004	M00005	PRPP biosynthesis, ribose 5P => PRPP	Pathway modules	Carbohydrate metabolism	Central carbohydrate metabolism	K00948	1	TRUE	K00948	54222	None
11	WATER_MAG_00004	M00308	Semi-phosphorylative Entner-Doudoroff pathway, gluconate => glycerate-3P	Pathway modules	Carbohydrate metabolism	Central carbohydrate metabolism	K05308 K00874 K01625 (K00134 K00927,K00131,K18978)	0.4	FALSE	K00134,K00927	170,377,532,590,372,000,000,000	None
12	WATER_MAG_00004	M00014	Glucuronate pathway (uronate pathway)	Pathway modules	Carbohydrate metabolism	Other carbohydrate metabolism	K00012 ((K12447 K16190),(K00699 (K01195,K14756))) K00002 K13247 -- K03331 (K05351,K00008) K00854	0.111111111	FALSE	K00012	61168	'--' steps are assumed incomplete
13	WATER_MAG_00004	M00632	Galactose degradation, Leloir pathway, galactose => alpha-D-glucose-1P	Pathway modules	Carbohydrate metabolism	Other carbohydrate metabolism	K01785 K00849 K00965 K01784	0.25	FALSE	K01784	16926	None
14	WATER_MAG_00004	M00552	D-galactonate degradation, De Ley-Doudoroff pathway, D-galactonate => glycerate-3P	Pathway modules	Carbohydrate metabolism	Other carbohydrate metabolism	K01684 K00883 K01631 K00134 K00927	0.4	FALSE	K00134,K00927	170,377,532,590,372,000,000,000	None
15	WATER_MAG_00004	M00129	Ascorbate biosynthesis, animals, glucose-1P => ascorbate	Pathway modules	Carbohydrate metabolism	Other carbohydrate metabolism	K00963 K00012 K00699 K01195 K00002 K01053 K00103	0.285714286	FALSE	K00963,K00012	3,186,761,168	None
16	WATER_MAG_00004	M00550	Ascorbate degradation, ascorbate => D-xylulose-5P	Pathway modules	Carbohydrate metabolism	Other carbohydrate metabolism	K02821+K02822+K03475 K03476 K03078 K03079 K03077	0.2	FALSE	K03476	63473	None
17	WATER_MAG_00004	M00854	Glycogen biosynthesis, glucose-1P => glycogen/starch	Pathway modules	Carbohydrate metabolism	Other carbohydrate metabolism	(K00963 (K00693+K00750,K16150,K16153,K13679,K20812)),(K00975 (K00703,K13679,K20812)) (K00700,K16149)	0.333333333	FALSE	K00963	31867	None
18	WATER_MAG_00004	M00549	Nucleotide sugar biosynthesis, glucose => UDP-glucose	Pathway modules	Carbohydrate metabolism	Other carbohydrate metabolism	(K00844,K00845,K12407,K00886) (K01835,K15779,K15778) (K00963,K12447)	0.666666667	FALSE	K00963,K00845	3,186,740,672	None
19	WATER_MAG_00004	M00892	UDP-N-acetyl-D-glucosamine biosynthesis, eukaryotes, glucose => UDP-GlcNAc	Pathway modules	Carbohydrate metabolism	Other carbohydrate metabolism	(K00844,K12407,K00845) K01810 K00820 K00621 K01836 K00972	0.333333333	FALSE	K00820,K00845	11,002,213,931,512,400,000	None
20	WATER_MAG_00004	M00909	UDP-N-acetyl-D-glucosamine biosynthesis, prokaryotes, glucose => UDP-GlcNAc	Pathway modules	Carbohydrate metabolism	Other carbohydrate metabolism	K00845 (K01810,K13810,K15916) K00820 K03431 K04042	0.6	FALSE	K00820,K04042,K00845	1,100,221,393,151,240,000,000,000	None
21	WATER_MAG_00004	M00012	Glyoxylate cycle	Pathway modules	Carbohydrate metabolism	Other carbohydrate metabolism	K01647 (K01681,K01682) K01637 (K01638,K19282) (K00026,K00025,K00024)	0.8	TRUE	K01647,K01638,K00024,K01682	30,181,589,503,988,200,000	None
22	WATER_MAG_00004	M00373	Ethylmalonyl pathway	Pathway modules	Carbohydrate metabolism	Other carbohydrate metabolism	K00626 K00023 K17865 K14446 K14447 K14448 K14449 K08691 K14451 K01965+K01966 K05606 K01847	0.541666667	FALSE	K00626,K05606,K14449,K17865,K00023,K08691,K01966	302,462,685,424,321,000,000,000,000,000,000,000,000,000,000,000,000,000,000,000,000,000,000,000,000	None
23	WATER_MAG_00004	M00740	Methylaspartate cycle	Pathway modules	Carbohydrate metabolism	Other carbohydrate metabolism	K01647 K01681 K00031 K00261 K19268+K01846 K04835 K19280 K14449 K19281 K19282 K00024	0.272727273	FALSE	K01647,K14449,K00024	301,812,432,139,882	None
24	WATER_MAG_00004	M00532	Photorespiration	Pathway modules	Carbohydrate metabolism	Other carbohydrate metabolism	(K01601-K01602) K19269 K11517 K03781 K14272 K00600 K00830 (K15893,K15919) K15918 K00281+K00605+K00382+K02437	0.2	FALSE	K00600,K00281,K02437,K00382,K00605	1,580,628,054,188,750,000,000,000,000,000,000,000,000,000,000,000	None
25	WATER_MAG_00004	M00013	Malonate semialdehyde pathway, propanoyl-CoA => acetyl-CoA	Pathway modules	Carbohydrate metabolism	Other carbohydrate metabolism	(K00248,K00232) (K07511,K14729) K05605 K23146 K00140	0.2	FALSE	K00140	60954	None
26	WATER_MAG_00004	M00741	Propanoyl-CoA metabolism, propanoyl-CoA => succinyl-CoA	Pathway modules	Carbohydrate metabolism	Other carbohydrate metabolism	(K01965+K01966,K11263+(K18472,K19312+K22568),K01964+K15036+K15037) K05606 (K01847,K01848+K01849)	0.666666667	FALSE	K05606,K01966,K01849	26,854,127,053,478,500,000	None
27	WATER_MAG_00004	M00165	Reductive pentose phosphate cycle (Calvin cycle)	Pathway modules	Energy metabolism	Carbon fixation	K00855 (K01601-K01602) K00927 (K05298,K00150,K00134) (K01623,K01624) (K03841,K02446,K11532,K01086) K00615 (K01623,K01624) (K01100,K11532,K01086) K00615 (K01807,K01808)	0.636363636	FALSE	K00134,K00927,K01807,K01623,K00615	1,703,775,322,742,370,000,000,000,000,000,000,000,000,000	No KOfam profile for M00165
28	WATER_MAG_00004	M00166	Reductive pentose phosphate cycle, ribulose-5P => glyceraldehyde-3P	Pathway modules	Energy metabolism	Carbon fixation	K00855 (K01601-K01602) K00927 (K05298,K00150,K00134)	0.5	FALSE	K00134,K00927	170,377,532,590,372,000,000,000	None
29	WATER_MAG_00004	M00167	Reductive pentose phosphate cycle, glyceraldehyde-3P => ribulose-5P	Pathway modules	Energy metabolism	Carbon fixation	(K01623,K01624) (K03841,K02446,K11532,K01086) K00615 (K01623,K01624) (K01100,K11532,K01086) K00615 (K01807,K01808)	0.714285714	FALSE	K01807,K01623,K00615	2,742,375,353,077,310,000	None
30	WATER_MAG_00004	M00168	CAM (Crassulacean acid metabolism), dark	Pathway modules	Energy metabolism	Carbon fixation	K01595 (K00025,K00026,K00024)	0.5	FALSE	K00024	39882	None
31	WATER_MAG_00004	M00169	CAM (Crassulacean acid metabolism), light	Pathway modules	Energy metabolism	Carbon fixation	K00029 K01006	1	TRUE	K00029,K01006	669,849,639	None
32	WATER_MAG_00004	M00172	C4-dicarboxylic acid cycle, NADP - malic enzyme type	Pathway modules	Energy metabolism	Carbon fixation	K01595 K00051 K00029 K01006	0.5	FALSE	K00029,K01006	669,849,639	None
33	WATER_MAG_00004	M00171	C4-dicarboxylic acid cycle, NAD - malic enzyme type	Pathway modules	Energy metabolism	Carbon fixation	K01595 K14454 K14455 (K00025,K00026) K00028 (K00814,K14272) K01006	0.142857143	FALSE	K01006	49639	None
34	WATER_MAG_00004	M00170	C4-dicarboxylic acid cycle, phosphoenolpyruvate carboxykinase type	Pathway modules	Energy metabolism	Carbon fixation	K01595 K14454 K14455 K01610	0.25	FALSE	K01610	195,611,043,856,264	None
35	WATER_MAG_00004	M00173	Reductive citrate cycle (Arnon-Buchanan cycle)	Pathway modules	Energy metabolism	Carbon fixation	(K00169+K00170+K00171+K00172,K03737) ((K01007,K01006) K01595,K01959+K01960,K01958) K00024 (K01676,K01679,K01677+K01678) (K00239+K00240-K00241-K00242,K00244+K00245-K00246-K00247,K18556+K18557+K18558+K18559+K18560) (K01902+K01903) (K00174+K00175-K00177-K00176) K00031 (K01681,K01682) (K15230+K15231,K15232+K15233 K15234)	0.458333333	FALSE	K00242,K00241,K01902,K00240,K01006,K00024,K15234,K01682,K01903	287,372,873,829,782,000,000,000,000,000,000,000,000,000,000	No KOfam profile for M00173
36	WATER_MAG_00004	M00376	3-Hydroxypropionate bi-cycle	Pathway modules	Energy metabolism	Carbon fixation	(K02160+K01961+K01962+K01963) K14468 K14469 K15052 K05606 (K01847,K01848+K01849) (K14471+K14472) (K00239+K00240+K00241) K01679 K08691 K14449 K14470 K09709	0.320512821	FALSE	K00241,K05606,K14449,K00240,K08691,K01849	287,382,685,424,321,000,000,000,000,000	No KOfam profile for M00376
37	WATER_MAG_00004	M00375	Hydroxypropionate-hydroxybutylate cycle	Pathway modules	Energy metabolism	Carbon fixation	(K01964+K15037+K15036) K15017 K15039 K15018 K15019 K15020 K05606 (K01848+K01849) (K15038,K15017) K14465 (K14466,K18861) K14534 K15016 K00626	0.178571429	FALSE	K00626,K05606,K01849	302,462,685,455,103,000,000,000,000,000,000,000,000,000,000	None
38	WATER_MAG_00004	M00374	Dicarboxylate-hydroxybutyrate cycle	Pathway modules	Energy metabolism	Carbon fixation	(K00169+K00170+K00171+K00172) K01007 K01595 K00024 (K01677+K01678) (K00239+K00240-K00241-K18860) (K01902+K01903) (K15038,K15017) K14465 (K14467,K18861) K14534 K15016 K00626	0.269230769	FALSE	K00241,K00626,K01902,K00240,K00024,K01903	287,383,024,629,782,000,000,000,000,000,000,000,000,000,000,000,000,000,000,000	None
39	WATER_MAG_00004	M00377	Reductive acetyl-CoA pathway (Wood-Ljungdahl pathway)	Pathway modules	Energy metabolism	Carbon fixation	K00198 K05299-K15022 K01938 K01491 K00297 K15023 K14138+K00197+K00194	0.428571429	FALSE	K01491,K01938,K00297	164,922,106,644,267	No KOfam profile for M00377
40	WATER_MAG_00004	M00620	Incomplete reductive citrate cycle, acetyl-CoA => oxoglutarate	Pathway modules	Energy metabolism	Carbon fixation	(K00169+K00170+K00171+K00172) (K01959+K01960) K00024 (K01677+K01678) (K18209+K18210) (K01902+K01903) (K00174+K00175+K00176+K00177)	0.285714286	FALSE	K01902,K00024,K01903	297,823,988,260,697	None
41	WATER_MAG_00004	M00357	Methanogenesis, acetate => methane	Pathway modules	Energy metabolism	Methane metabolism	((K00925 K00625),K01895) (K00193+K00197+K00194) (K00577+K00578+K00579+K00580+K00581-K00582-K00583+K00584) (K00399+K00401+K00402) (K22480+K22481+K22482,K03388+K03389+K03390,K08264+K08265,K03388+K03389+K03390+K14127+(K14126+K14128,K22516+K00125))	0.2	FALSE	K01895	51386	None
42	WATER_MAG_00004	M00346	Formaldehyde assimilation, serine pathway	Pathway modules	Energy metabolism	Methane metabolism	K00600 K00830 K00018 K11529 K01689 K01595 K00024 K08692+K14067 K08691	0.444444444	FALSE	K11529,K00600,K00024,K08691	21,423,158,062,805,400,000,000,000,000,000,000	None
43	WATER_MAG_00004	M00530	Dissimilatory nitrate reduction, nitrate => ammonia	Pathway modules	Energy metabolism	Nitrogen metabolism	(K00370+K00371+K00374,K02567+K02568) (K00362+K00363,K03385+K15876)	0.333333333	FALSE	K00371,K00370	4,073,720,636	None
44	WATER_MAG_00004	M00529	Denitrification, nitrate => nitrogen	Pathway modules	Energy metabolism	Nitrogen metabolism	(K00370+K00371+K00374,K02567+K02568) (K00368,K15864) (K04561+K02305) K00376	0.416666667	FALSE	K00376,K00371,K00370	24,821,407,371,711,900,000	None
45	WATER_MAG_00004	M00804	Complete nitrification, comammox, ammonia => nitrite => nitrate	Pathway modules	Energy metabolism	Nitrogen metabolism	K10944+K10945+K10946 K10535 K00370+K00371	0.333333333	FALSE	K00371,K00370	4,073,720,636	None
46	WATER_MAG_00004	M00176	Assimilatory sulfate reduction, sulfate => H2S	Pathway modules	Energy metabolism	Sulfur metabolism	(K13811,K00958+K00860,K00955+K00957,K00956+K00957+K00860) K00390 (K00380+K00381,K00392)	0.666666667	FALSE	K00958,K00390,K00381	502,204,125,724,761	No KOfam profile for M00176
47	WATER_MAG_00004	M00596	Dissimilatory sulfate reduction, sulfate => H2S	Pathway modules	Energy metabolism	Sulfur metabolism	K00958 (K00394+K00395) (K11180+K11181)	0.333333333	FALSE	K00958	50220	None
48	WATER_MAG_00004	M00144	NADH:quinone oxidoreductase, prokaryotes	Pathway modules	Energy metabolism	ATP synthesis	K00330+(K00331+K00332+K00333,K00331+K13378,K13380)+K00334+K00335+K00336+K00337+K00338+K00339+K00340+(K00341+K00342)+K00343	0.5	FALSE	K00340,K00337,K00334,K00338,K00343,K00335	68,166,126,851,440,600,000,000,000,000	None
49	WATER_MAG_00004	M00143	NADH dehydrogenase (ubiquinone) Fe-S protein/flavoprotein complex, mitochondria	Pathway modules	Energy metabolism	ATP synthesis	K03934+K03935+K03936+K03937+K03938+K03939+K03940+K03941+K03942+K03943-K03944	0.1	FALSE	K03939	20273	None
50	WATER_MAG_00004	M00146	NADH dehydrogenase (ubiquinone) 1 alpha subcomplex	Pathway modules	Energy metabolism	ATP synthesis	K03945+K03946+K03947+K03948+K03949+K03950+K03951+K03952+K03953+K03954+K03955+K03956+K11352+K11353	0.142857143	FALSE	K11352,K03953	855,957,463	None
51	WATER_MAG_00004	M00149	Succinate dehydrogenase, prokaryotes	Pathway modules	Energy metabolism	ATP synthesis	K00241+(K00242,K18859,K18860)+K00239+K00240	0.75	TRUE	K00242,K00241,K00240	287,372,873,863,103	None
52	WATER_MAG_00004	M00151	Cytochrome bc1 complex respiratory unit	Pathway modules	Energy metabolism	ATP synthesis	((K00412+K00413,K00410)+K00411),K03886+K03887+K03888,K03890+K03891+K03889	0.666666667	FALSE	K00412,K00411	5,664,756,648	None
53	WATER_MAG_00004	M00152	Cytochrome bc1 complex	Pathway modules	Energy metabolism	ATP synthesis	K00411+K00412+K00413+K00414+K00415+K00416+K00417+K00418+K00419+K00420	0.2	FALSE	K00412,K00411	5,664,756,648	None
54	WATER_MAG_00004	M00154	Cytochrome c oxidase	Pathway modules	Energy metabolism	ATP synthesis	(K02257+K02262+K02256+K02261+K02263+K02264+K02265+K02266+K02267+K02268+K02270-K02271+K02272-K02273+K02258+K02259+K02260)	0.133333333	FALSE	K02257,K02258	2,232,022,318	None
55	WATER_MAG_00004	M00155	Cytochrome c oxidase, prokaryotes	Pathway modules	Energy metabolism	ATP synthesis	K02275+(K02274+K02276,K15408)-K02277	0.5	FALSE	K02275	50603	None
56	WATER_MAG_00004	M00156	Cytochrome c oxidase, cbb3-type	Pathway modules	Energy metabolism	ATP synthesis	((K00404+K00405,K15862)+K00407+K00406)	1	TRUE	K00407,K00406,K00404,K00405	24,539,245,402,453,700,000	None
57	WATER_MAG_00004	M00157	F-type ATPase, prokaryotes and chloroplasts	Pathway modules	Energy metabolism	ATP synthesis	K02111+K02112+K02113+K02114+K02115+K02108+K02109+K02110	1	TRUE	K02109,K02111,K02113,K02108,K02112,K02114,K02115,K02110	5,676,567,523,209,230,000,000,000,000,000,000,000,000,000	None
58	WATER_MAG_00004	M00082	Fatty acid biosynthesis, initiation	Pathway modules	Lipid metabolism	Fatty acid metabolism	(K11262,(K02160+K01961,K11263)+(K01962+K01963,K18472)) (K00665,K00667+K00668,K11533,(K00645 (K00648,K18473)))	0.666666667	FALSE	K00645,K00648	1,433,831,051	None
59	WATER_MAG_00004	M00083	Fatty acid biosynthesis, elongation	Pathway modules	Lipid metabolism	Fatty acid metabolism	K00665,(K00667 K00668),K11533,((K00647,K09458) K00059 (K02372,K01716,K16363) (K00208,K02371,K10780,K00209))	0.75	TRUE	K00208,K01716,K00059	1,170,210,809,845,330,000,000	None
60	WATER_MAG_00004	M00873	Fatty acid biosynthesis in mitochondria, animals	Pathway modules	Lipid metabolism	Fatty acid metabolism	K18660 K03955+K00645 K09458 K11539+K13370 K22540 K07512	0.083333333	FALSE	K00645	14338	None
61	WATER_MAG_00004	M00874	Fatty acid biosynthesis in mitochondria, fungi	Pathway modules	Lipid metabolism	Fatty acid metabolism	K11262 K03955+K00645 K09458 K00059 K22541 K07512	0.25	FALSE	K00645,K00059	14,338,339,396,726	None
62	WATER_MAG_00004	M00086	beta-Oxidation, acyl-CoA synthesis	Pathway modules	Lipid metabolism	Fatty acid metabolism	K01897,K15013	1	TRUE	K01897	33030	None
63	WATER_MAG_00004	M00087	beta-Oxidation	Pathway modules	Lipid metabolism	Fatty acid metabolism	(K00232,K00249,K00255,K06445,K09479) (((K01692,K07511,K13767) (K00022,K07516)),K01825,K01782,K07514,K07515,K10527) (K00632,K07508,K07509,K07513)	0.5	FALSE	K00249,K01692	298,346,812,671,152,000	None
64	WATER_MAG_00004	M00104	Bile acid biosynthesis, cholesterol => cholate/chenodeoxycholate	Pathway modules	Lipid metabolism	Sterol biosynthesis	K00489 K12408 K07431 K00251 K00037 K00488 K08748 K01796 K10214 K12405 K08764 K11992	0.083333333	FALSE	K01796	2982	None
65	WATER_MAG_00004	M00088	Ketone body biosynthesis, acetyl-CoA => acetoacetate/3-hydroxybutyrate/acetone	Pathway modules	Lipid metabolism	Lipid metabolism	K00626 K01641 K01640 K00019 K01574	0.4	FALSE	K00626,K00019	3,024,655,103,515,850,000,000,000,000,000,000,000,000	None
66	WATER_MAG_00004	M00098	Acylglycerol degradation	Pathway modules	Lipid metabolism	Lipid metabolism	(K01046,K12298,K16816,K13534,K14073,K14074,K14075,K14076,K22283,K14452,K22284,K14674,K14675,K17900) K01054	0.5	FALSE	K01046	24533	None
67	WATER_MAG_00004	M00093	Phosphatidylethanolamine (PE) biosynthesis, PA => PS => PE	Pathway modules	Lipid metabolism	Lipid metabolism	K00981 (K00998,K17103) K01613	0.666666667	FALSE	K00981,K17103	2,947,517,038	None
68	WATER_MAG_00004	M00048	Inosine monophosphate biosynthesis, PRPP + glutamine => IMP	Pathway modules	Nucleotide metabolism	Purine metabolism	K00764 (K01945,K11787,K11788,K13713) (K00601,K11175,K08289,K11787,K01492) (K01952,(K23269+K23264+K23265),(K23270+K23265)) (K01933,K11787,K11788 (K01587,K11808,K01589 K01588)) (K01923,K01587,K13713) K01756 (K00602,(K01492,K06863 K11176))	0.666666667	FALSE	K23265,K01588,K23264,K01945,K00764,K01589,K00602,K01756	189,981,557,918,999,000,000,000,000,000,000,000,000	None
69	WATER_MAG_00004	M00049	Adenine ribonucleotide biosynthesis, IMP => ADP,ATP	Pathway modules	Nucleotide metabolism	Purine metabolism	K01939 K01756 (K00939,K18532,K18533,K00944) (K00940,K00873,K12406)	1	TRUE	K00873,K00939,K01756,K01939	26,462,918,151,385,300,000,000,000,000	None
70	WATER_MAG_00004	M00050	Guanine ribonucleotide biosynthesis IMP => GDP,GTP	Pathway modules	Nucleotide metabolism	Purine metabolism	K00088 K01951 K00942 (K00940,K18533,K00873,K12406)	0.5	FALSE	K00873,K01951	264,629,181,989,261,000	None
71	WATER_MAG_00004	M00546	Purine degradation, xanthine => urea	Pathway modules	Nucleotide metabolism	Purine metabolism	(K00106,K00087+K13479+K13480,K13481+K13482,K11177+K11178+K13483) (K00365,K16838,K16839,K22879) (K13484,K07127 (K13485,K16838,K16840)) (K01466,K16842) K01477	0.5	FALSE	K16842,K07127,K13485	2,791,927,920,487,940,000,000,000	None
72	WATER_MAG_00004	M00051	Uridine monophosphate biosynthesis, glutamine (+ PRPP) => UMP	Pathway modules	Nucleotide metabolism	Pyrimidine metabolism	(K11540,(K11541 K01465),((K01954,K01955+K01956) (K00609+K00610,K00608) K01465)) (K00226,K00254,K17828) (K13421,K00762 K01591)	0.4	FALSE	K00762,K01465	201,624,059,320,163	None
73	WATER_MAG_00004	M00052	Pyrimidine ribonucleotide biosynthesis, UMP => UDP/UTP,CDP/CTP	Pathway modules	Nucleotide metabolism	Pyrimidine metabolism	(K13800,K13809,K09903) (K00940,K18533) K01937	0.333333333	FALSE	K01937	10640	None
74	WATER_MAG_00004	M00053	Pyrimidine deoxyribonuleotide biosynthesis, CDP/CTP => dCDP/dCTP,dTDP/dTTP	Pathway modules	Nucleotide metabolism	Pyrimidine metabolism	(K00524,K00525+K00526,K10807+K10808) (K00940,K18533) (K00527,K21636) K01494 K01520 (K00560,K13998) K00943 K00940	0.3125	FALSE	K00943,K01494,K00525	468,255,165,821,320	None
75	WATER_MAG_00004	M00046	Pyrimidine degradation, uracil => beta-alanine, thymine => 3-aminoisobutanoate	Pathway modules	Nucleotide metabolism	Pyrimidine metabolism	(K00207,K17722+K17723) K01464 (K01431,K06016)	0.833333333	TRUE	K17722,K06016,K01464	2,242,442,633,170,240,000	None
76	WATER_MAG_00004	M00020	Serine biosynthesis, glycerate-3P => serine	Pathway modules	Amino acid metabolism	Serine and threonine metabolism	K00058 K00831 (K01079,K02203,K22305)	0.666666667	FALSE	K00831,K01079	522,464,919	None
77	WATER_MAG_00004	M00018	Threonine biosynthesis, aspartate => homoserine => threonine	Pathway modules	Amino acid metabolism	Serine and threonine metabolism	(K00928,K12524,K12525,K12526) K00133 (K00003,K12524,K12525) (K00872,K02204,K02203) K01733	0.4	FALSE	K00133,K00003	27,179,113,042,884	None
78	WATER_MAG_00004	M00555	Betaine biosynthesis, choline => betaine	Pathway modules	Amino acid metabolism	Serine and threonine metabolism	(K17755,((K00108,K11440,K00499) (K00130,K14085)))	0.5	FALSE	K00108	29622	None
79	WATER_MAG_00004	M00033	Ectoine biosynthesis, aspartate => ectoine	Pathway modules	Amino acid metabolism	Serine and threonine metabolism	K00928 K00133 K00836 K06718 K06720	0.2	FALSE	K00133	2,717,942,884	None
80	WATER_MAG_00004	M00919	Ectoine degradation, ectoine => aspartate	Pathway modules	Amino acid metabolism	Serine and threonine metabolism	K15783 K15784 K15785 K15786	0.25	FALSE	K15783	20711	None
81	WATER_MAG_00004	M00021	Cysteine biosynthesis, serine => cysteine	Pathway modules	Amino acid metabolism	Cysteine and methionine metabolism	(K00640,K23304) (K01738,K13034,K17069)	0.5	FALSE	K01738	10354	None
82	WATER_MAG_00004	M00609	Cysteine biosynthesis, methionine => cysteine	Pathway modules	Amino acid metabolism	Cysteine and methionine metabolism	K00789 K17462 K01243 K07173 K17216 K17217	0.166666667	FALSE	K00789	167,162,541	None
83	WATER_MAG_00004	M00017	Methionine biosynthesis, apartate => homoserine => methionine	Pathway modules	Amino acid metabolism	Cysteine and methionine metabolism	(K00928,K12524,K12525) K00133 (K00003,K12524,K12525) (K00651,K00641) K01739 (K01760,K14155) (K00548,K24042,K00549)	0.571428571	FALSE	K14155,K00133,K00003,K00548	177,032,717,911,304,000,000,000	None
84	WATER_MAG_00004	M00034	Methionine salvage pathway	Pathway modules	Amino acid metabolism	Cysteine and methionine metabolism	K00789 K01611 K00797 ((K01243,K01244) K00899,K00772) K08963 (K16054,K08964 (K09880,K08965 K08966)) K08967 (K00815,K08969,K23977,K00832,K00838)	0.375	FALSE	K00789,K01611,K00797	1,671,625,416,301,260,000	None
85	WATER_MAG_00004	M00035	Methionine degradation	Pathway modules	Amino acid metabolism	Cysteine and methionine metabolism	K00789 (K00558,K17398,K17399) K01251 (K01697,K10150)	0.5	FALSE	K00789,K01251	16,716,254,136,598	None
86	WATER_MAG_00004	M00368	Ethylene biosynthesis, methionine => ethylene	Pathway modules	Amino acid metabolism	Cysteine and methionine metabolism	K00789 (K01762,K20772) K05933	0.333333333	FALSE	K00789	167,162,541	None
87	WATER_MAG_00004	M00019	Valine/isoleucine biosynthesis, pyruvate => valine / 2-oxobutanoate => isoleucine	Pathway modules	Amino acid metabolism	Branched-chain amino acid metabolism	K01652+(K01653,K11258) K00053 K01687 K00826	0.875	TRUE	K01653,K00826,K00053,K01687	17,648,102,194,961,800,000	None
88	WATER_MAG_00004	M00535	Isoleucine biosynthesis, pyruvate => 2-oxobutanoate	Pathway modules	Amino acid metabolism	Branched-chain amino acid metabolism	K09011 K01703+K01704 K00052	0.5	FALSE	K00052,K01704	3,761,437,611	None
89	WATER_MAG_00004	M00570	Isoleucine biosynthesis, threonine => 2-oxobutanoate => isoleucine	Pathway modules	Amino acid metabolism	Branched-chain amino acid metabolism	(K17989,K01754) K01652+(K01653,K11258) K00053 K01687 K00826	0.9	TRUE	K01653,K00826,K00053,K01754,K01687	1,764,810,219,496,180,000,000,000,000,000,000	None
90	WATER_MAG_00004	M00432	Leucine biosynthesis, 2-oxoisovalerate => 2-oxoisocaproate	Pathway modules	Amino acid metabolism	Branched-chain amino acid metabolism	K01649 (K01702,K01703+K01704) K00052	0.5	FALSE	K00052,K01704	3,761,437,611	None
91	WATER_MAG_00004	M00036	Leucine degradation, leucine => acetoacetate + acetyl-CoA	Pathway modules	Amino acid metabolism	Branched-chain amino acid metabolism	K00826 ((K00166+K00167,K11381)+K09699+K00382) (K00253,K00249) (K01968+K01969) (K05607,K13766) K01640	0.472222222	FALSE	K01969,K00826,K00249,K00382	3,520,102,192,983,640,000,000,000,000,000	None
92	WATER_MAG_00004	M00016	Lysine biosynthesis, succinyl-DAP pathway, aspartate => lysine	Pathway modules	Amino acid metabolism	Lysine metabolism	(K00928,K12524,K12525,K12526) K00133 K01714 K00215 K00674 (K00821,K14267) K01439 K01778 (K01586,K12526)	0.666666667	FALSE	K00133,K00215,K01439,K01778,K14267,K01714	2,717,923,507,417,600,000,000,000,000,000,000,000,000	None
93	WATER_MAG_00004	M00525	Lysine biosynthesis, acetyl-DAP pathway, aspartate => lysine	Pathway modules	Amino acid metabolism	Lysine metabolism	K00928 K00133 K01714 K00215 K05822 K00841 K05823 K01778 K01586	0.444444444	FALSE	K00133,K00215,K01778,K01714	271,792,350,742,884,000,000,000,000,000	None
94	WATER_MAG_00004	M00526	Lysine biosynthesis, DAP dehydrogenase pathway, aspartate => lysine	Pathway modules	Amino acid metabolism	Lysine metabolism	(K00928,K12524,K12525,K12526) K00133 K01714 K00215 K03340 (K01586,K12526)	0.5	FALSE	K00133,K00215,K01714	27,179,235,074,288,400,000	None
95	WATER_MAG_00004	M00527	Lysine biosynthesis, DAP aminotransferase pathway, aspartate => lysine	Pathway modules	Amino acid metabolism	Lysine metabolism	(K00928,K12524,K12525,K12526) K00133 K01714 K00215 K10206 K01778 (K01586,K12526)	0.571428571	FALSE	K00133,K00215,K01778,K01714	271,792,350,742,884,000,000,000,000,000	None
96	WATER_MAG_00004	M00030	Lysine biosynthesis, AAA pathway, 2-oxoglutarate => 2-aminoadipate => lysine	Pathway modules	Amino acid metabolism	Lysine metabolism	K01655 K17450 K01705 K05824 K00838 K00143 (K00293,K24034) K00290	0.125	FALSE	K00290	3,373,756,121	None
97	WATER_MAG_00004	M00032	Lysine degradation, lysine => saccharopine => acetoacetyl-CoA	Pathway modules	Amino acid metabolism	Lysine metabolism	K14157 K14085 K00825 (K15791+K00658+K00382) K00252 (K07514,(K07515,K07511) K00022)	0.277777778	FALSE	K00658,K00382,K00252	2,037,164,489,182,330,000	None
98	WATER_MAG_00004	M00028	Ornithine biosynthesis, glutamate => ornithine	Pathway modules	Amino acid metabolism	Arginine and proline metabolism	(K00618,K00619,K14681,K14682,K00620,K22477,K22478) ((K00930,K22478) K00145,K12659) (K00818,K00821) (K01438,K14677,K00620)	0.6	FALSE	K01438,K00145,K00930	479,566,191,959,121	None
99	WATER_MAG_00004	M00844	Arginine biosynthesis, ornithine => arginine	Pathway modules	Amino acid metabolism	Arginine and proline metabolism	K00611 K01940 (K01755,K14681)	0.666666667	FALSE	K01940,K00611	4,199,859,304	None
100	WATER_MAG_00004	M00845	Arginine biosynthesis, glutamate => acetylcitrulline => arginine	Pathway modules	Amino acid metabolism	Arginine and proline metabolism	K22478 K00145 K00821 K09065 K01438 K01940 K01755	0.428571429	FALSE	K01940,K01438,K00145	419,984,795,661,919	None
101	WATER_MAG_00004	M00029	Urea cycle	Pathway modules	Amino acid metabolism	Arginine and proline metabolism	K01948 K00611 K01940 (K01755,K14681) K01476	0.6	FALSE	K01940,K01476,K00611	419,985,363,959,304	None
102	WATER_MAG_00004	M00015	Proline biosynthesis, glutamate => proline	Pathway modules	Amino acid metabolism	Arginine and proline metabolism	((K00931 K00147),K12657) K00286	0.5	FALSE	K00286	1,986,322,595	None
103	WATER_MAG_00004	M00133	Polyamine biosynthesis, arginine => agmatine => putrescine => spermidine	Pathway modules	Amino acid metabolism	Polyamine biosynthesis	(K01583,K01584,K01585,K02626) K01480 K01611 K00797	1	TRUE	K01480,K01611,K00797,K01583	230,346,301,263,013,000,000,000,000,000	None
104	WATER_MAG_00004	M00134	Polyamine biosynthesis, arginine => ornithine => putrescine	Pathway modules	Amino acid metabolism	Polyamine biosynthesis	K01476 K01581	1	TRUE	K01476,K01581	5,363,935,051	None
105	WATER_MAG_00004	M00136	GABA biosynthesis, prokaryotes, putrescine => GABA	Pathway modules	Amino acid metabolism	Polyamine biosynthesis	K09470 K09471 K09472 K09473	0.25	FALSE	K09471	100,453,262,652,041	None
106	WATER_MAG_00004	M00026	Histidine biosynthesis, PRPP => histidine	Pathway modules	Amino acid metabolism	Histidine metabolism	(K00765-K02502) (K01523 K01496,K11755,K14152) (K01814,K24017) (K02501+K02500,K01663) ((K01693 K00817 (K04486,K05602,K18649)),(K01089 K00817)) (K00013,K14152)	0.357142857	FALSE	K00817,K01814,K02500	476,605,567,655,677	None
107	WATER_MAG_00004	M00045	Histidine degradation, histidine => N-formiminoglutamate => glutamate	Pathway modules	Amino acid metabolism	Histidine metabolism	K01745 K01712 K01468 (K01479,K00603,K13990,(K05603 K01458))	0.2	FALSE	K01458	16,264,918,016,265	None
108	WATER_MAG_00004	M00022	Shikimate pathway, phosphoenolpyruvate + erythrose-4P => chorismate	Pathway modules	Amino acid metabolism	Aromatic amino acid metabolism	(K01626,K03856,K13853) (((K01735,K13829) ((K03785,K03786) K00014,K13832)),K13830) ((K00891,K13829) (K00800,K24018),K13830) K01736	0.571428571	FALSE	K00800,K00014,K01736,K03786	50,531,495,554,336,400,000,000	None
109	WATER_MAG_00004	M00023	Tryptophan biosynthesis, chorismate => tryptophan	Pathway modules	Amino acid metabolism	Aromatic amino acid metabolism	(((K01657+K01658,K13503,K13501,K01656) K00766),K13497) (((K01817,K24017) (K01656,K01609)),K13498,K13501) (K01695+(K01696,K06001),K01694)	0.375	FALSE	K01696,K01817	3,605,536,054	None
110	WATER_MAG_00004	M00024	Phenylalanine biosynthesis, chorismate => phenylpyruvate => phenylalanine	Pathway modules	Amino acid metabolism	Aromatic amino acid metabolism	((K01850,K04092,K14187,K04093,K04516,K06208,K06209) (K01713,K04518,K05359),K14170) (K00832,K00838)	0.333333333	FALSE	K01713,K04518	6,392,637,104	None
111	WATER_MAG_00004	M00044	Tyrosine degradation, tyrosine => homogentisate	Pathway modules	Amino acid metabolism	Aromatic amino acid metabolism	(K00815,K00838,K00832,K03334) K00457 K00451 K01800 (K01555,K16171)	0.6	FALSE	K00451,K01800,K01555	217,422,174,063,256,000,000,000,000,000	None
112	WATER_MAG_00004	M00533	Homoprotocatechuate degradation, homoprotocatechuate => 2-oxohept-3-enedioate	Pathway modules	Amino acid metabolism	Aromatic amino acid metabolism	K00455 K00151 K01826 K05921	0.25	FALSE	K01826	917,935,542	None
113	WATER_MAG_00004	M00027	GABA (gamma-Aminobutyrate) shunt	Pathway modules	Amino acid metabolism	Other amino acid metabolism	K01580 (K13524,K07250,K00823,K16871) (K00135,K00139,K17761)	0.333333333	FALSE	K07250	48297	None
114	WATER_MAG_00004	M00118	Glutathione biosynthesis, glutamate => glutathione	Pathway modules	Amino acid metabolism	Other amino acid metabolism	(K11204+K11205,K01919) (K21456,K01920)	1	TRUE	K01920,K01919	2,153,551,997	None
115	WATER_MAG_00004	M00060	KDO2-lipid A biosynthesis, Raetz pathway, LpxL-LpxM type	Pathway modules	Glycan metabolism	Lipopolysaccharide metabolism	K00677 K02535 K02536 (K03269,K09949) K00748 K00912 K02527 K02517 K02560	0.666666667	FALSE	K02527,K00677,K02535,K02536,K09949,K00748	62,112,492,440,332,500,000,000,000,000	None
116	WATER_MAG_00004	M00866	KDO2-lipid A biosynthesis, Raetz pathway, non-LpxL-LpxM type	Pathway modules	Glycan metabolism	Lipopolysaccharide metabolism	K00677 (K02535,K16363) K02536 (K03269,K09949) K00748 K00912 K02527 K02517 K09778	0.666666667	FALSE	K02527,K00677,K02535,K02536,K09949,K00748	62,112,492,440,332,500,000,000,000,000	None
117	WATER_MAG_00004	M00063	CMP-KDO biosynthesis	Pathway modules	Glycan metabolism	Lipopolysaccharide metabolism	K06041 K01627 K03270 K00979	0.5	FALSE	K00979,K01627	3,186,646,413	None
118	WATER_MAG_00004	M00127	Thiamine biosynthesis, prokaryotes, AIR (+ DXP/tyrosine) => TMP/TPP	Pathway modules	Metabolism of cofactors and vitamins	Cofactor and vitamin metabolism	K03148+K03154 K03151 K03150 K03149 K03147 ((K00941 K00788),K14153,K21219) K00946	0.214285714	FALSE	K03149,K03154	3,668,336,682	None
119	WATER_MAG_00004	M00895	Thiamine biosynthesis, prokaryotes, AIR (+ DXP/glycine) => TMP/TPP	Pathway modules	Metabolism of cofactors and vitamins	Cofactor and vitamin metabolism	K03148+K03154 K03151 K03153 K03149 K10810 K03147 K00941 K00788 K00946	0.277777778	FALSE	K03149,K03153,K03154	366,833,668,136,682	None
120	WATER_MAG_00004	M00897	Thiamine biosynthesis, plants, AIR (+ NAD+) => TMP/thiamine/TPP	Pathway modules	Metabolism of cofactors and vitamins	Cofactor and vitamin metabolism	K03146 K03147 K14153 K22911 K00949	0.2	FALSE	K00949	1995	None
121	WATER_MAG_00004	M00898	Thiamine biosynthesis, pyridoxal-5P => TMP/thiamine/TPP	Pathway modules	Metabolism of cofactors and vitamins	Cofactor and vitamin metabolism	K03146 K18278 K00877 K14154 -- K00949	0.166666667	FALSE	K00949	1995	'--' steps are assumed incomplete
122	WATER_MAG_00004	M00125	Riboflavin biosynthesis, plants and bacteria, GTP => riboflavin/FMN/FAD	Pathway modules	Metabolism of cofactors and vitamins	Cofactor and vitamin metabolism	(K01497,K14652) (K01498 K00082,K11752) (K22912,K20860,K20861,K20862,K21063,K21064) (K02858,K14652) K00794 K00793 (K20884 K22949,K11753)	0.714285714	FALSE	K14652,K11752,K11753,K01497,K00793	77,251,448,220,635,400,000,000	None
123	WATER_MAG_00004	M00911	Riboflavin biosynthesis, fungi, GTP => riboflavin/FMN/FAD	Pathway modules	Metabolism of cofactors and vitamins	Cofactor and vitamin metabolism	K01497 K14654 K14655 -- K02858 K00794 K00793 K00861 K00953	0.222222222	FALSE	K01497,K00793	432,267,723	'--' steps are assumed incomplete
124	WATER_MAG_00004	M00124	Pyridoxal-P biosynthesis, erythrose-4P => pyridoxal-P	Pathway modules	Metabolism of cofactors and vitamins	Cofactor and vitamin metabolism	K03472 K03473 K00831 K00097 K03474 K00275	0.666666667	FALSE	K00097,K00831,K00275,K03474	2,901,552,241,170,140,000	None
125	WATER_MAG_00004	M00115	NAD biosynthesis, aspartate => quinolinate => NAD	Pathway modules	Metabolism of cofactors and vitamins	Cofactor and vitamin metabolism	(K00278,K06989) K03517 K00767 (K00969,K06210) (K01916,K01950)	0.6	FALSE	K03517,K00278,K01916	362,725,021,352,786	None
126	WATER_MAG_00004	M00912	NAD biosynthesis, tryptophan => quinolinate => NAD	Pathway modules	Metabolism of cofactors and vitamins	Cofactor and vitamin metabolism	(K00453,K00463) (K01432,K14263,K07130) K00486 K01556 K00452 K00767 (K00969,K06210) (K01916,K01950)	0.125	FALSE	K01916	52786	None
127	WATER_MAG_00004	M00119	Pantothenate biosynthesis, valine/L-aspartate => pantothenate	Pathway modules	Metabolism of cofactors and vitamins	Cofactor and vitamin metabolism	K00826 K00606 K00077 K01579 (K01918,K13799)	0.6	FALSE	K01918,K00826,K00077	25,841,021,958,014	None
128	WATER_MAG_00004	M00913	Pantothenate biosynthesis, 2-oxoisovalerate/spermine => pantothenate	Pathway modules	Metabolism of cofactors and vitamins	Cofactor and vitamin metabolism	K00606 K00077 K13367 K00128 K01918	0.4	FALSE	K01918,K00077	258,458,014	None
129	WATER_MAG_00004	M00120	Coenzyme A biosynthesis, pantothenate => CoA	Pathway modules	Metabolism of cofactors and vitamins	Cofactor and vitamin metabolism	(K00867,K03525,K01947,K09680) ((K01922,K21977) K01598,K13038) (K02318,(K00954,K02201) K00859)	0.5	FALSE	K00954,K00859	2,532,664,221	None
130	WATER_MAG_00004	M00914	Coenzyme A biosynthesis, archaea, 2-oxoisovalerate => 4-phosphopantoate => CoA	Pathway modules	Metabolism of cofactors and vitamins	Cofactor and vitamin metabolism	K00606 K00077 K06982 K09722 K13038 K02201 K09735	0.142857143	FALSE	K00077	58014	None
131	WATER_MAG_00004	M00572	Pimeloyl-ACP biosynthesis, BioC-BioH pathway, malonyl-ACP => pimeloyl-ACP	Pathway modules	Metabolism of cofactors and vitamins	Cofactor and vitamin metabolism	K02169 (K00647,K09458) K00059 K02372 K00208 (K02170,K09789,K19560,K19561)	0.333333333	FALSE	K00208,K00059	117,021,080,339,396,000	None
132	WATER_MAG_00004	M00881	Lipoic acid biosynthesis, plants and bacteria, octanoyl-ACP => dihydrolipoyl-E2/H	Pathway modules	Metabolism of cofactors and vitamins	Cofactor and vitamin metabolism	K03801 K03644	1	TRUE	K03644,K03801	18,245,698,558,222	None
133	WATER_MAG_00004	M00882	Lipoic acid biosynthesis, eukaryotes, octanoyl-ACP => dihydrolipoyl-H	Pathway modules	Metabolism of cofactors and vitamins	Cofactor and vitamin metabolism	K23735 K03644	0.5	FALSE	K03644	182,456,985	None
134	WATER_MAG_00004	M00883	Lipoic acid biosynthesis, animals and bacteria, octanoyl-ACP => dihydrolipoyl-H => dihydrolipoyl-E2	Pathway modules	Metabolism of cofactors and vitamins	Cofactor and vitamin metabolism	(K23735,K23734) K03644 (K10105,K16869)	0.333333333	FALSE	K03644	182,456,985	None
135	WATER_MAG_00004	M00884	Lipoic acid biosynthesis, octanoyl-CoA => dihydrolipoyl-E2	Pathway modules	Metabolism of cofactors and vitamins	Cofactor and vitamin metabolism	K23750 K03644	0.5	FALSE	K03644	182,456,985	None
136	WATER_MAG_00004	M00126	Tetrahydrofolate biosynthesis, GTP => THF	Pathway modules	Metabolism of cofactors and vitamins	Cofactor and vitamin metabolism	(K01495,K09007,K22391) (K01077,K01113,(K08310,K19965)) ((K13939,(K13940,K01633 K00950) K00796),(K01633 K13941)) (K11754,K20457) (K00287,K13998)	0.571428571	FALSE	K00796,K00950,K00287,K11754	47,541,676,154,062,000	None
137	WATER_MAG_00004	M00840	Tetrahydrofolate biosynthesis, mediated by ribA and trpF, GTP => THF	Pathway modules	Metabolism of cofactors and vitamins	Cofactor and vitamin metabolism	K14652 K22100 -- K01633 K13941 K22099 K00287	0.285714286	FALSE	K14652,K00287	772,561,540	'--' steps are assumed incomplete
138	WATER_MAG_00004	M00841	Tetrahydrofolate biosynthesis, mediated by PTPS, GTP => THF	Pathway modules	Metabolism of cofactors and vitamins	Cofactor and vitamin metabolism	K01495 K22101 K13941 K11754 K13998	0.2	FALSE	K11754	62084	None
139	WATER_MAG_00004	M00880	Molybdenum cofactor biosynthesis, GTP => molybdenum cofactor	Pathway modules	Metabolism of cofactors and vitamins	Cofactor and vitamin metabolism	((K03639 K03637),K20967) (K03635,K21142) (((K03831,K03638) K03750),K15376)	0.6	FALSE	K03639,K03750,K03638	1,686,523,431,647,500,000,000,000	None
140	WATER_MAG_00004	M00140	C1-unit interconversion, prokaryotes	Pathway modules	Metabolism of cofactors and vitamins	Cofactor and vitamin metabolism	K00600 (K01491,(K00300 K01500)) K01938	1	TRUE	K01491,K01938,K00600	164,922,106,615,806,000,000,000,000,000	None
141	WATER_MAG_00004	M00141	C1-unit interconversion, eukaryotes	Pathway modules	Metabolism of cofactors and vitamins	Cofactor and vitamin metabolism	K00600 (K00288,(K13403 K13402))	0.5	FALSE	K00600	15,806,280,541,887,500,000	None
142	WATER_MAG_00004	M00846	Siroheme biosynthesis, glutamyl-tRNA => siroheme	Pathway modules	Metabolism of cofactors and vitamins	Cofactor and vitamin metabolism	K02492 K01845 K01698 K01749 (K01719,K13542,K13543) (K02302,(K00589,K02303,K02496,K13542,K13543)+K02304-K03794)	0.416666667	FALSE	K01698,K01719,K02304	17,951,756,243,906	None
143	WATER_MAG_00004	M00868	Heme biosynthesis, animals and fungi, glycine => heme	Pathway modules	Metabolism of cofactors and vitamins	Cofactor and vitamin metabolism	K00643 K01698 K01749 K01719 K01599 K00228 K00231 K01772	0.5	FALSE	K01698,K01772,K00228,K01719	1,795,154,019,524,400,000	None
144	WATER_MAG_00004	M00121	Heme biosynthesis, plants and bacteria, glutamate => heme	Pathway modules	Metabolism of cofactors and vitamins	Cofactor and vitamin metabolism	K01885 K02492 K01845 K01698 K01749 (K01719,K13542,K13543) K01599 (K00228,K02495) (K00230,K00231,K08973) K01772	0.6	FALSE	K02495,K01698,K01885,K01772,K08973,K00230,K00228,K01719	2,453,417,951,248,540,000,000,000,000,000,000,000,000,000,000,000	None
145	WATER_MAG_00004	M00926	Heme biosynthesis, bacteria, glutamyl-tRNA => coproporphyrin III => heme	Pathway modules	Metabolism of cofactors and vitamins	Cofactor and vitamin metabolism	K02492 K01845 K01698 K01749 (K01719,K13542) K01599 K00231 K01772 K00435	0.333333333	FALSE	K01698,K01772,K01719	17,951,540,197,562	None
146	WATER_MAG_00004	M00924	Cobalamin biosynthesis, anaerobic, uroporphyrinogen III => sirohydrochlorin => cobyrinate a,c-diamide	Pathway modules	Metabolism of cofactors and vitamins	Cofactor and vitamin metabolism	(K02302,(K02303,K13542) K02304) (K02190,K03795,K22011) K03394 (K05934,K13541,K21479) K05936 (K02189,K13541) K02188 K05895 (K02191 K03399,K00595) K06042 K02224	0.5	FALSE	K06042,K03795,K02224,K02189,K03394,K02304	16,976,169,775,692,400,000,000,000,000,000,000,000	None
147	WATER_MAG_00004	M00925	Cobalamin biosynthesis, aerobic, uroporphyrinogen III => precorrin 2 => cobyrinate a,c-diamide	Pathway modules	Metabolism of cofactors and vitamins	Cofactor and vitamin metabolism	(K02303,K13542) (K03394,K13540) K02229 (K05934,K13540,K13541) K05936 K02228 K05895 K00595 K06042 K02224 K02230+K09882+K09883	0.303030303	FALSE	K06042,K02224,K03394,K02230	1,697,656,924,612,360,000	None
148	WATER_MAG_00004	M00122	Cobalamin biosynthesis, cobyrinate a,c-diamide => cobalamin	Pathway modules	Metabolism of cofactors and vitamins	Cofactor and vitamin metabolism	(K00798,K19221) K02232 (K02225,K02227) K02231 K00768 (K02226,K22316) K02233	0.571428571	FALSE	K02231,K19221,K00798,K02232,K02225	2,068,421,162,598,490,000,000	None
149	WATER_MAG_00004	M00117	Ubiquinone biosynthesis, prokaryotes, chorismate (+ polyprenyl-PP) => ubiquinol	Pathway modules	Metabolism of cofactors and vitamins	Cofactor and vitamin metabolism	(K03181,K18240) K03179 (K03182+K03186) K18800 K00568 K03185 K03183 K03184 K00568	0.555555556	FALSE	K03179,K00568,K03185,K03183	848,764,795,518,706,000,000,000	None
150	WATER_MAG_00004	M00116	Menaquinone biosynthesis, chorismate (+ polyprenyl-PP) => menaquinol	Pathway modules	Metabolism of cofactors and vitamins	Cofactor and vitamin metabolism	K02552 K02551 K08680 K02549 K01911 K01661 K19222 K02548 K03183	0.111111111	FALSE	K03183	60307	None
151	WATER_MAG_00004	M00095	C5 isoprenoid biosynthesis, mevalonate pathway	Pathway modules	Biosynthesis of terpenoids and polyketides	Terpenoid backbone biosynthesis	K00626 K01641 K00021 K00869 (K00938,K13273) K01597 K01823	0.142857143	FALSE	K00626	30,246,551,031,255,600,000,000,000,000,000,000	None
152	WATER_MAG_00004	M00849	C5 isoprenoid biosynthesis, mevalonate pathway, archaea	Pathway modules	Biosynthesis of terpenoids and polyketides	Terpenoid backbone biosynthesis	K00626 K01641 (K00021,K00054) ((K00869 K17942),(K18689 K18690 K22813)) K06981 K01823	0.142857143	FALSE	K00626	30,246,551,031,255,600,000,000,000,000,000,000	None
153	WATER_MAG_00004	M00096	C5 isoprenoid biosynthesis, non-mevalonate pathway	Pathway modules	Biosynthesis of terpenoids and polyketides	Terpenoid backbone biosynthesis	K01662 K00099 (K00991,K12506) K00919 (K01770,K12506) K03526 K03527 K01823	0.375	FALSE	K03527,K03526,K00919	41,695,329,742,341	None
154	WATER_MAG_00004	M00778	Type II polyketide backbone biosynthesis, acyl-CoA + malonyl-CoA => polyketide	Pathway modules	Biosynthesis of terpenoids and polyketides	Type II polyketide biosynthesis	K05551+K05552+K05553 -K12420 ((K05554,K14249,K15884,K15885) (K05555,K14250),K15886)	0.333333333	FALSE	K05555	250,064,363	No KOfam profile for K14249,No KOfam profile for K15886
155	WATER_MAG_00004	M00848	Aurachin biosynthesis, anthranilate => aurachin A	Pathway modules	Biosynthesis of other secondary metabolites	Biosynthesis of other antibiotics	K09460 K02078+K14245+K14246+K22798 K22799 K22800 K21272 K21271 K22801 K22802	0.03125	FALSE	K02078	33940	No KOfam profile for K09460,No KOfam profile for K14245,No KOfam profile for K14246,No KOfam profile for K22798,No KOfam profile for K22799,No KOfam profile for K22800,No KOfam profile for K21272,No KOfam profile for K21271,No KOfam profile for K22801,No KOfam profile for K22802
156	WATER_MAG_00004	M00835	Pyocyanine biosynthesis, chorismate => pyocyanine	Pathway modules	Biosynthesis of other secondary metabolites	Biosynthesis of other bacterial compounds	K13063 K20261 K06998 K20260 K20262 K21103 K20940	0.142857143	FALSE	K06998	59544	None
157	WATER_MAG_00004	M00878	Phenylacetate degradation, phenylaxetate => acetyl-CoA/succinyl-CoA	Pathway modules	Xenobiotics biodegradation	Aromatics degradation	K01912 K02609+K02610+K02611+K02612+K02613 K15866 K02618 K02615 K01692 K00074	0.657142857	FALSE	K02609,K02611,K02610,K01912,K01692,K00074,K15866	3,024,766,176,619,660,000,000,000,000,000,000,000,000,000,000	None
158	WATER_MAG_00004	M00545	Trans-cinnamate degradation, trans-cinnamate => acetyl-CoA	Pathway modules	Xenobiotics biodegradation	Aromatics degradation	(((K05708+K05709+K05710+K00529) K05711),K05712) K05713 K05714 K02554 K01666 K04073	0.166666667	FALSE	K05712,K00529	84,382,001,146,380	None
159	WATER_MAG_00004	M00575	Pertussis pathogenicity signature, T1SS	Signature modules	Gene set	Pathogenicity	K22944 K11004 K07389 K11003 K12340	0.2	FALSE	K12340	14867	None
160	WATER_MAG_00004	M00651	Vancomycin resistance, D-Ala-D-Lac type	Signature modules	Gene set	Drug resistance	(K18345 K18344 K07260 K18346),(K18351 K18352 K18354 K18353) (K18347 K15739 K08641)	0.142857143	FALSE	K18353	58232	No KOfam profile for K18354
161	WATER_MAG_00004	M00744	Cationic antimicrobial peptide (CAMP) resistance, protease PgtE	Signature modules	Gene set	Drug resistance	K07637 K07660 K08477	0.333333333	FALSE	K07637	36330	None
162	WATER_MAG_00004	M00769	Multidrug resistance, efflux pump MexPQ-OpmE	Signature modules	Gene set	Drug resistance	K18304 K19591 K19595+K19594+K19593	0.333333333	FALSE	K19591	63446	None
163	WATER_MAG_00004	M00696	Multidrug resistance, efflux pump AcrEF-TolC	Signature modules	Gene set	Drug resistance	K18140 K18141+K18142+K12340	0.166666667	FALSE	K12340	14867	None
164	WATER_MAG_00004	M00697	Multidrug resistance, efflux pump MdtEF-TolC	Signature modules	Gene set	Drug resistance	K07690 K18898+K18899+K12340	0.166666667	FALSE	K12340	14867	None
165	WATER_MAG_00004	M00611	Oxygenic photosynthesis in plants and cyanobacteria	Signature modules	Module set	Metabolic capacity	(M00161,M00163) M00165	0.318181818	FALSE	K00134,K00927,K01807,K01623,K00615	1,703,775,322,742,370,000,000,000,000,000,000,000,000,000	No KOfam profile for M00161,No KOfam profile for M00163,No KOfam profile for M00165
166	WATER_MAG_00004	M00612	Anoxygenic photosynthesis in purple bacteria	Signature modules	Module set	Metabolic capacity	M00597 M00165	0.318181818	FALSE	K00134,K00927,K01807,K01623,K00615	1,703,775,322,742,370,000,000,000,000,000,000,000,000,000	No KOfam profile for M00165,No KOfam profile for M00597
167	WATER_MAG_00004	M00613	Anoxygenic photosynthesis in green nonsulfur bacteria	Signature modules	Module set	Metabolic capacity	M00597 M00376	0.16025641	FALSE	K00242,K00241,K05606,K14449,K00240,K08691,K01966,K01849	287,372,873,826,854,000,000,000,000,000,000,000,000,000,000	No KOfam profile for M00597,No KOfam profile for M00376
168	WATER_MAG_00004	M00614	Anoxygenic photosynthesis in green sulfur bacteria	Signature modules	Module set	Metabolic capacity	M00598 M00173	0.229166667	FALSE	K00242,K00241,K01902,K00240,K01006,K00024,K15234,K01682,K01903	287,372,873,829,782,000,000,000,000,000,000,000,000,000,000	No KOfam profile for M00598,No KOfam profile for M00173
169	WATER_MAG_00004	M00617	Methanogen	Signature modules	Module set	Metabolic capacity	M00567,M00357,M00356,M00563	0.2	FALSE	K01895,K14083	51,386,336,195,677,900,000	None
170	WATER_MAG_00004	M00618	Acetogen	Signature modules	Module set	Metabolic capacity	M00377 M00579	0.214285714	FALSE	K01491,K01938,K00297	164,922,106,644,267	No KOfam profile for M00377,No KOfam profile for M00579
171	WATER_MAG_00004	M00615	Nitrate assimilation	Signature modules	Module set	Metabolic capacity	(K02575,K15576+K15577+K15578-K15579) M00531	0.5	FALSE	K02575	4,132,238,206	No KOfam profile for M00531
172	WATER_MAG_00004	M00616	Sulfate-sulfur assimilation	Signature modules	Module set	Metabolic capacity	(K02048,K23163)+K02046+K02047+K02045 M00176	0.333333333	FALSE	K00958,K00390,K00381	502,204,125,724,761	No KOfam profile for M00176
0	WATER_MAG_00005	M00001	Glycolysis (Embden-Meyerhof pathway), glucose => pyruvate	Pathway modules	Carbohydrate metabolism	Central carbohydrate metabolism	(K00844,K12407,K00845,K00886,K08074,K00918) (K01810,K06859,K13810,K15916) (K00850,K16370,K21071,K00918) (K01623,K01624,K11645,K16305,K16306) K01803 ((K00134,K00150) K00927,K11389) (K01834,K15633,K15634,K15635) K01689 (K00873,K12406)	0.3	FALSE	K00134,K01689,K01803	393,961,852,644,111	None
1	WATER_MAG_00005	M00002	Glycolysis, core module involving three-carbon compounds	Pathway modules	Carbohydrate metabolism	Central carbohydrate metabolism	K01803 ((K00134,K00150) K00927,K11389) (K01834,K15633,K15634,K15635) K01689 (K00873,K12406)	0.5	FALSE	K00134,K01689,K01803	393,961,852,644,111	None
2	WATER_MAG_00005	M00003	Gluconeogenesis, oxaloacetate => fructose-6P	Pathway modules	Carbohydrate metabolism	Central carbohydrate metabolism	(K01596,K01610) K01689 (K01834,K15633,K15634,K15635) K00927 (K00134,K00150) K01803 ((K01623,K01624,K11645) (K03841,K02446,K11532,K01086,K04041),K01622)	0.428571429	FALSE	K00134,K01689,K01803	393,961,852,644,111	None
3	WATER_MAG_00005	M00307	Pyruvate oxidation, pyruvate => acetyl-CoA	Pathway modules	Carbohydrate metabolism	Central carbohydrate metabolism	((K00163,K00161+K00162)+K00627+K00382-K13997),K00169+K00170+K00171+(K00172,K00189),K03737	1	TRUE	K00627,K00163,K00382	375,455,477,037,982,000,000,000	None
4	WATER_MAG_00005	M00009	Citrate cycle (TCA cycle, Krebs cycle)	Pathway modules	Carbohydrate metabolism	Central carbohydrate metabolism	(K01647,K05942) (K01681,K01682) (K00031,K00030) (K00164+K00658+K00382,K00174+K00175-K00177-K00176) (K01902+K01903,K01899+K01900,K18118) (K00234+K00235+K00236+K00237,K00239+K00240+K00241-(K00242,K18859,K18860),K00244+K00245+K00246-K00247) (K01676,K01679,K01677+K01678) (K00026,K00025,K00024,K00116)	0.4375	FALSE	K00024,K00239,K00382,K00031,K01902,K00240,K00242	6,363,043,916,565,120,000,000,000,000,000,000,000,000,000,000,000	None
5	WATER_MAG_00005	M00010	Citrate cycle, first carbon oxidation, oxaloacetate => 2-oxoglutarate	Pathway modules	Carbohydrate metabolism	Central carbohydrate metabolism	(K01647,K05942) (K01681,K01682) (K00031,K00030)	0.333333333	FALSE	K00031	24958	None
6	WATER_MAG_00005	M00011	Citrate cycle, second carbon oxidation, 2-oxoglutarate => oxaloacetate	Pathway modules	Carbohydrate metabolism	Central carbohydrate metabolism	(K00164+K00658+K00382,K00174+K00175-K00177-K00176) (K01902+K01903,K01899+K01900,K18118) (K00234+K00235+K00236+K00237,K00239+K00240+K00241-(K00242,K18859,K18860),K00244+K00245+K00246-K00247) (K01676,K01679,K01677+K01678) (K00026,K00025,K00024,K00116)	0.5	FALSE	K00024,K00239,K00382,K01902,K00240,K00242	63,630,439,165,651,100,000,000,000,000,000,000,000,000,000	None
7	WATER_MAG_00005	M00004	Pentose phosphate pathway (Pentose phosphate cycle)	Pathway modules	Carbohydrate metabolism	Central carbohydrate metabolism	(K13937,((K00036,K19243) (K01057,K07404))) K00033 K01783 (K01807,K01808) K00615 K00616 (K01810,K06859,K13810,K15916)	0.428571429	FALSE	K01783,K00615,K01808	353,118,664,156,941,000,000,000	None
8	WATER_MAG_00005	M00007	Pentose phosphate pathway, non-oxidative phase, fructose 6P => ribose 5P	Pathway modules	Carbohydrate metabolism	Central carbohydrate metabolism	K00615 (K00616,K13810) K01783 (K01807,K01808)	0.75	TRUE	K01783,K00615,K01808	353,118,664,156,941,000,000,000	None
9	WATER_MAG_00005	M00308	Semi-phosphorylative Entner-Doudoroff pathway, gluconate => glycerate-3P	Pathway modules	Carbohydrate metabolism	Central carbohydrate metabolism	K05308 K00874 K01625 (K00134 K00927,K00131,K18978)	0.2	FALSE	K00134	39396	None
10	WATER_MAG_00005	M00632	Galactose degradation, Leloir pathway, galactose => alpha-D-glucose-1P	Pathway modules	Carbohydrate metabolism	Other carbohydrate metabolism	K01785 K00849 K00965 K01784	0.25	FALSE	K01785	353,787,897	None
11	WATER_MAG_00005	M00552	D-galactonate degradation, De Ley-Doudoroff pathway, D-galactonate => glycerate-3P	Pathway modules	Carbohydrate metabolism	Other carbohydrate metabolism	K01684 K00883 K01631 K00134 K00927	0.2	FALSE	K00134	39396	None
12	WATER_MAG_00005	M00892	UDP-N-acetyl-D-glucosamine biosynthesis, eukaryotes, glucose => UDP-GlcNAc	Pathway modules	Carbohydrate metabolism	Other carbohydrate metabolism	(K00844,K12407,K00845) K01810 K00820 K00621 K01836 K00972	0.166666667	FALSE	K00820	5,574,834,258	None
13	WATER_MAG_00005	M00909	UDP-N-acetyl-D-glucosamine biosynthesis, prokaryotes, glucose => UDP-GlcNAc	Pathway modules	Carbohydrate metabolism	Other carbohydrate metabolism	K00845 (K01810,K13810,K15916) K00820 K03431 K04042	0.4	FALSE	K00820,K03431	557,483,425,821,103	None
14	WATER_MAG_00005	M00012	Glyoxylate cycle	Pathway modules	Carbohydrate metabolism	Other carbohydrate metabolism	K01647 (K01681,K01682) K01637 (K01638,K19282) (K00026,K00025,K00024)	0.6	FALSE	K00024,K01638,K01637	636,302,259,018,179	None
15	WATER_MAG_00005	M00373	Ethylmalonyl pathway	Pathway modules	Carbohydrate metabolism	Other carbohydrate metabolism	K00626 K00023 K17865 K14446 K14447 K14448 K14449 K08691 K14451 K01965+K01966 K05606 K01847	0.083333333	FALSE	K00626	557,055,222	None
16	WATER_MAG_00005	M00740	Methylaspartate cycle	Pathway modules	Carbohydrate metabolism	Other carbohydrate metabolism	K01647 K01681 K00031 K00261 K19268+K01846 K04835 K19280 K14449 K19281 K19282 K00024	0.181818182	FALSE	K00024,K00031	6,363,024,958	None
17	WATER_MAG_00005	M00532	Photorespiration	Pathway modules	Carbohydrate metabolism	Other carbohydrate metabolism	(K01601-K01602) K19269 K11517 K03781 K14272 K00600 K00830 (K15893,K15919) K15918 K00281+K00605+K00382+K02437	0.275	FALSE	K01601,K02437,K00382,K00605,K00600	4,807,413,301,565,110,000,000,000,000,000,000,000,000,000	None
18	WATER_MAG_00005	M00013	Malonate semialdehyde pathway, propanoyl-CoA => acetyl-CoA	Pathway modules	Carbohydrate metabolism	Other carbohydrate metabolism	(K00248,K00232) (K07511,K14729) K05605 K23146 K00140	0.2	FALSE	K00140	63629	None
19	WATER_MAG_00005	M00165	Reductive pentose phosphate cycle (Calvin cycle)	Pathway modules	Energy metabolism	Carbon fixation	K00855 (K01601-K01602) K00927 (K05298,K00150,K00134) (K01623,K01624) (K03841,K02446,K11532,K01086) K00615 (K01623,K01624) (K01100,K11532,K01086) K00615 (K01807,K01808)	0.454545455	FALSE	K00134,K01601,K00615,K01808	39,396,480,748,664,100,000,000,000,000	No KOfam profile for M00165
20	WATER_MAG_00005	M00166	Reductive pentose phosphate cycle, ribulose-5P => glyceraldehyde-3P	Pathway modules	Energy metabolism	Carbon fixation	K00855 (K01601-K01602) K00927 (K05298,K00150,K00134)	0.5	FALSE	K00134,K01601	3,939,648,074	None
21	WATER_MAG_00005	M00167	Reductive pentose phosphate cycle, glyceraldehyde-3P => ribulose-5P	Pathway modules	Energy metabolism	Carbon fixation	(K01623,K01624) (K03841,K02446,K11532,K01086) K00615 (K01623,K01624) (K01100,K11532,K01086) K00615 (K01807,K01808)	0.428571429	FALSE	K00615,K01808	8,664,156,941,569,550,000	None
22	WATER_MAG_00005	M00168	CAM (Crassulacean acid metabolism), dark	Pathway modules	Energy metabolism	Carbon fixation	K01595 (K00025,K00026,K00024)	1	TRUE	K00024,K01595	6,363,019,655	None
23	WATER_MAG_00005	M00169	CAM (Crassulacean acid metabolism), light	Pathway modules	Energy metabolism	Carbon fixation	K00029 K01006	0.5	FALSE	K01006	17402	None
24	WATER_MAG_00005	M00172	C4-dicarboxylic acid cycle, NADP - malic enzyme type	Pathway modules	Energy metabolism	Carbon fixation	K01595 K00051 K00029 K01006	0.5	FALSE	K01006,K01595	1,740,219,655	None
25	WATER_MAG_00005	M00171	C4-dicarboxylic acid cycle, NAD - malic enzyme type	Pathway modules	Energy metabolism	Carbon fixation	K01595 K14454 K14455 (K00025,K00026) K00028 (K00814,K14272) K01006	0.285714286	FALSE	K01006,K01595	1,740,219,655	None
26	WATER_MAG_00005	M00170	C4-dicarboxylic acid cycle, phosphoenolpyruvate carboxykinase type	Pathway modules	Energy metabolism	Carbon fixation	K01595 K14454 K14455 K01610	0.25	FALSE	K01595	19655	None
27	WATER_MAG_00005	M00173	Reductive citrate cycle (Arnon-Buchanan cycle)	Pathway modules	Energy metabolism	Carbon fixation	(K00169+K00170+K00171+K00172,K03737) ((K01007,K01006) K01595,K01959+K01960,K01958) K00024 (K01676,K01679,K01677+K01678) (K00239+K00240-K00241-K00242,K00244+K00245-K00246-K00247,K18556+K18557+K18558+K18559+K18560) (K01902+K01903) (K00174+K00175-K00177-K00176) K00031 (K01681,K01682) (K15230+K15231,K15232+K15233 K15234)	0.5	FALSE	K00024,K00239,K01006,K00031,K01902,K01595,K00240,K00242	63,630,439,161,740,200,000,000,000,000,000,000,000,000,000,000,000	No KOfam profile for M00173
28	WATER_MAG_00005	M00376	3-Hydroxypropionate bi-cycle	Pathway modules	Energy metabolism	Carbon fixation	(K02160+K01961+K01962+K01963) K14468 K14469 K15052 K05606 (K01847,K01848+K01849) (K14471+K14472) (K00239+K00240+K00241) K01679 K08691 K14449 K14470 K09709	0.070512821	FALSE	K00239,K00240,K02160	4,391,636,026,360,270,000,000,000	No KOfam profile for M00376
29	WATER_MAG_00005	M00375	Hydroxypropionate-hydroxybutylate cycle	Pathway modules	Energy metabolism	Carbon fixation	(K01964+K15037+K15036) K15017 K15039 K15018 K15019 K15020 K05606 (K01848+K01849) (K15038,K15017) K14465 (K14466,K18861) K14534 K15016 K00626	0.071428571	FALSE	K00626	557,055,222	None
30	WATER_MAG_00005	M00374	Dicarboxylate-hydroxybutyrate cycle	Pathway modules	Energy metabolism	Carbon fixation	(K00169+K00170+K00171+K00172) K01007 K01595 K00024 (K01677+K01678) (K00239+K00240-K00241-K18860) (K01902+K01903) (K15038,K15017) K14465 (K14467,K18861) K14534 K15016 K00626	0.346153846	FALSE	K00024,K00239,K00626,K01902,K01595,K00240	63,630,439,165,570,100,000,000,000,000,000,000,000,000,000	None
31	WATER_MAG_00005	M00377	Reductive acetyl-CoA pathway (Wood-Ljungdahl pathway)	Pathway modules	Energy metabolism	Carbon fixation	K00198 K05299-K15022 K01938 K01491 K00297 K15023 K14138+K00197+K00194	0.285714286	FALSE	K01491,K01938	19,557,939,426,598	No KOfam profile for M00377
32	WATER_MAG_00005	M00620	Incomplete reductive citrate cycle, acetyl-CoA => oxoglutarate	Pathway modules	Energy metabolism	Carbon fixation	(K00169+K00170+K00171+K00172) (K01959+K01960) K00024 (K01677+K01678) (K18209+K18210) (K01902+K01903) (K00174+K00175+K00176+K00177)	0.214285714	FALSE	K00024,K01902	6,363,015,110	None
33	WATER_MAG_00005	M00357	Methanogenesis, acetate => methane	Pathway modules	Energy metabolism	Methane metabolism	((K00925 K00625),K01895) (K00193+K00197+K00194) (K00577+K00578+K00579+K00580+K00581-K00582-K00583+K00584) (K00399+K00401+K00402) (K22480+K22481+K22482,K03388+K03389+K03390,K08264+K08265,K03388+K03389+K03390+K14127+(K14126+K14128,K22516+K00125))	0.2	FALSE	K01895	16,333,745,911,471	None
34	WATER_MAG_00005	M00346	Formaldehyde assimilation, serine pathway	Pathway modules	Energy metabolism	Methane metabolism	K00600 K00830 K00018 K11529 K01689 K01595 K00024 K08692+K14067 K08691	0.444444444	FALSE	K00024,K01689,K00600,K01595	636,301,852,657,951,000,000,000	None
35	WATER_MAG_00005	M00596	Dissimilatory sulfate reduction, sulfate => H2S	Pathway modules	Energy metabolism	Sulfur metabolism	K00958 (K00394+K00395) (K11180+K11181)	0.333333333	FALSE	K00394,K00395	320,061,200,512,006	None
36	WATER_MAG_00005	M00144	NADH:quinone oxidoreductase, prokaryotes	Pathway modules	Energy metabolism	ATP synthesis	K00330+(K00331+K00332+K00333,K00331+K13378,K13380)+K00334+K00335+K00336+K00337+K00338+K00339+K00340+(K00341+K00342)+K00343	0.461538462	FALSE	K00331,K00330,K00341,K00340,K00338,K00339	386,933,869,439,137,000,000,000,000	None
37	WATER_MAG_00005	M00142	NADH:ubiquinone oxidoreductase, mitochondria	Pathway modules	Energy metabolism	ATP synthesis	K03878+K03879+K03880+K03881+K03882+K03883+K03884	0.142857143	FALSE	K03880	38694	None
38	WATER_MAG_00005	M00149	Succinate dehydrogenase, prokaryotes	Pathway modules	Energy metabolism	ATP synthesis	K00241+(K00242,K18859,K18860)+K00239+K00240	0.75	TRUE	K00239,K00240,K00242	4,391,636,026,360,270,000,000,000	None
39	WATER_MAG_00005	M00151	Cytochrome bc1 complex respiratory unit	Pathway modules	Energy metabolism	ATP synthesis	((K00412+K00413,K00410)+K00411),K03886+K03887+K03888,K03890+K03891+K03889	1	TRUE	K00413,K00412,K00411	125,831,258,212,581	None
40	WATER_MAG_00005	M00152	Cytochrome bc1 complex	Pathway modules	Energy metabolism	ATP synthesis	K00411+K00412+K00413+K00414+K00415+K00416+K00417+K00418+K00419+K00420	0.3	FALSE	K00413,K00412,K00411	125,831,258,212,581	None
41	WATER_MAG_00005	M00154	Cytochrome c oxidase	Pathway modules	Energy metabolism	ATP synthesis	(K02257+K02262+K02256+K02261+K02263+K02264+K02265+K02266+K02267+K02268+K02270-K02271+K02272-K02273+K02258+K02259+K02260)	0.133333333	FALSE	K02258,K02257	5,520,162,096,207	None
42	WATER_MAG_00005	M00155	Cytochrome c oxidase, prokaryotes	Pathway modules	Energy metabolism	ATP synthesis	K02275+(K02274+K02276,K15408)-K02277	0.666666667	FALSE	K02276,K02275	5,520,032,296	None
43	WATER_MAG_00005	M00157	F-type ATPase, prokaryotes and chloroplasts	Pathway modules	Energy metabolism	ATP synthesis	K02111+K02112+K02113+K02114+K02115+K02108+K02109+K02110	0.875	TRUE	K02109,K02108,K02111,K02112,K02113,K02114,K02115	5,658,456,583,565,810,000,000,000,000,000,000,000,000,000	None
44	WATER_MAG_00005	M00158	F-type ATPase, eukaryotes	Pathway modules	Energy metabolism	ATP synthesis	K02132+K02133+K02136+K02134+K02135+K02137+K02126+K02127+K02128+K02138+(K02129,K01549)+(K02130,K02139)+K02140+(K02141,K02131)-K02142-K02143+K02125	0.066666667	FALSE	K02125	56583	None
45	WATER_MAG_00005	M00082	Fatty acid biosynthesis, initiation	Pathway modules	Lipid metabolism	Fatty acid metabolism	(K11262,(K02160+K01961,K11263)+(K01962+K01963,K18472)) (K00665,K00667+K00668,K11533,(K00645 (K00648,K18473)))	0.166666667	FALSE	K02160	56949	None
46	WATER_MAG_00005	M00083	Fatty acid biosynthesis, elongation	Pathway modules	Lipid metabolism	Fatty acid metabolism	K00665,(K00667 K00668),K11533,((K00647,K09458) K00059 (K02372,K01716,K16363) (K00208,K02371,K10780,K00209))	0.25	FALSE	K01716	46602	None
47	WATER_MAG_00005	M00086	beta-Oxidation, acyl-CoA synthesis	Pathway modules	Lipid metabolism	Fatty acid metabolism	K01897,K15013	1	TRUE	K01897	59802	None
48	WATER_MAG_00005	M00088	Ketone body biosynthesis, acetyl-CoA => acetoacetate/3-hydroxybutyrate/acetone	Pathway modules	Lipid metabolism	Lipid metabolism	K00626 K01641 K01640 K00019 K01574	0.2	FALSE	K00626	557,055,222	None
49	WATER_MAG_00005	M00093	Phosphatidylethanolamine (PE) biosynthesis, PA => PS => PE	Pathway modules	Lipid metabolism	Lipid metabolism	K00981 (K00998,K17103) K01613	0.333333333	FALSE	K01613	24959	None
50	WATER_MAG_00005	M00048	Inosine monophosphate biosynthesis, PRPP + glutamine => IMP	Pathway modules	Nucleotide metabolism	Purine metabolism	K00764 (K01945,K11787,K11788,K13713) (K00601,K11175,K08289,K11787,K01492) (K01952,(K23269+K23264+K23265),(K23270+K23265)) (K01933,K11787,K11788 (K01587,K11808,K01589 K01588)) (K01923,K01587,K13713) K01756 (K00602,(K01492,K06863 K11176))	0.4	FALSE	K01588,K01589,K01923,K00764	5,220,952,210,508,330,000,000,000	None
51	WATER_MAG_00005	M00049	Adenine ribonucleotide biosynthesis, IMP => ADP,ATP	Pathway modules	Nucleotide metabolism	Purine metabolism	K01939 K01756 (K00939,K18532,K18533,K00944) (K00940,K00873,K12406)	0.25	FALSE	K01939	27222	None
52	WATER_MAG_00005	M00050	Guanine ribonucleotide biosynthesis IMP => GDP,GTP	Pathway modules	Nucleotide metabolism	Purine metabolism	K00088 K01951 K00942 (K00940,K18533,K00873,K12406)	0.25	FALSE	K01951	5,931,852,382	None
53	WATER_MAG_00005	M00546	Purine degradation, xanthine => urea	Pathway modules	Nucleotide metabolism	Purine metabolism	(K00106,K00087+K13479+K13480,K13481+K13482,K11177+K11178+K13483) (K00365,K16838,K16839,K22879) (K13484,K07127 (K13485,K16838,K16840)) (K01466,K16842) K01477	0.416666667	FALSE	K07127,K13485,K13482	2,360,236,115,215	None
54	WATER_MAG_00005	M00051	Uridine monophosphate biosynthesis, glutamine (+ PRPP) => UMP	Pathway modules	Nucleotide metabolism	Pyrimidine metabolism	(K11540,(K11541 K01465),((K01954,K01955+K01956) (K00609+K00610,K00608) K01465)) (K00226,K00254,K17828) (K13421,K00762 K01591)	0.333333333	FALSE	K00254,K00609	24,345,269,915,466,700,000	None
55	WATER_MAG_00005	M00052	Pyrimidine ribonucleotide biosynthesis, UMP => UDP/UTP,CDP/CTP	Pathway modules	Nucleotide metabolism	Pyrimidine metabolism	(K13800,K13809,K09903) (K00940,K18533) K01937	0.333333333	FALSE	K01937	4,411,318,524	None
56	WATER_MAG_00005	M00053	Pyrimidine deoxyribonuleotide biosynthesis, CDP/CTP => dCDP/dCTP,dTDP/dTTP	Pathway modules	Nucleotide metabolism	Pyrimidine metabolism	(K00524,K00525+K00526,K10807+K10808) (K00940,K18533) (K00527,K21636) K01494 K01520 (K00560,K13998) K00943 K00940	0.375	FALSE	K00525,K00526,K01520,K01494	147,947,013,215,121,000,000,000,000,000,000	None
57	WATER_MAG_00005	M00018	Threonine biosynthesis, aspartate => homoserine => threonine	Pathway modules	Amino acid metabolism	Serine and threonine metabolism	(K00928,K12524,K12525,K12526) K00133 (K00003,K12524,K12525) (K00872,K02204,K02203) K01733	0.6	FALSE	K01733,K00133,K00003	5,519,827,858,182,840,000	None
58	WATER_MAG_00005	M00555	Betaine biosynthesis, choline => betaine	Pathway modules	Amino acid metabolism	Serine and threonine metabolism	(K17755,((K00108,K11440,K00499) (K00130,K14085)))	0.5	FALSE	K00499,K00108	13,827,642,828,256	None
59	WATER_MAG_00005	M00033	Ectoine biosynthesis, aspartate => ectoine	Pathway modules	Amino acid metabolism	Serine and threonine metabolism	K00928 K00133 K00836 K06718 K06720	0.2	FALSE	K00133	27858	None
60	WATER_MAG_00005	M00021	Cysteine biosynthesis, serine => cysteine	Pathway modules	Amino acid metabolism	Cysteine and methionine metabolism	(K00640,K23304) (K01738,K13034,K17069)	0.5	FALSE	K01738	55377	None
61	WATER_MAG_00005	M00609	Cysteine biosynthesis, methionine => cysteine	Pathway modules	Amino acid metabolism	Cysteine and methionine metabolism	K00789 K17462 K01243 K07173 K17216 K17217	0.166666667	FALSE	K00789	26760	None
62	WATER_MAG_00005	M00017	Methionine biosynthesis, apartate => homoserine => methionine	Pathway modules	Amino acid metabolism	Cysteine and methionine metabolism	(K00928,K12524,K12525) K00133 (K00003,K12524,K12525) (K00651,K00641) K01739 (K01760,K14155) (K00548,K24042,K00549)	0.428571429	FALSE	K00641,K00133,K00003	594,462,785,844,160	None
63	WATER_MAG_00005	M00034	Methionine salvage pathway	Pathway modules	Amino acid metabolism	Cysteine and methionine metabolism	K00789 K01611 K00797 ((K01243,K01244) K00899,K00772) K08963 (K16054,K08964 (K09880,K08965 K08966)) K08967 (K00815,K08969,K23977,K00832,K00838)	0.375	FALSE	K01611,K00789,K08963	514,302,676,051,432	None
64	WATER_MAG_00005	M00035	Methionine degradation	Pathway modules	Amino acid metabolism	Cysteine and methionine metabolism	K00789 (K00558,K17398,K17399) K01251 (K01697,K10150)	0.5	FALSE	K01251,K00789	4,213,826,760	None
65	WATER_MAG_00005	M00368	Ethylene biosynthesis, methionine => ethylene	Pathway modules	Amino acid metabolism	Cysteine and methionine metabolism	K00789 (K01762,K20772) K05933	0.333333333	FALSE	K00789	26760	None
66	WATER_MAG_00005	M00019	Valine/isoleucine biosynthesis, pyruvate => valine / 2-oxobutanoate => isoleucine	Pathway modules	Amino acid metabolism	Branched-chain amino acid metabolism	K01652+(K01653,K11258) K00053 K01687 K00826	0.625	FALSE	K00053,K01652,K01687	45,464,186,744,068,200,000	None
67	WATER_MAG_00005	M00535	Isoleucine biosynthesis, pyruvate => 2-oxobutanoate	Pathway modules	Amino acid metabolism	Branched-chain amino acid metabolism	K09011 K01703+K01704 K00052	0.666666667	FALSE	K00052,K01703,K01704	4,162,433,695,178,980,000,000,000	None
68	WATER_MAG_00005	M00570	Isoleucine biosynthesis, threonine => 2-oxobutanoate => isoleucine	Pathway modules	Amino acid metabolism	Branched-chain amino acid metabolism	(K17989,K01754) K01652+(K01653,K11258) K00053 K01687 K00826	0.5	FALSE	K00053,K01652,K01687	45,464,186,744,068,200,000	None
69	WATER_MAG_00005	M00432	Leucine biosynthesis, 2-oxoisovalerate => 2-oxoisocaproate	Pathway modules	Amino acid metabolism	Branched-chain amino acid metabolism	K01649 (K01702,K01703+K01704) K00052	1	TRUE	K00052,K01703,K01649,K01704	41,624,336,956,363,800,000,000,000,000,000,000	None
70	WATER_MAG_00005	M00036	Leucine degradation, leucine => acetoacetate + acetyl-CoA	Pathway modules	Amino acid metabolism	Branched-chain amino acid metabolism	K00826 ((K00166+K00167,K11381)+K09699+K00382) (K00253,K00249) (K01968+K01969) (K05607,K13766) K01640	0.055555556	FALSE	K00382	565,162,471	None
71	WATER_MAG_00005	M00016	Lysine biosynthesis, succinyl-DAP pathway, aspartate => lysine	Pathway modules	Amino acid metabolism	Lysine metabolism	(K00928,K12524,K12525,K12526) K00133 K01714 K00215 K00674 (K00821,K14267) K01439 K01778 (K01586,K12526)	0.444444444	FALSE	K01778,K00133,K01714,K01586	47,877,278,581,143,200,000	None
72	WATER_MAG_00005	M00525	Lysine biosynthesis, acetyl-DAP pathway, aspartate => lysine	Pathway modules	Amino acid metabolism	Lysine metabolism	K00928 K00133 K01714 K00215 K05822 K00841 K05823 K01778 K01586	0.444444444	FALSE	K01778,K00133,K01714,K01586	47,877,278,581,143,200,000	None
73	WATER_MAG_00005	M00526	Lysine biosynthesis, DAP dehydrogenase pathway, aspartate => lysine	Pathway modules	Amino acid metabolism	Lysine metabolism	(K00928,K12524,K12525,K12526) K00133 K01714 K00215 K03340 (K01586,K12526)	0.5	FALSE	K00133,K01714,K01586	278,581,143,232,217	None
74	WATER_MAG_00005	M00527	Lysine biosynthesis, DAP aminotransferase pathway, aspartate => lysine	Pathway modules	Amino acid metabolism	Lysine metabolism	(K00928,K12524,K12525,K12526) K00133 K01714 K00215 K10206 K01778 (K01586,K12526)	0.571428571	FALSE	K01778,K00133,K01714,K01586	47,877,278,581,143,200,000	None
75	WATER_MAG_00005	M00032	Lysine degradation, lysine => saccharopine => acetoacetyl-CoA	Pathway modules	Amino acid metabolism	Lysine metabolism	K14157 K14085 K00825 (K15791+K00658+K00382) K00252 (K07514,(K07515,K07511) K00022)	0.055555556	FALSE	K00382	565,162,471	None
76	WATER_MAG_00005	M00028	Ornithine biosynthesis, glutamate => ornithine	Pathway modules	Amino acid metabolism	Arginine and proline metabolism	(K00618,K00619,K14681,K14682,K00620,K22477,K22478) ((K00930,K22478) K00145,K12659) (K00818,K00821) (K01438,K14677,K00620)	0.6	FALSE	K00145,K00930,K01438	441,585,803,124,446	None
77	WATER_MAG_00005	M00844	Arginine biosynthesis, ornithine => arginine	Pathway modules	Amino acid metabolism	Arginine and proline metabolism	K00611 K01940 (K01755,K14681)	0.666666667	FALSE	K01755,K01940	412,692,554,022,903	None
78	WATER_MAG_00005	M00845	Arginine biosynthesis, glutamate => acetylcitrulline => arginine	Pathway modules	Amino acid metabolism	Arginine and proline metabolism	K22478 K00145 K00821 K09065 K01438 K01940 K01755	0.571428571	FALSE	K00145,K01755,K01940,K01438	4,415,841,269,255,400,000,000,000	None
79	WATER_MAG_00005	M00029	Urea cycle	Pathway modules	Amino acid metabolism	Arginine and proline metabolism	K01948 K00611 K01940 (K01755,K14681) K01476	0.4	FALSE	K01755,K01940	412,692,554,022,903	None
80	WATER_MAG_00005	M00015	Proline biosynthesis, glutamate => proline	Pathway modules	Amino acid metabolism	Arginine and proline metabolism	((K00931 K00147),K12657) K00286	1	TRUE	K00147,K00931,K00286	157,516,153,164,011	None
81	WATER_MAG_00005	M00047	Creatine pathway	Pathway modules	Amino acid metabolism	Arginine and proline metabolism	K00613 K00542 K00933	0.333333333	FALSE	K00613	8660	None
82	WATER_MAG_00005	M00133	Polyamine biosynthesis, arginine => agmatine => putrescine => spermidine	Pathway modules	Amino acid metabolism	Polyamine biosynthesis	(K01583,K01584,K01585,K02626) K01480 K01611 K00797	0.5	FALSE	K01611,K01480	514,301,430	None
83	WATER_MAG_00005	M00026	Histidine biosynthesis, PRPP => histidine	Pathway modules	Amino acid metabolism	Histidine metabolism	(K00765-K02502) (K01523 K01496,K11755,K14152) (K01814,K24017) (K02501+K02500,K01663) ((K01693 K00817 (K04486,K05602,K18649)),(K01089 K00817)) (K00013,K14152)	0.25	FALSE	K00765,K01496	2,509,334,548	None
84	WATER_MAG_00005	M00022	Shikimate pathway, phosphoenolpyruvate + erythrose-4P => chorismate	Pathway modules	Amino acid metabolism	Aromatic amino acid metabolism	(K01626,K03856,K13853) (((K01735,K13829) ((K03785,K03786) K00014,K13832)),K13830) ((K00891,K13829) (K00800,K24018),K13830) K01736	0.714285714	FALSE	K01735,K01626,K03786,K00891,K01736	3,569,934,257,569,480,000,000,000,000	None
85	WATER_MAG_00005	M00063	CMP-KDO biosynthesis	Pathway modules	Glycan metabolism	Lipopolysaccharide metabolism	K06041 K01627 K03270 K00979	0.25	FALSE	K01627	18525	None
86	WATER_MAG_00005	M00125	Riboflavin biosynthesis, plants and bacteria, GTP => riboflavin/FMN/FAD	Pathway modules	Metabolism of cofactors and vitamins	Cofactor and vitamin metabolism	(K01497,K14652) (K01498 K00082,K11752) (K22912,K20860,K20861,K20862,K21063,K21064) (K02858,K14652) K00794 K00793 (K20884 K22949,K11753)	0.142857143	FALSE	K11753	35587	None
87	WATER_MAG_00005	M00124	Pyridoxal-P biosynthesis, erythrose-4P => pyridoxal-P	Pathway modules	Metabolism of cofactors and vitamins	Cofactor and vitamin metabolism	K03472 K03473 K00831 K00097 K03474 K00275	0.166666667	FALSE	K00275	4,642,758,886	None
88	WATER_MAG_00005	M00119	Pantothenate biosynthesis, valine/L-aspartate => pantothenate	Pathway modules	Metabolism of cofactors and vitamins	Cofactor and vitamin metabolism	K00826 K00606 K00077 K01579 (K01918,K13799)	0.4	FALSE	K00606,K00077	4,164,545,811	None
89	WATER_MAG_00005	M00913	Pantothenate biosynthesis, 2-oxoisovalerate/spermine => pantothenate	Pathway modules	Metabolism of cofactors and vitamins	Cofactor and vitamin metabolism	K00606 K00077 K13367 K00128 K01918	0.4	FALSE	K00606,K00077	4,164,545,811	None
90	WATER_MAG_00005	M00120	Coenzyme A biosynthesis, pantothenate => CoA	Pathway modules	Metabolism of cofactors and vitamins	Cofactor and vitamin metabolism	(K00867,K03525,K01947,K09680) ((K01922,K21977) K01598,K13038) (K02318,(K00954,K02201) K00859)	0.666666667	FALSE	K13038,K03525	4,351,614,771	None
91	WATER_MAG_00005	M00914	Coenzyme A biosynthesis, archaea, 2-oxoisovalerate => 4-phosphopantoate => CoA	Pathway modules	Metabolism of cofactors and vitamins	Cofactor and vitamin metabolism	K00606 K00077 K06982 K09722 K13038 K02201 K09735	0.428571429	FALSE	K13038,K00606,K00077	435,164,164,545,811	None
92	WATER_MAG_00005	M00126	Tetrahydrofolate biosynthesis, GTP => THF	Pathway modules	Metabolism of cofactors and vitamins	Cofactor and vitamin metabolism	(K01495,K09007,K22391) (K01077,K01113,(K08310,K19965)) ((K13939,(K13940,K01633 K00950) K00796),(K01633 K13941)) (K11754,K20457) (K00287,K13998)	0.333333333	FALSE	K00796,K01495	211,024,836	None
93	WATER_MAG_00005	M00841	Tetrahydrofolate biosynthesis, mediated by PTPS, GTP => THF	Pathway modules	Metabolism of cofactors and vitamins	Cofactor and vitamin metabolism	K01495 K22101 K13941 K11754 K13998	0.2	FALSE	K01495	4836	None
94	WATER_MAG_00005	M00842	Tetrahydrobiopterin biosynthesis, GTP => BH4	Pathway modules	Metabolism of cofactors and vitamins	Cofactor and vitamin metabolism	K01495 K01737 K00072	0.333333333	FALSE	K01495	4836	None
95	WATER_MAG_00005	M00843	L-threo-Tetrahydrobiopterin biosynthesis, GTP => L-threo-BH4	Pathway modules	Metabolism of cofactors and vitamins	Cofactor and vitamin metabolism	K01495 K01737 K17745	0.333333333	FALSE	K01495	4836	None
96	WATER_MAG_00005	M00880	Molybdenum cofactor biosynthesis, GTP => molybdenum cofactor	Pathway modules	Metabolism of cofactors and vitamins	Cofactor and vitamin metabolism	((K03639 K03637),K20967) (K03635,K21142) (((K03831,K03638) K03750),K15376)	0.333333333	FALSE	K03635	60048	None
97	WATER_MAG_00005	M00140	C1-unit interconversion, prokaryotes	Pathway modules	Metabolism of cofactors and vitamins	Cofactor and vitamin metabolism	K00600 (K01491,(K00300 K01500)) K01938	1	TRUE	K01491,K00600,K01938	19,557,579,593,942,200,000,000	None
98	WATER_MAG_00005	M00141	C1-unit interconversion, eukaryotes	Pathway modules	Metabolism of cofactors and vitamins	Cofactor and vitamin metabolism	K00600 (K00288,(K13403 K13402))	0.5	FALSE	K00600	579,522,957	None
99	WATER_MAG_00005	M00846	Siroheme biosynthesis, glutamyl-tRNA => siroheme	Pathway modules	Metabolism of cofactors and vitamins	Cofactor and vitamin metabolism	K02492 K01845 K01698 K01749 (K01719,K13542,K13543) (K02302,(K00589,K02303,K02496,K13542,K13543)+K02304-K03794)	0.5	FALSE	K01749,K01698,K01719	585,005,979,658,499	None
100	WATER_MAG_00005	M00868	Heme biosynthesis, animals and fungi, glycine => heme	Pathway modules	Metabolism of cofactors and vitamins	Cofactor and vitamin metabolism	K00643 K01698 K01749 K01719 K01599 K00228 K00231 K01772	0.5	FALSE	K01749,K01698,K01719,K00228	58,500,597,965,849,900,000	None
101	WATER_MAG_00005	M00121	Heme biosynthesis, plants and bacteria, glutamate => heme	Pathway modules	Metabolism of cofactors and vitamins	Cofactor and vitamin metabolism	K01885 K02492 K01845 K01698 K01749 (K01719,K13542,K13543) K01599 (K00228,K02495) (K00230,K00231,K08973) K01772	0.4	FALSE	K01749,K01698,K01719,K00228	58,500,597,965,849,900,000	None
102	WATER_MAG_00005	M00926	Heme biosynthesis, bacteria, glutamyl-tRNA => coproporphyrin III => heme	Pathway modules	Metabolism of cofactors and vitamins	Cofactor and vitamin metabolism	K02492 K01845 K01698 K01749 (K01719,K13542) K01599 K00231 K01772 K00435	0.333333333	FALSE	K01749,K01698,K01719	585,005,979,658,499	None
103	WATER_MAG_00005	M00925	Cobalamin biosynthesis, aerobic, uroporphyrinogen III => precorrin 2 => cobyrinate a,c-diamide	Pathway modules	Metabolism of cofactors and vitamins	Cofactor and vitamin metabolism	(K02303,K13542) (K03394,K13540) K02229 (K05934,K13540,K13541) K05936 K02228 K05895 K00595 K06042 K02224 K02230+K09882+K09883	0.060606061	FALSE	K09883,K09882	4,340,312,342	None
104	WATER_MAG_00005	M00117	Ubiquinone biosynthesis, prokaryotes, chorismate (+ polyprenyl-PP) => ubiquinol	Pathway modules	Metabolism of cofactors and vitamins	Cofactor and vitamin metabolism	(K03181,K18240) K03179 (K03182+K03186) K18800 K00568 K03185 K03183 K03184 K00568	0.111111111	FALSE	K03183	49223	None
105	WATER_MAG_00005	M00128	Ubiquinone biosynthesis, eukaryotes, 4-hydroxybenzoate + polyprenyl-PP => ubiquinol	Pathway modules	Metabolism of cofactors and vitamins	Cofactor and vitamin metabolism	K06125 K06126 K00591 -- -- K06127 K06134 K00591	0.125	FALSE	K06134	20645	'--' steps are assumed incomplete
106	WATER_MAG_00005	M00116	Menaquinone biosynthesis, chorismate (+ polyprenyl-PP) => menaquinol	Pathway modules	Metabolism of cofactors and vitamins	Cofactor and vitamin metabolism	K02552 K02551 K08680 K02549 K01911 K01661 K19222 K02548 K03183	0.111111111	FALSE	K03183	49223	None
107	WATER_MAG_00005	M00095	C5 isoprenoid biosynthesis, mevalonate pathway	Pathway modules	Biosynthesis of terpenoids and polyketides	Terpenoid backbone biosynthesis	K00626 K01641 K00021 K00869 (K00938,K13273) K01597 K01823	0.142857143	FALSE	K00626	557,055,222	None
108	WATER_MAG_00005	M00849	C5 isoprenoid biosynthesis, mevalonate pathway, archaea	Pathway modules	Biosynthesis of terpenoids and polyketides	Terpenoid backbone biosynthesis	K00626 K01641 (K00021,K00054) ((K00869 K17942),(K18689 K18690 K22813)) K06981 K01823	0.142857143	FALSE	K00626	557,055,222	None
109	WATER_MAG_00005	M00096	C5 isoprenoid biosynthesis, non-mevalonate pathway	Pathway modules	Biosynthesis of terpenoids and polyketides	Terpenoid backbone biosynthesis	K01662 K00099 (K00991,K12506) K00919 (K01770,K12506) K03526 K03527 K01823	0.5	FALSE	K01662,K03527,K00919,K01770	57,051,381,333,865,100,000,000	None
110	WATER_MAG_00005	M00097	beta-Carotene biosynthesis, GGAP => beta-carotene	Pathway modules	Biosynthesis of terpenoids and polyketides	Plant terpenoid biosynthesis	K02291 K02293 K15744 K00514 K09835 K06443	0.166666667	FALSE	K02291	16600	None
111	WATER_MAG_00005	M00611	Oxygenic photosynthesis in plants and cyanobacteria	Signature modules	Module set	Metabolic capacity	(M00161,M00163) M00165	0.227272727	FALSE	K00134,K01601,K00615,K01808	39,396,480,748,664,100,000,000,000,000	No KOfam profile for M00161,No KOfam profile for M00163,No KOfam profile for M00165
112	WATER_MAG_00005	M00612	Anoxygenic photosynthesis in purple bacteria	Signature modules	Module set	Metabolic capacity	M00597 M00165	0.227272727	FALSE	K00134,K01601,K00615,K01808	39,396,480,748,664,100,000,000,000,000	No KOfam profile for M00165,No KOfam profile for M00597
113	WATER_MAG_00005	M00613	Anoxygenic photosynthesis in green nonsulfur bacteria	Signature modules	Module set	Metabolic capacity	M00597 M00376	0.03525641	FALSE	K00239,K00240,K00242,K02160	439,163,602,636,027,000,000,000,000,000	No KOfam profile for M00597,No KOfam profile for M00376
114	WATER_MAG_00005	M00614	Anoxygenic photosynthesis in green sulfur bacteria	Signature modules	Module set	Metabolic capacity	M00598 M00173	0.25	FALSE	K00024,K00239,K01006,K00031,K01902,K01595,K00240,K00242	63,630,439,161,740,200,000,000,000,000,000,000,000,000,000,000,000	No KOfam profile for M00598,No KOfam profile for M00173
115	WATER_MAG_00005	M00617	Methanogen	Signature modules	Module set	Metabolic capacity	M00567,M00357,M00356,M00563	0.2	FALSE	K01895	16,333,745,911,471	None
116	WATER_MAG_00005	M00618	Acetogen	Signature modules	Module set	Metabolic capacity	M00377 M00579	0.142857143	FALSE	K01491,K01938	19,557,939,426,598	No KOfam profile for M00377,No KOfam profile for M00579
0	WATER_Bin_00013	M00001	Glycolysis (Embden-Meyerhof pathway), glucose => pyruvate	Pathway modules	Carbohydrate metabolism	Central carbohydrate metabolism	(K00844,K12407,K00845,K00886,K08074,K00918) (K01810,K06859,K13810,K15916) (K00850,K16370,K21071,K00918) (K01623,K01624,K11645,K16305,K16306) K01803 ((K00134,K00150) K00927,K11389) (K01834,K15633,K15634,K15635) K01689 (K00873,K12406)	0.8	TRUE	K01689,K01803,K00850,K01810,K00134,K15633,K01624,K00927	11,893,210,742,275,900,000,000,000,000,000,000,000,000,000,000,000,000,000,000,000,000,000,000,000,000	None
1	WATER_Bin_00013	M00002	Glycolysis, core module involving three-carbon compounds	Pathway modules	Carbohydrate metabolism	Central carbohydrate metabolism	K01803 ((K00134,K00150) K00927,K11389) (K01834,K15633,K15634,K15635) K01689 (K00873,K12406)	0.833333333	TRUE	K01689,K01803,K00134,K15633,K00927	11,893,210,742,275,900,000,000,000,000,000,000,000,000,000,000,000	None
2	WATER_Bin_00013	M00003	Gluconeogenesis, oxaloacetate => fructose-6P	Pathway modules	Carbohydrate metabolism	Central carbohydrate metabolism	(K01596,K01610) K01689 (K01834,K15633,K15634,K15635) K00927 (K00134,K00150) K01803 ((K01623,K01624,K11645) (K03841,K02446,K11532,K01086,K04041),K01622)	1	TRUE	K01689,K03841,K01803,K00134,K01610,K15633,K01624,K00927	11,893,210,743,018,400,000,000,000,000,000,000,000,000,000,000,000,000,000,000,000,000,000,000,000,000,000	None
3	WATER_Bin_00013	M00307	Pyruvate oxidation, pyruvate => acetyl-CoA	Pathway modules	Carbohydrate metabolism	Central carbohydrate metabolism	((K00163,K00161+K00162)+K00627+K00382-K13997),K00169+K00170+K00171+(K00172,K00189),K03737	1	TRUE	K00163,K03737,K00382	90,228,777,142,309,800,000,000,000,000,000	None
4	WATER_Bin_00013	M00009	Citrate cycle (TCA cycle, Krebs cycle)	Pathway modules	Carbohydrate metabolism	Central carbohydrate metabolism	(K01647,K05942) (K01681,K01682) (K00031,K00030) (K00164+K00658+K00382,K00174+K00175-K00177-K00176) (K01902+K01903,K01899+K01900,K18118) (K00234+K00235+K00236+K00237,K00239+K00240+K00241-(K00242,K18859,K18860),K00244+K00245+K00246-K00247) (K01676,K01679,K01677+K01678) (K00026,K00025,K00024,K00116)	0.708333333	FALSE	K00242,K00240,K00241,K01647,K01682,K00024,K01676,K00116,K00382,K00164,K00658	723,924,669,723,872,000,000,000,000,000,000,000,000,000,000,000,000,000,000,000,000,000,000,000	None
5	WATER_Bin_00013	M00010	Citrate cycle, first carbon oxidation, oxaloacetate => 2-oxoglutarate	Pathway modules	Carbohydrate metabolism	Central carbohydrate metabolism	(K01647,K05942) (K01681,K01682) (K00031,K00030)	0.666666667	FALSE	K01647,K01682	7,237,192,403,409,030,000	None
6	WATER_Bin_00013	M00011	Citrate cycle, second carbon oxidation, 2-oxoglutarate => oxaloacetate	Pathway modules	Carbohydrate metabolism	Central carbohydrate metabolism	(K00164+K00658+K00382,K00174+K00175-K00177-K00176) (K01902+K01903,K01899+K01900,K18118) (K00234+K00235+K00236+K00237,K00239+K00240+K00241-(K00242,K18859,K18860),K00244+K00245+K00246-K00247) (K01676,K01679,K01677+K01678) (K00026,K00025,K00024,K00116)	0.733333333	FALSE	K00242,K00240,K00241,K00024,K01676,K00116,K00382,K00164,K00658	72,392,466,972,385,800,000,000,000,000,000,000,000,000,000,000,000,000	None
7	WATER_Bin_00013	M00004	Pentose phosphate pathway (Pentose phosphate cycle)	Pathway modules	Carbohydrate metabolism	Central carbohydrate metabolism	(K13937,((K00036,K19243) (K01057,K07404))) K00033 K01783 (K01807,K01808) K00615 K00616 (K01810,K06859,K13810,K15916)	0.75	TRUE	K00615,K01807,K01810,K00033,K01057,K00616	2,647,214,101,330,630,000,000,000,000,000,000,000,000,000,000,000,000,000,000,000,000	None
8	WATER_Bin_00013	M00006	Pentose phosphate pathway, oxidative phase, glucose 6P => ribulose 5P	Pathway modules	Carbohydrate metabolism	Central carbohydrate metabolism	(K13937,((K00036,K19243) (K01057,K07404))) K00033	0.666666667	FALSE	K00033,K01057	5,456,452,851	None
9	WATER_Bin_00013	M00007	Pentose phosphate pathway, non-oxidative phase, fructose 6P => ribose 5P	Pathway modules	Carbohydrate metabolism	Central carbohydrate metabolism	K00615 (K00616,K13810) K01783 (K01807,K01808)	0.75	TRUE	K00615,K01807,K00616	26,472,141,013,306,300,000,000,000,000,000,000	None
10	WATER_Bin_00013	M00580	Pentose phosphate pathway, archaea, fructose 6P => ribose 5P	Pathway modules	Carbohydrate metabolism	Central carbohydrate metabolism	(K08094 (K08093,K13812),K13831) K01807	0.5	FALSE	K01807	330,635,502,359,902	None
11	WATER_Bin_00013	M00005	PRPP biosynthesis, ribose 5P => PRPP	Pathway modules	Carbohydrate metabolism	Central carbohydrate metabolism	K00948	1	TRUE	K00948	1,380,342,705	None
12	WATER_Bin_00013	M00008	Entner-Doudoroff pathway, glucose-6P => glyceraldehyde-3P + pyruvate	Pathway modules	Carbohydrate metabolism	Central carbohydrate metabolism	K00036 (K01057,K07404) K01690 K01625	0.25	FALSE	K01057	52851	None
13	WATER_Bin_00013	M00308	Semi-phosphorylative Entner-Doudoroff pathway, gluconate => glycerate-3P	Pathway modules	Carbohydrate metabolism	Central carbohydrate metabolism	K05308 K00874 K01625 (K00134 K00927,K00131,K18978)	0.4	FALSE	K00134,K00927	602,495,740,110,477	None
14	WATER_Bin_00013	M00552	D-galactonate degradation, De Ley-Doudoroff pathway, D-galactonate => glycerate-3P	Pathway modules	Carbohydrate metabolism	Other carbohydrate metabolism	K01684 K00883 K01631 K00134 K00927	0.6	FALSE	K00134,K01684,K00927	6,024,933,601,574,010,000,000,000	None
15	WATER_Bin_00013	M00855	Glycogen degradation, glycogen => glucose-6P	Pathway modules	Carbohydrate metabolism	Other carbohydrate metabolism	(K00688,K16153) (K01196,((K00705,K22451) (K02438,K01200))) (K15779,K01835,K15778)	0.333333333	FALSE	K01835	11679	None
16	WATER_Bin_00013	M00549	Nucleotide sugar biosynthesis, glucose => UDP-glucose	Pathway modules	Carbohydrate metabolism	Other carbohydrate metabolism	(K00844,K00845,K12407,K00886) (K01835,K15779,K15778) (K00963,K12447)	0.333333333	FALSE	K01835	11679	None
17	WATER_Bin_00013	M00892	UDP-N-acetyl-D-glucosamine biosynthesis, eukaryotes, glucose => UDP-GlcNAc	Pathway modules	Carbohydrate metabolism	Other carbohydrate metabolism	(K00844,K12407,K00845) K01810 K00820 K00621 K01836 K00972	0.333333333	FALSE	K01810,K00820	127,445,677,857,989,000,000,000	None
18	WATER_Bin_00013	M00909	UDP-N-acetyl-D-glucosamine biosynthesis, prokaryotes, glucose => UDP-GlcNAc	Pathway modules	Carbohydrate metabolism	Other carbohydrate metabolism	K00845 (K01810,K13810,K15916) K00820 K03431 K04042	0.8	TRUE	K04042,K01810,K03431,K00820	254,721,274,456,778,000,000,000,000,000,000	None
19	WATER_Bin_00013	M00012	Glyoxylate cycle	Pathway modules	Carbohydrate metabolism	Other carbohydrate metabolism	K01647 (K01681,K01682) K01637 (K01638,K19282) (K00026,K00025,K00024)	1	TRUE	K01647,K01682,K01638,K00024,K01637	723,719,240,337,473,000,000,000,000,000,000,000,000	None
20	WATER_Bin_00013	M00373	Ethylmalonyl pathway	Pathway modules	Carbohydrate metabolism	Other carbohydrate metabolism	K00626 K00023 K17865 K14446 K14447 K14448 K14449 K08691 K14451 K01965+K01966 K05606 K01847	0.166666667	FALSE	K00626,K17865	157,213,205,347,317	None
21	WATER_Bin_00013	M00740	Methylaspartate cycle	Pathway modules	Carbohydrate metabolism	Other carbohydrate metabolism	K01647 K01681 K00031 K00261 K19268+K01846 K04835 K19280 K14449 K19281 K19282 K00024	0.181818182	FALSE	K01647,K00024	7,237,582,283,409,030,000	None
22	WATER_Bin_00013	M00532	Photorespiration	Pathway modules	Carbohydrate metabolism	Other carbohydrate metabolism	(K01601-K01602) K19269 K11517 K03781 K14272 K00600 K00830 (K15893,K15919) K15918 K00281+K00605+K00382+K02437	0.4	FALSE	K02437,K00605,K00281,K01601,K00600,K15918,K00382	706,915,906,121,324,000,000,000,000,000,000,000,000,000,000,000,000,000	None
23	WATER_Bin_00013	M00131	Inositol phosphate metabolism, Ins(1,3,4,5)P4 => Ins(1,3,4)P3 => myo-inositol	Pathway modules	Carbohydrate metabolism	Other carbohydrate metabolism	K01106 K01107 K01109 K01092	0.25	FALSE	K01092	29185	None
24	WATER_Bin_00013	M00165	Reductive pentose phosphate cycle (Calvin cycle)	Pathway modules	Energy metabolism	Carbon fixation	K00855 (K01601-K01602) K00927 (K05298,K00150,K00134) (K01623,K01624) (K03841,K02446,K11532,K01086) K00615 (K01623,K01624) (K01100,K11532,K01086) K00615 (K01807,K01808)	0.909090909	TRUE	K03841,K00615,K00855,K01807,K00134,K01601,K01624,K00927	301,842,647,214,101,000,000,000,000,000,000,000,000,000,000,000,000,000,000,000,000,000,000,000,000	No KOfam profile for M00165
25	WATER_Bin_00013	M00166	Reductive pentose phosphate cycle, ribulose-5P => glyceraldehyde-3P	Pathway modules	Energy metabolism	Carbon fixation	K00855 (K01601-K01602) K00927 (K05298,K00150,K00134)	1	TRUE	K00855,K00134,K01601,K00927	2,647,160,249,391,520,000,000,000	None
26	WATER_Bin_00013	M00167	Reductive pentose phosphate cycle, glyceraldehyde-3P => ribulose-5P	Pathway modules	Energy metabolism	Carbon fixation	(K01623,K01624) (K03841,K02446,K11532,K01086) K00615 (K01623,K01624) (K01100,K11532,K01086) K00615 (K01807,K01808)	0.857142857	TRUE	K03841,K00615,K01807,K01624	30,184,264,721,410,100,000,000,000,000,000,000,000,000,000,000,000	None
27	WATER_Bin_00013	M00168	CAM (Crassulacean acid metabolism), dark	Pathway modules	Energy metabolism	Carbon fixation	K01595 (K00025,K00026,K00024)	1	TRUE	K01595,K00024	2,960,296,158,228	None
28	WATER_Bin_00013	M00172	C4-dicarboxylic acid cycle, NADP - malic enzyme type	Pathway modules	Energy metabolism	Carbon fixation	K01595 K00051 K00029 K01006	0.25	FALSE	K01595	29,602,961	None
29	WATER_Bin_00013	M00171	C4-dicarboxylic acid cycle, NAD - malic enzyme type	Pathway modules	Energy metabolism	Carbon fixation	K01595 K14454 K14455 (K00025,K00026) K00028 (K00814,K14272) K01006	0.142857143	FALSE	K01595	29,602,961	None
30	WATER_Bin_00013	M00170	C4-dicarboxylic acid cycle, phosphoenolpyruvate carboxykinase type	Pathway modules	Energy metabolism	Carbon fixation	K01595 K14454 K14455 K01610	0.5	FALSE	K01595,K01610	296,029,614,384,549,000	None
31	WATER_Bin_00013	M00173	Reductive citrate cycle (Arnon-Buchanan cycle)	Pathway modules	Energy metabolism	Carbon fixation	(K00169+K00170+K00171+K00172,K03737) ((K01007,K01006) K01595,K01959+K01960,K01958) K00024 (K01676,K01679,K01677+K01678) (K00239+K00240-K00241-K00242,K00244+K00245-K00246-K00247,K18556+K18557+K18558+K18559+K18560) (K01902+K01903) (K00174+K00175-K00177-K00176) K00031 (K01681,K01682) (K15230+K15231,K15232+K15233 K15234)	0.5	FALSE	K00242,K00240,K00241,K03737,K01682,K01595,K00024,K01676	723,924,669,723,814,000,000,000,000,000,000,000,000,000,000	No KOfam profile for M00173
32	WATER_Bin_00013	M00376	3-Hydroxypropionate bi-cycle	Pathway modules	Energy metabolism	Carbon fixation	(K02160+K01961+K01962+K01963) K14468 K14469 K15052 K05606 (K01847,K01848+K01849) (K14471+K14472) (K00239+K00240+K00241) K01679 K08691 K14449 K14470 K09709	0.108974359	FALSE	K00240,K00241,K02160,K01962,K01963	2,466,972,386,077,040,000,000,000,000,000,000	No KOfam profile for M00376
33	WATER_Bin_00013	M00375	Hydroxypropionate-hydroxybutylate cycle	Pathway modules	Energy metabolism	Carbon fixation	(K01964+K15037+K15036) K15017 K15039 K15018 K15019 K15020 K05606 (K01848+K01849) (K15038,K15017) K14465 (K14466,K18861) K14534 K15016 K00626	0.071428571	FALSE	K00626	1,572,132,053	None
34	WATER_Bin_00013	M00374	Dicarboxylate-hydroxybutyrate cycle	Pathway modules	Energy metabolism	Carbon fixation	(K00169+K00170+K00171+K00172) K01007 K01595 K00024 (K01677+K01678) (K00239+K00240-K00241-K18860) (K01902+K01903) (K15038,K15017) K14465 (K14467,K18861) K14534 K15016 K00626	0.269230769	FALSE	K00240,K00241,K01595,K00024,K00626	24,669,723,829,602,900,000,000,000,000,000	None
35	WATER_Bin_00013	M00620	Incomplete reductive citrate cycle, acetyl-CoA => oxoglutarate	Pathway modules	Energy metabolism	Carbon fixation	(K00169+K00170+K00171+K00172) (K01959+K01960) K00024 (K01677+K01678) (K18209+K18210) (K01902+K01903) (K00174+K00175+K00176+K00177)	0.142857143	FALSE	K00024	58228	None
36	WATER_Bin_00013	M00567	Methanogenesis, CO2 => methane	Pathway modules	Energy metabolism	Methane metabolism	(K00200+K00201+K00202+K00203-K11261+(K00205,K11260,K00204)) K00672 K01499 (K00319,K13942) K00320 (K00577+K00578+K00579+K00580+K00581-K00582-K00583+K00584) (K00399+K00401+K00402) (K22480+K22481+K22482,K03388+K03389+K03390,K08264+K08265,K03388+K03389+K03390+K14127+(K14126+K14128,K22516+K00125))	0.025	FALSE	K00202	2,708,542,977	None
37	WATER_Bin_00013	M00346	Formaldehyde assimilation, serine pathway	Pathway modules	Energy metabolism	Methane metabolism	K00600 K00830 K00018 K11529 K01689 K01595 K00024 K08692+K14067 K08691	0.444444444	FALSE	K01689,K01595,K00024,K00600	1,189,321,074,296,020,000,000,000,000	None
38	WATER_Bin_00013	M00345	Formaldehyde assimilation, ribulose monophosphate pathway	Pathway modules	Energy metabolism	Methane metabolism	(((K08093,K13812) K08094),K13831) (K00850,K16370) K01624	0.666666667	FALSE	K00850,K01624	36,657,402	None
39	WATER_Bin_00013	M00344	Formaldehyde assimilation, xylulose monophosphate pathway	Pathway modules	Energy metabolism	Methane metabolism	K17100 K00863 K01624 K03841	0.5	FALSE	K03841,K01624	30,184,433,565,740,200,000	None
40	WATER_Bin_00013	M00935	Methanofuran biosynthesis	Pathway modules	Energy metabolism	Methane metabolism	K09733 K19793 K07144 K18933 K06914 K07072	0.166666667	FALSE	K18933	58234	None
41	WATER_Bin_00013	M00530	Dissimilatory nitrate reduction, nitrate => ammonia	Pathway modules	Energy metabolism	Nitrogen metabolism	(K00370+K00371+K00374,K02567+K02568) (K00362+K00363,K03385+K15876)	1	TRUE	K00374,K00362,K00363,K00370,K00371	73,502,841,728,418,100,000,000,000,000,000,000	None
42	WATER_Bin_00013	M00529	Denitrification, nitrate => nitrogen	Pathway modules	Energy metabolism	Nitrogen metabolism	(K00370+K00371+K00374,K02567+K02568) (K00368,K15864) (K04561+K02305) K00376	0.25	FALSE	K00374,K00370,K00371	7,350,196,254,575,640,000,000,000	None
43	WATER_Bin_00013	M00804	Complete nitrification, comammox, ammonia => nitrite => nitrate	Pathway modules	Energy metabolism	Nitrogen metabolism	K10944+K10945+K10946 K10535 K00370+K00371	0.333333333	FALSE	K00370,K00371	196,254,575,644,731,000,000	None
44	WATER_Bin_00013	M00176	Assimilatory sulfate reduction, sulfate => H2S	Pathway modules	Energy metabolism	Sulfur metabolism	(K13811,K00958+K00860,K00955+K00957,K00956+K00957+K00860) K00390 (K00380+K00381,K00392)	0.333333333	FALSE	K00957,K00381	5,287,359,883	No KOfam profile for M00176
45	WATER_Bin_00013	M00596	Dissimilatory sulfate reduction, sulfate => H2S	Pathway modules	Energy metabolism	Sulfur metabolism	K00958 (K00394+K00395) (K11180+K11181)	0.333333333	FALSE	K11180,K00394	1,090,735,433	None
46	WATER_Bin_00013	M00595	Thiosulfate oxidation by SOX complex, thiosulfate => sulfate	Pathway modules	Energy metabolism	Sulfur metabolism	K17222+K17223+K17224-K17225-K22622+K17226+K17227	1	TRUE	K22622,K17226,K17227,K17223,K17222,K17225,K17224	288,551,070,928,853,000,000,000,000,000,000,000,000,000,000,000,000,000,000,000,000,000,000	None
47	WATER_Bin_00013	M00144	NADH:quinone oxidoreductase, prokaryotes	Pathway modules	Energy metabolism	ATP synthesis	K00330+(K00331+K00332+K00333,K00331+K13378,K13380)+K00334+K00335+K00336+K00337+K00338+K00339+K00340+(K00341+K00342)+K00343	0.214285714	FALSE	K00334,K00332,K00333	42,106,645,514,423,300,000	None
48	WATER_Bin_00013	M00149	Succinate dehydrogenase, prokaryotes	Pathway modules	Energy metabolism	ATP synthesis	K00241+(K00242,K18859,K18860)+K00239+K00240	0.75	TRUE	K00242,K00240,K00241	7,239,246,697,238	None
49	WATER_Bin_00013	M00151	Cytochrome bc1 complex respiratory unit	Pathway modules	Energy metabolism	ATP synthesis	((K00412+K00413,K00410)+K00411),K03886+K03887+K03888,K03890+K03891+K03889	1	TRUE	K00413,K00412,K00411	2,408,322,566,225,670,000,000,000,000,000,000,000,000	None
50	WATER_Bin_00013	M00152	Cytochrome bc1 complex	Pathway modules	Energy metabolism	ATP synthesis	K00411+K00412+K00413+K00414+K00415+K00416+K00417+K00418+K00419+K00420	0.3	FALSE	K00413,K00412,K00411	2,408,322,566,225,670,000,000,000,000,000,000,000,000	None
51	WATER_Bin_00013	M00154	Cytochrome c oxidase	Pathway modules	Energy metabolism	ATP synthesis	(K02257+K02262+K02256+K02261+K02263+K02264+K02265+K02266+K02267+K02268+K02270-K02271+K02272-K02273+K02258+K02259+K02260)	0.133333333	FALSE	K02258,K02259	124,681,134	None
52	WATER_Bin_00013	M00155	Cytochrome c oxidase, prokaryotes	Pathway modules	Energy metabolism	ATP synthesis	K02275+(K02274+K02276,K15408)-K02277	0.5	FALSE	K02275	34789	None
53	WATER_Bin_00013	M00153	Cytochrome bd ubiquinol oxidase	Pathway modules	Energy metabolism	ATP synthesis	K00425+K00426+(K00424,K22501)	0.666666667	FALSE	K00426,K00425	420,264,202,747,248	None
54	WATER_Bin_00013	M00156	Cytochrome c oxidase, cbb3-type	Pathway modules	Energy metabolism	ATP synthesis	((K00404+K00405,K15862)+K00407+K00406)	0.75	TRUE	K00406,K00405,K00404	2,840,312,492,124,930,000,000,000	None
55	WATER_Bin_00013	M00157	F-type ATPase, prokaryotes and chloroplasts	Pathway modules	Energy metabolism	ATP synthesis	K02111+K02112+K02113+K02114+K02115+K02108+K02109+K02110	1	TRUE	K02109,K02108,K02111,K02112,K02113,K02114,K02115,K02110	2,546,425,462,247,160,000,000,000,000,000,000,000,000,000,000,000,000,000,000,000,000,000,000	None
56	WATER_Bin_00013	M00082	Fatty acid biosynthesis, initiation	Pathway modules	Lipid metabolism	Fatty acid metabolism	(K11262,(K02160+K01961,K11263)+(K01962+K01963,K18472)) (K00665,K00667+K00668,K11533,(K00645 (K00648,K18473)))	0.375	FALSE	K02160,K01962,K01963	6,077,044,380,487,130,000,000,000	None
57	WATER_Bin_00013	M00083	Fatty acid biosynthesis, elongation	Pathway modules	Lipid metabolism	Fatty acid metabolism	K00665,(K00667 K00668),K11533,((K00647,K09458) K00059 (K02372,K01716,K16363) (K00208,K02371,K10780,K00209))	1	TRUE	K09458,K01716,K00647,K00209,K02372,K00059	41,101,929,151,231,400,000,000,000,000,000,000,000	None
58	WATER_Bin_00013	M00873	Fatty acid biosynthesis in mitochondria, animals	Pathway modules	Lipid metabolism	Fatty acid metabolism	K18660 K03955+K00645 K09458 K11539+K13370 K22540 K07512	0.166666667	FALSE	K09458	4110	None
59	WATER_Bin_00013	M00874	Fatty acid biosynthesis in mitochondria, fungi	Pathway modules	Lipid metabolism	Fatty acid metabolism	K11262 K03955+K00645 K09458 K00059 K22541 K07512	0.333333333	FALSE	K09458,K00059	41,104,112	None
60	WATER_Bin_00013	M00086	beta-Oxidation, acyl-CoA synthesis	Pathway modules	Lipid metabolism	Fatty acid metabolism	K01897,K15013	1	TRUE	K01897	48708	None
61	WATER_Bin_00013	M00087	beta-Oxidation	Pathway modules	Lipid metabolism	Fatty acid metabolism	(K00232,K00249,K00255,K06445,K09479) (((K01692,K07511,K13767) (K00022,K07516)),K01825,K01782,K07514,K07515,K10527) (K00632,K07508,K07509,K07513)	0.333333333	FALSE	K00249	1,240,530,361	None
62	WATER_Bin_00013	M00104	Bile acid biosynthesis, cholesterol => cholate/chenodeoxycholate	Pathway modules	Lipid metabolism	Sterol biosynthesis	K00489 K12408 K07431 K00251 K00037 K00488 K08748 K01796 K10214 K12405 K08764 K11992	0.083333333	FALSE	K01796	12406	None
63	WATER_Bin_00013	M00088	Ketone body biosynthesis, acetyl-CoA => acetoacetate/3-hydroxybutyrate/acetone	Pathway modules	Lipid metabolism	Lipid metabolism	K00626 K01641 K01640 K00019 K01574	0.6	FALSE	K01640,K01641,K00626	2,702,017,295,576,400,000,000,000,000,000,000,000,000	None
64	WATER_Bin_00013	M00089	Triacylglycerol biosynthesis	Pathway modules	Lipid metabolism	Lipid metabolism	(K00629,K13506,K13507,K00630,K13508) (K00655,K13509,K13523,K19007,K13513,K13517,K13519,K14674,K22831) (K01080,K15728,K18693) (K11155,K11160,K14456,K22848,K22849)	0.25	FALSE	K00655	9494	None
65	WATER_Bin_00013	M00093	Phosphatidylethanolamine (PE) biosynthesis, PA => PS => PE	Pathway modules	Lipid metabolism	Lipid metabolism	K00981 (K00998,K17103) K01613	0.666666667	FALSE	K17103,K00981	140,092,186,746,946	None
66	WATER_Bin_00013	M00048	Inosine monophosphate biosynthesis, PRPP + glutamine => IMP	Pathway modules	Nucleotide metabolism	Purine metabolism	K00764 (K01945,K11787,K11788,K13713) (K00601,K11175,K08289,K11787,K01492) (K01952,(K23269+K23264+K23265),(K23270+K23265)) (K01933,K11787,K11788 (K01587,K11808,K01589 K01588)) (K01923,K01587,K13713) K01756 (K00602,(K01492,K06863 K11176))	0.75	TRUE	K01952,K00602,K01756,K01945,K00764,K08289	2,657,520,317,103,080,000,000,000,000,000,000,000,000	None
67	WATER_Bin_00013	M00049	Adenine ribonucleotide biosynthesis, IMP => ADP,ATP	Pathway modules	Nucleotide metabolism	Purine metabolism	K01939 K01756 (K00939,K18532,K18533,K00944) (K00940,K00873,K12406)	0.75	TRUE	K00940,K01939,K01756	23,513,835,230,292,300,000,000,000,000	None
68	WATER_Bin_00013	M00050	Guanine ribonucleotide biosynthesis IMP => GDP,GTP	Pathway modules	Nucleotide metabolism	Purine metabolism	K00088 K01951 K00942 (K00940,K18533,K00873,K12406)	1	TRUE	K01951,K00940,K00088,K00942	18,904,235,138,352,300,000,000,000,000,000,000,000,000,000	None
69	WATER_Bin_00013	M00051	Uridine monophosphate biosynthesis, glutamine (+ PRPP) => UMP	Pathway modules	Nucleotide metabolism	Pyrimidine metabolism	(K11540,(K11541 K01465),((K01954,K01955+K01956) (K00609+K00610,K00608) K01465)) (K00226,K00254,K17828) (K13421,K00762 K01591)	0.583333333	FALSE	K01956,K01465,K00609,K00762,K01955	992,619,241,149,466,000,000,000,000,000,000,000,000	None
70	WATER_Bin_00013	M00052	Pyrimidine ribonucleotide biosynthesis, UMP => UDP/UTP,CDP/CTP	Pathway modules	Nucleotide metabolism	Pyrimidine metabolism	(K13800,K13809,K09903) (K00940,K18533) K01937	1	TRUE	K01937,K00940,K09903	118,942,351,383,523,000,000,000	None
71	WATER_Bin_00013	M00053	Pyrimidine deoxyribonuleotide biosynthesis, CDP/CTP => dCDP/dCTP,dTDP/dTTP	Pathway modules	Nucleotide metabolism	Pyrimidine metabolism	(K00524,K00525+K00526,K10807+K10808) (K00940,K18533) (K00527,K21636) K01494 K01520 (K00560,K13998) K00943 K00940	0.625	FALSE	K00525,K00526,K00940,K00560,K01494,K00524	1,772,918,645,281,720,000,000,000,000,000,000,000,000,000,000,000,000,000,000,000	None
72	WATER_Bin_00013	M00020	Serine biosynthesis, glycerate-3P => serine	Pathway modules	Amino acid metabolism	Serine and threonine metabolism	K00058 K00831 (K01079,K02203,K22305)	0.666666667	FALSE	K01079,K00831,K02203	162,531,676,523,694,000,000,000,000,000	None
73	WATER_Bin_00013	M00018	Threonine biosynthesis, aspartate => homoserine => threonine	Pathway modules	Amino acid metabolism	Serine and threonine metabolism	(K00928,K12524,K12525,K12526) K00133 (K00003,K12524,K12525) (K00872,K02204,K02203) K01733	0.4	FALSE	K01733,K02203,K02204	109,721,071,459,811	None
74	WATER_Bin_00013	M00555	Betaine biosynthesis, choline => betaine	Pathway modules	Amino acid metabolism	Serine and threonine metabolism	(K17755,((K00108,K11440,K00499) (K00130,K14085)))	0.5	FALSE	K00108	3,297,424,215	None
75	WATER_Bin_00013	M00919	Ectoine degradation, ectoine => aspartate	Pathway modules	Amino acid metabolism	Serine and threonine metabolism	K15783 K15784 K15785 K15786	0.25	FALSE	K15785	20290	None
76	WATER_Bin_00013	M00609	Cysteine biosynthesis, methionine => cysteine	Pathway modules	Amino acid metabolism	Cysteine and methionine metabolism	K00789 K17462 K01243 K07173 K17216 K17217	0.166666667	FALSE	K00789	16001	None
77	WATER_Bin_00013	M00017	Methionine biosynthesis, apartate => homoserine => methionine	Pathway modules	Amino acid metabolism	Cysteine and methionine metabolism	(K00928,K12524,K12525) K00133 (K00003,K12524,K12525) (K00651,K00641) K01739 (K01760,K14155) (K00548,K24042,K00549)	0.142857143	FALSE	K00548	5639	None
78	WATER_Bin_00013	M00034	Methionine salvage pathway	Pathway modules	Amino acid metabolism	Cysteine and methionine metabolism	K00789 K01611 K00797 ((K01243,K01244) K00899,K00772) K08963 (K16054,K08964 (K09880,K08965 K08966)) K08967 (K00815,K08969,K23977,K00832,K00838)	0.125	FALSE	K00789	16001	None
79	WATER_Bin_00013	M00035	Methionine degradation	Pathway modules	Amino acid metabolism	Cysteine and methionine metabolism	K00789 (K00558,K17398,K17399) K01251 (K01697,K10150)	0.25	FALSE	K00789	16001	None
80	WATER_Bin_00013	M00368	Ethylene biosynthesis, methionine => ethylene	Pathway modules	Amino acid metabolism	Cysteine and methionine metabolism	K00789 (K01762,K20772) K05933	0.333333333	FALSE	K00789	16001	None
81	WATER_Bin_00013	M00019	Valine/isoleucine biosynthesis, pyruvate => valine / 2-oxobutanoate => isoleucine	Pathway modules	Amino acid metabolism	Branched-chain amino acid metabolism	K01652+(K01653,K11258) K00053 K01687 K00826	1	TRUE	K01652,K01653,K00826,K00053,K01687	170,291,703,013,576,000,000,000,000,000,000,000,000,000,000,000,000,000,000,000	None
82	WATER_Bin_00013	M00535	Isoleucine biosynthesis, pyruvate => 2-oxobutanoate	Pathway modules	Amino acid metabolism	Branched-chain amino acid metabolism	K09011 K01703+K01704 K00052	0.166666667	FALSE	K01704	4,492,254,747	None
83	WATER_Bin_00013	M00570	Isoleucine biosynthesis, threonine => 2-oxobutanoate => isoleucine	Pathway modules	Amino acid metabolism	Branched-chain amino acid metabolism	(K17989,K01754) K01652+(K01653,K11258) K00053 K01687 K00826	1	TRUE	K01652,K01653,K00826,K01754,K00053,K01687	170,291,703,013,576,000,000,000,000,000,000,000,000,000,000,000,000,000,000,000,000,000,000,000,000	None
84	WATER_Bin_00013	M00432	Leucine biosynthesis, 2-oxoisovalerate => 2-oxoisocaproate	Pathway modules	Amino acid metabolism	Branched-chain amino acid metabolism	K01649 (K01702,K01703+K01704) K00052	0.166666667	FALSE	K01704	4,492,254,747	None
85	WATER_Bin_00013	M00036	Leucine degradation, leucine => acetoacetate + acetyl-CoA	Pathway modules	Amino acid metabolism	Branched-chain amino acid metabolism	K00826 ((K00166+K00167,K11381)+K09699+K00382) (K00253,K00249) (K01968+K01969) (K05607,K13766) K01640	0.555555556	FALSE	K01640,K00826,K00249,K00382	2,702,013,576,124,050,000,000,000,000,000,000,000,000	None
86	WATER_Bin_00013	M00016	Lysine biosynthesis, succinyl-DAP pathway, aspartate => lysine	Pathway modules	Amino acid metabolism	Lysine metabolism	(K00928,K12524,K12525,K12526) K00133 K01714 K00215 K00674 (K00821,K14267) K01439 K01778 (K01586,K12526)	0.555555556	FALSE	K01714,K00215,K00821,K01778,K01586	6,713,129,277,610,220,000,000,000,000,000,000,000,000,000,000	None
87	WATER_Bin_00013	M00525	Lysine biosynthesis, acetyl-DAP pathway, aspartate => lysine	Pathway modules	Amino acid metabolism	Lysine metabolism	K00928 K00133 K01714 K00215 K05822 K00841 K05823 K01778 K01586	0.444444444	FALSE	K01714,K00215,K01778,K01586	671,312,927,221,315,000,000,000,000,000,000,000,000,000	None
88	WATER_Bin_00013	M00526	Lysine biosynthesis, DAP dehydrogenase pathway, aspartate => lysine	Pathway modules	Amino acid metabolism	Lysine metabolism	(K00928,K12524,K12525,K12526) K00133 K01714 K00215 K03340 (K01586,K12526)	0.5	FALSE	K01714,K00215,K01586	67,131,292,743,964,500,000,000	None
89	WATER_Bin_00013	M00527	Lysine biosynthesis, DAP aminotransferase pathway, aspartate => lysine	Pathway modules	Amino acid metabolism	Lysine metabolism	(K00928,K12524,K12525,K12526) K00133 K01714 K00215 K10206 K01778 (K01586,K12526)	0.571428571	FALSE	K01714,K00215,K01778,K01586	671,312,927,221,315,000,000,000,000,000,000,000,000,000	None
90	WATER_Bin_00013	M00030	Lysine biosynthesis, AAA pathway, 2-oxoglutarate => 2-aminoadipate => lysine	Pathway modules	Amino acid metabolism	Lysine metabolism	K01655 K17450 K01705 K05824 K00838 K00143 (K00293,K24034) K00290	0.125	FALSE	K00290	42665	None
91	WATER_Bin_00013	M00032	Lysine degradation, lysine => saccharopine => acetoacetyl-CoA	Pathway modules	Amino acid metabolism	Lysine metabolism	K14157 K14085 K00825 (K15791+K00658+K00382) K00252 (K07514,(K07515,K07511) K00022)	0.111111111	FALSE	K00382,K00658	2,441,360,544	None
92	WATER_Bin_00013	M00028	Ornithine biosynthesis, glutamate => ornithine	Pathway modules	Amino acid metabolism	Arginine and proline metabolism	(K00618,K00619,K14681,K14682,K00620,K22477,K22478) ((K00930,K22478) K00145,K12659) (K00818,K00821) (K01438,K14677,K00620)	1	TRUE	K00145,K00821,K00930,K01438,K00620,K14682	29,181,761,017,671,600,000,000,000,000,000,000,000,000,000	None
93	WATER_Bin_00013	M00844	Arginine biosynthesis, ornithine => arginine	Pathway modules	Amino acid metabolism	Arginine and proline metabolism	K00611 K01940 (K01755,K14681)	1	TRUE	K01940,K00611,K01755	7,613,760,959,735,520,000,000	None
94	WATER_Bin_00013	M00845	Arginine biosynthesis, glutamate => acetylcitrulline => arginine	Pathway modules	Amino acid metabolism	Arginine and proline metabolism	K22478 K00145 K00821 K09065 K01438 K01940 K01755	0.714285714	FALSE	K01940,K00145,K00821,K01755,K01438	761,329,181,761,059,000,000,000,000,000,000,000,000,000	None
95	WATER_Bin_00013	M00029	Urea cycle	Pathway modules	Amino acid metabolism	Arginine and proline metabolism	K01948 K00611 K01940 (K01755,K14681) K01476	0.6	FALSE	K01940,K00611,K01755	7,613,760,959,735,520,000,000	None
96	WATER_Bin_00013	M00015	Proline biosynthesis, glutamate => proline	Pathway modules	Amino acid metabolism	Arginine and proline metabolism	((K00931 K00147),K12657) K00286	1	TRUE	K00286,K00931,K00147	68,658,429,586,363,900,000,000,000	None
97	WATER_Bin_00013	M00133	Polyamine biosynthesis, arginine => agmatine => putrescine => spermidine	Pathway modules	Amino acid metabolism	Polyamine biosynthesis	(K01583,K01584,K01585,K02626) K01480 K01611 K00797	0.5	FALSE	K01480,K01584	2,988,047,591	None
98	WATER_Bin_00013	M00136	GABA biosynthesis, prokaryotes, putrescine => GABA	Pathway modules	Amino acid metabolism	Polyamine biosynthesis	K09470 K09471 K09472 K09473	0.25	FALSE	K09472	4,396,556,904	None
99	WATER_Bin_00013	M00026	Histidine biosynthesis, PRPP => histidine	Pathway modules	Amino acid metabolism	Histidine metabolism	(K00765-K02502) (K01523 K01496,K11755,K14152) (K01814,K24017) (K02501+K02500,K01663) ((K01693 K00817 (K04486,K05602,K18649)),(K01089 K00817)) (K00013,K14152)	0.625	FALSE	K00817,K01814,K02500,K02501,K01523,K00765,K02502	23,696,994,221,564,200,000,000,000,000,000,000,000,000,000	None
100	WATER_Bin_00013	M00022	Shikimate pathway, phosphoenolpyruvate + erythrose-4P => chorismate	Pathway modules	Amino acid metabolism	Aromatic amino acid metabolism	(K01626,K03856,K13853) (((K01735,K13829) ((K03785,K03786) K00014,K13832)),K13830) ((K00891,K13829) (K00800,K24018),K13830) K01736	1	TRUE	K01736,K01735,K01626,K00891,K00014,K03786,K00800	267,862,880,531,373,000,000,000,000,000,000,000,000,000,000,000,000,000,000	None
101	WATER_Bin_00013	M00023	Tryptophan biosynthesis, chorismate => tryptophan	Pathway modules	Amino acid metabolism	Aromatic amino acid metabolism	(((K01657+K01658,K13503,K13501,K01656) K00766),K13497) (((K01817,K24017) (K01656,K01609)),K13498,K13501) (K01695+(K01696,K06001),K01694)	0.9	TRUE	K01658,K01817,K00766,K01695,K01696,K01609	110,952,058,642,813,000,000,000,000,000,000,000,000,000,000,000,000,000,000,000	None
102	WATER_Bin_00013	M00024	Phenylalanine biosynthesis, chorismate => phenylpyruvate => phenylalanine	Pathway modules	Amino acid metabolism	Aromatic amino acid metabolism	((K01850,K04092,K14187,K04093,K04516,K06208,K06209) (K01713,K04518,K05359),K14170) (K00832,K00838)	0.333333333	FALSE	K04518	27166	None
103	WATER_Bin_00013	M00025	Tyrosine biosynthesis, chorismate => HPP => tyrosine	Pathway modules	Amino acid metabolism	Aromatic amino acid metabolism	(((K01850,K04092,K14170,K04093,K04516,K06208,K06209) (K04517,K00211)),K14187) (K00832,K00838)	0.333333333	FALSE	K04517	2,716,523,697	None
104	WATER_Bin_00013	M00118	Glutathione biosynthesis, glutamate => glutathione	Pathway modules	Amino acid metabolism	Other amino acid metabolism	(K11204+K11205,K01919) (K21456,K01920)	1	TRUE	K01920,K01919	23,402,102,163,522	None
105	WATER_Bin_00013	M00076	Dermatan sulfate degradation	Pathway modules	Glycan metabolism	Glycosaminoglycan metabolism	#NULL!	0.166666667	FALSE	K01135	38690	'--' steps are assumed incomplete
106	WATER_Bin_00013	M00077	Chondroitin sulfate degradation	Pathway modules	Glycan metabolism	Glycosaminoglycan metabolism	K01135 K01197 K01195 K01132	0.25	FALSE	K01135	38690	None
107	WATER_Bin_00013	M00060	KDO2-lipid A biosynthesis, Raetz pathway, LpxL-LpxM type	Pathway modules	Glycan metabolism	Lipopolysaccharide metabolism	K00677 K02535 K02536 (K03269,K09949) K00748 K00912 K02527 K02517 K02560	0.444444444	FALSE	K02527,K02536,K03269,K00677	15,465,508,764,042,800,000	None
108	WATER_Bin_00013	M00866	KDO2-lipid A biosynthesis, Raetz pathway, non-LpxL-LpxM type	Pathway modules	Glycan metabolism	Lipopolysaccharide metabolism	K00677 (K02535,K16363) K02536 (K03269,K09949) K00748 K00912 K02527 K02517 K09778	0.444444444	FALSE	K02527,K02536,K03269,K00677	15,465,508,764,042,800,000	None
109	WATER_Bin_00013	M00063	CMP-KDO biosynthesis	Pathway modules	Glycan metabolism	Lipopolysaccharide metabolism	K06041 K01627 K03270 K00979	1	TRUE	K03270,K06041,K01627,K00979	729,372,923,022,848,000	None
110	WATER_Bin_00013	M00064	ADP-L-glycero-D-manno-heptose biosynthesis	Pathway modules	Glycan metabolism	Lipopolysaccharide metabolism	K03271 (K03272,K21344) K03273 (K03272,K21345) K03274	0.2	FALSE	K03271	46155	None
111	WATER_Bin_00013	M00127	Thiamine biosynthesis, prokaryotes, AIR (+ DXP/tyrosine) => TMP/TPP	Pathway modules	Metabolism of cofactors and vitamins	Cofactor and vitamin metabolism	K03148+K03154 K03151 K03150 K03149 K03147 ((K00941 K00788),K14153,K21219) K00946	0.5	FALSE	K00941,K00788,K03147,K00946	1,874,021,625,423,480,000,000,000	None
112	WATER_Bin_00013	M00895	Thiamine biosynthesis, prokaryotes, AIR (+ DXP/glycine) => TMP/TPP	Pathway modules	Metabolism of cofactors and vitamins	Cofactor and vitamin metabolism	K03148+K03154 K03151 K03153 K03149 K10810 K03147 K00941 K00788 K00946	0.444444444	FALSE	K00941,K00788,K03147,K00946	1,874,021,625,423,480,000,000,000	None
113	WATER_Bin_00013	M00896	Thiamine biosynthesis, archaea, AIR (+ NAD+) => TMP/TPP	Pathway modules	Metabolism of cofactors and vitamins	Cofactor and vitamin metabolism	K22699 K03147 (K00941 (K00788,K21220),K21219) K00946	0.8	TRUE	K00941,K00788,K03147,K00946	1,874,021,625,423,480,000,000,000	None
114	WATER_Bin_00013	M00897	Thiamine biosynthesis, plants, AIR (+ NAD+) => TMP/thiamine/TPP	Pathway modules	Metabolism of cofactors and vitamins	Cofactor and vitamin metabolism	K03146 K03147 K14153 K22911 K00949	0.2	FALSE	K03147	42348	None
115	WATER_Bin_00013	M00899	Thiamine salvage pathway, HMP/HET => TMP	Pathway modules	Metabolism of cofactors and vitamins	Cofactor and vitamin metabolism	K00878 ((K00941 K00788),K14153,K21219)	1	TRUE	K00941,K00788,K00878	18,740,216,251,873,700,000	None
116	WATER_Bin_00013	M00125	Riboflavin biosynthesis, plants and bacteria, GTP => riboflavin/FMN/FAD	Pathway modules	Metabolism of cofactors and vitamins	Cofactor and vitamin metabolism	(K01497,K14652) (K01498 K00082,K11752) (K22912,K20860,K20861,K20862,K21063,K21064) (K02858,K14652) K00794 K00793 (K20884 K22949,K11753)	1	TRUE	K00793,K01497,K11753,K14652,K00794,K20862,K11752	2,821,132,972,122,680,000,000,000,000,000,000,000,000,000,000,000,000,000,000,000,000,000,000	None
117	WATER_Bin_00013	M00911	Riboflavin biosynthesis, fungi, GTP => riboflavin/FMN/FAD	Pathway modules	Metabolism of cofactors and vitamins	Cofactor and vitamin metabolism	K01497 K14654 K14655 -- K02858 K00794 K00793 K00861 K00953	0.333333333	FALSE	K00793,K01497,K00794	2,821,132,972,122,680,000,000,000,000,000,000,000,000	'--' steps are assumed incomplete
118	WATER_Bin_00013	M00124	Pyridoxal-P biosynthesis, erythrose-4P => pyridoxal-P	Pathway modules	Metabolism of cofactors and vitamins	Cofactor and vitamin metabolism	K03472 K03473 K00831 K00097 K03474 K00275	0.666666667	FALSE	K00831,K03474,K03473,K00275	236,945,460,157,250,000,000,000,000,000	None
119	WATER_Bin_00013	M00115	NAD biosynthesis, aspartate => quinolinate => NAD	Pathway modules	Metabolism of cofactors and vitamins	Cofactor and vitamin metabolism	(K00278,K06989) K03517 K00767 (K00969,K06210) (K01916,K01950)	0.8	TRUE	K00278,K00969,K01916,K03517	2,668,153,804,251,050,000	None
120	WATER_Bin_00013	M00912	NAD biosynthesis, tryptophan => quinolinate => NAD	Pathway modules	Metabolism of cofactors and vitamins	Cofactor and vitamin metabolism	(K00453,K00463) (K01432,K14263,K07130) K00486 K01556 K00452 K00767 (K00969,K06210) (K01916,K01950)	0.25	FALSE	K00969,K01916	538,042,510	None
121	WATER_Bin_00013	M00119	Pantothenate biosynthesis, valine/L-aspartate => pantothenate	Pathway modules	Metabolism of cofactors and vitamins	Cofactor and vitamin metabolism	K00826 K00606 K00077 K01579 (K01918,K13799)	0.8	TRUE	K01918,K00606,K00826,K01579	19,493,194,921,357,600,000,000,000,000,000,000	None
122	WATER_Bin_00013	M00913	Pantothenate biosynthesis, 2-oxoisovalerate/spermine => pantothenate	Pathway modules	Metabolism of cofactors and vitamins	Cofactor and vitamin metabolism	K00606 K00077 K13367 K00128 K01918	0.4	FALSE	K01918,K00606	19,493,194,924,842,200,000	None
123	WATER_Bin_00013	M00120	Coenzyme A biosynthesis, pantothenate => CoA	Pathway modules	Metabolism of cofactors and vitamins	Cofactor and vitamin metabolism	(K00867,K03525,K01947,K09680) ((K01922,K21977) K01598,K13038) (K02318,(K00954,K02201) K00859)	1	TRUE	K00954,K00859,K13038,K03525	751,558,982,582,124,000,000,000	None
124	WATER_Bin_00013	M00914	Coenzyme A biosynthesis, archaea, 2-oxoisovalerate => 4-phosphopantoate => CoA	Pathway modules	Metabolism of cofactors and vitamins	Cofactor and vitamin metabolism	K00606 K00077 K06982 K09722 K13038 K02201 K09735	0.285714286	FALSE	K00606,K13038	19,492,582,124,842,200,000	None
125	WATER_Bin_00013	M00572	Pimeloyl-ACP biosynthesis, BioC-BioH pathway, malonyl-ACP => pimeloyl-ACP	Pathway modules	Metabolism of cofactors and vitamins	Cofactor and vitamin metabolism	K02169 (K00647,K09458) K00059 K02372 K00208 (K02170,K09789,K19560,K19561)	0.5	FALSE	K09458,K00647,K02372,K00059	411,051,231,508,774,000	None
126	WATER_Bin_00013	M00123	Biotin biosynthesis, pimeloyl-ACP/CoA => biotin	Pathway modules	Metabolism of cofactors and vitamins	Cofactor and vitamin metabolism	K00652 ((K00833,K19563) K01935,K19562) K01012	0.25	FALSE	K00833	3,173,731,738	None
127	WATER_Bin_00013	M00577	Biotin biosynthesis, BioW pathway, pimelate => pimeloyl-CoA => biotin	Pathway modules	Metabolism of cofactors and vitamins	Cofactor and vitamin metabolism	K01906 K00652 (K00833,K19563) K01935 K01012	0.2	FALSE	K00833	3,173,731,738	None
128	WATER_Bin_00013	M00126	Tetrahydrofolate biosynthesis, GTP => THF	Pathway modules	Metabolism of cofactors and vitamins	Cofactor and vitamin metabolism	(K01495,K09007,K22391) (K01077,K01113,(K08310,K19965)) ((K13939,(K13940,K01633 K00950) K00796),(K01633 K13941)) (K11754,K20457) (K00287,K13998)	0.571428571	FALSE	K00287,K00796,K00950,K01495,K22391	2,331,347,390,390,830,000,000,000,000,000,000,000,000	None
129	WATER_Bin_00013	M00840	Tetrahydrofolate biosynthesis, mediated by ribA and trpF, GTP => THF	Pathway modules	Metabolism of cofactors and vitamins	Cofactor and vitamin metabolism	K14652 K22100 -- K01633 K13941 K22099 K00287	0.285714286	FALSE	K00287,K14652	23,313,473,904,896,900,000	'--' steps are assumed incomplete
130	WATER_Bin_00013	M00841	Tetrahydrofolate biosynthesis, mediated by PTPS, GTP => THF	Pathway modules	Metabolism of cofactors and vitamins	Cofactor and vitamin metabolism	K01495 K22101 K13941 K11754 K13998	0.2	FALSE	K01495	49861	None
131	WATER_Bin_00013	M00842	Tetrahydrobiopterin biosynthesis, GTP => BH4	Pathway modules	Metabolism of cofactors and vitamins	Cofactor and vitamin metabolism	K01495 K01737 K00072	0.666666667	FALSE	K01737,K01495	558,265,084,749,861	None
132	WATER_Bin_00013	M00843	L-threo-Tetrahydrobiopterin biosynthesis, GTP => L-threo-BH4	Pathway modules	Metabolism of cofactors and vitamins	Cofactor and vitamin metabolism	K01495 K01737 K17745	0.666666667	FALSE	K01737,K01495	558,265,084,749,861	None
133	WATER_Bin_00013	M00880	Molybdenum cofactor biosynthesis, GTP => molybdenum cofactor	Pathway modules	Metabolism of cofactors and vitamins	Cofactor and vitamin metabolism	((K03639 K03637),K20967) (K03635,K21142) (((K03831,K03638) K03750),K15376)	0.6	FALSE	K03638,K03750,K03639	825,410,754,598,255,000,000,000	None
134	WATER_Bin_00013	M00140	C1-unit interconversion, prokaryotes	Pathway modules	Metabolism of cofactors and vitamins	Cofactor and vitamin metabolism	K00600 (K01491,(K00300 K01500)) K01938	0.333333333	FALSE	K00600	54781	None
135	WATER_Bin_00013	M00141	C1-unit interconversion, eukaryotes	Pathway modules	Metabolism of cofactors and vitamins	Cofactor and vitamin metabolism	K00600 (K00288,(K13403 K13402))	0.5	FALSE	K00600	54781	None
136	WATER_Bin_00013	M00846	Siroheme biosynthesis, glutamyl-tRNA => siroheme	Pathway modules	Metabolism of cofactors and vitamins	Cofactor and vitamin metabolism	K02492 K01845 K01698 K01749 (K01719,K13542,K13543) (K02302,(K00589,K02303,K02496,K13542,K13543)+K02304-K03794)	1	TRUE	K02496,K02492,K01845,K01719,K01749,K01698,K02304	24,079,835,712,377,200,000,000,000,000,000,000,000,000,000	None
137	WATER_Bin_00013	M00868	Heme biosynthesis, animals and fungi, glycine => heme	Pathway modules	Metabolism of cofactors and vitamins	Cofactor and vitamin metabolism	K00643 K01698 K01749 K01719 K01599 K00228 K00231 K01772	0.75	TRUE	K01719,K01772,K01599,K01749,K01698,K00228	240,784,923,044,287,000,000,000,000,000,000,000,000	None
138	WATER_Bin_00013	M00121	Heme biosynthesis, plants and bacteria, glutamate => heme	Pathway modules	Metabolism of cofactors and vitamins	Cofactor and vitamin metabolism	K01885 K02492 K01845 K01698 K01749 (K01719,K13542,K13543) K01599 (K00228,K02495) (K00230,K00231,K08973) K01772	0.8	TRUE	K02495,K02492,K01845,K01719,K01772,K01599,K01749,K01698,K00228	29,147,835,712,377,200,000,000,000,000,000,000,000,000,000,000,000,000,000,000,000,000,000	None
139	WATER_Bin_00013	M00926	Heme biosynthesis, bacteria, glutamyl-tRNA => coproporphyrin III => heme	Pathway modules	Metabolism of cofactors and vitamins	Cofactor and vitamin metabolism	K02492 K01845 K01698 K01749 (K01719,K13542) K01599 K00231 K01772 K00435	0.777777778	TRUE	K02492,K01845,K01719,K01772,K01599,K01749,K01698	835,712,377,216,242,000,000,000,000,000,000,000,000,000,000,000	None
140	WATER_Bin_00013	M00924	Cobalamin biosynthesis, anaerobic, uroporphyrinogen III => sirohydrochlorin => cobyrinate a,c-diamide	Pathway modules	Metabolism of cofactors and vitamins	Cofactor and vitamin metabolism	(K02302,(K02303,K13542) K02304) (K02190,K03795,K22011) K03394 (K05934,K13541,K21479) K05936 (K02189,K13541) K02188 K05895 (K02191 K03399,K00595) K06042 K02224	0.166666667	FALSE	K02224,K02304	5,787,262,932	None
141	WATER_Bin_00013	M00925	Cobalamin biosynthesis, aerobic, uroporphyrinogen III => precorrin 2 => cobyrinate a,c-diamide	Pathway modules	Metabolism of cofactors and vitamins	Cofactor and vitamin metabolism	(K02303,K13542) (K03394,K13540) K02229 (K05934,K13540,K13541) K05936 K02228 K05895 K00595 K06042 K02224 K02230+K09882+K09883	0.090909091	FALSE	K02224	57872	None
142	WATER_Bin_00013	M00122	Cobalamin biosynthesis, cobyrinate a,c-diamide => cobalamin	Pathway modules	Metabolism of cofactors and vitamins	Cofactor and vitamin metabolism	(K00798,K19221) K02232 (K02225,K02227) K02231 K00768 (K02226,K22316) K02233	0.142857143	FALSE	K02232	62931	None
143	WATER_Bin_00013	M00117	Ubiquinone biosynthesis, prokaryotes, chorismate (+ polyprenyl-PP) => ubiquinol	Pathway modules	Metabolism of cofactors and vitamins	Cofactor and vitamin metabolism	(K03181,K18240) K03179 (K03182+K03186) K18800 K00568 K03185 K03183 K03184 K00568	0.333333333	FALSE	K03179,K03183,K03182,K03186	16,569,209,174,874,900,000,000,000,000,000	None
144	WATER_Bin_00013	M00116	Menaquinone biosynthesis, chorismate (+ polyprenyl-PP) => menaquinol	Pathway modules	Metabolism of cofactors and vitamins	Cofactor and vitamin metabolism	K02552 K02551 K08680 K02549 K01911 K01661 K19222 K02548 K03183	0.222222222	FALSE	K03183,K02548	209,174,233,633,072	None
145	WATER_Bin_00013	M00095	C5 isoprenoid biosynthesis, mevalonate pathway	Pathway modules	Biosynthesis of terpenoids and polyketides	Terpenoid backbone biosynthesis	K00626 K01641 K00021 K00869 (K00938,K13273) K01597 K01823	0.714285714	FALSE	K00021,K01641,K00626,K00869,K01597	3,058,817,295,157,210,000,000,000,000,000,000,000,000	None
146	WATER_Bin_00013	M00849	C5 isoprenoid biosynthesis, mevalonate pathway, archaea	Pathway modules	Biosynthesis of terpenoids and polyketides	Terpenoid backbone biosynthesis	K00626 K01641 (K00021,K00054) ((K00869 K17942),(K18689 K18690 K22813)) K06981 K01823	0.571428571	FALSE	K00021,K01641,K00626,K00869	30,588,172,951,572,100,000,000,000,000,000,000	None
147	WATER_Bin_00013	M00096	C5 isoprenoid biosynthesis, non-mevalonate pathway	Pathway modules	Biosynthesis of terpenoids and polyketides	Terpenoid backbone biosynthesis	K01662 K00099 (K00991,K12506) K00919 (K01770,K12506) K03526 K03527 K01823	0.125	FALSE	K01662	44088	None
148	WATER_Bin_00013	M00364	C10-C20 isoprenoid biosynthesis, bacteria	Pathway modules	Biosynthesis of terpenoids and polyketides	Terpenoid backbone biosynthesis	K01823 (K00795,K13789,K13787)	0.5	FALSE	K13789,K00795	44087	None
149	WATER_Bin_00013	M00366	C10-C20 isoprenoid biosynthesis, plants	Pathway modules	Biosynthesis of terpenoids and polyketides	Terpenoid backbone biosynthesis	K01823 K14066 K00787 K13789	0.25	FALSE	K13789	44087	None
150	WATER_Bin_00013	M00778	Type II polyketide backbone biosynthesis, acyl-CoA + malonyl-CoA => polyketide	Pathway modules	Biosynthesis of terpenoids and polyketides	Type II polyketide biosynthesis	K05551+K05552+K05553 -K12420 ((K05554,K14249,K15884,K15885) (K05555,K14250),K15886)	0.333333333	FALSE	K05555	54,644,600,913,435,100,000	No KOfam profile for K14249,No KOfam profile for K15886
151	WATER_Bin_00013	M00793	dTDP-L-rhamnose biosynthesis	Pathway modules	Biosynthesis of terpenoids and polyketides	Polyketide sugar unit biosynthesis	K00973 K01710 (K01790 K00067,K23987)	0.25	FALSE	K00067	60375	None
152	WATER_Bin_00013	M00039	Monolignol biosynthesis, phenylalanine/tyrosine => monolignol	Pathway modules	Biosynthesis of other secondary metabolites	Biosynthesis of phytochemical compounds	(K10775,K13064) K00487 K01904 K13065 K09754 K00588 K09753 K09755 K13066 (K00083,K22395)	0.1	FALSE	K00588	3580	None
153	WATER_Bin_00013	M00848	Aurachin biosynthesis, anthranilate => aurachin A	Pathway modules	Biosynthesis of other secondary metabolites	Biosynthesis of other antibiotics	K09460 K02078+K14245+K14246+K22798 K22799 K22800 K21272 K21271 K22801 K22802	0.03125	FALSE	K02078	4111	No KOfam profile for K09460,No KOfam profile for K14245,No KOfam profile for K14246,No KOfam profile for K22798,No KOfam profile for K22799,No KOfam profile for K22800,No KOfam profile for K21272,No KOfam profile for K21271,No KOfam profile for K22801,No KOfam profile for K22802
154	WATER_Bin_00013	M00878	Phenylacetate degradation, phenylaxetate => acetyl-CoA/succinyl-CoA	Pathway modules	Xenobiotics biodegradation	Aromatics degradation	K01912 K02609+K02610+K02611+K02612+K02613 K15866 K02618 K02615 K01692 K00074	0.428571429	FALSE	K02609,K02610,K01912,K02612,K02613,K15866,K02611	58,358,410,620,649,000,000,000,000,000	None
155	WATER_Bin_00013	M00744	Cationic antimicrobial peptide (CAMP) resistance, protease PgtE	Signature modules	Gene set	Drug resistance	K07637 K07660 K08477	0.333333333	FALSE	K07637	33592	None
156	WATER_Bin_00013	M00611	Oxygenic photosynthesis in plants and cyanobacteria	Signature modules	Module set	Metabolic capacity	(M00161,M00163) M00165	0.454545455	FALSE	K03841,K00615,K00855,K01807,K00134,K01601,K01624,K00927	301,842,647,214,101,000,000,000,000,000,000,000,000,000,000,000,000,000,000,000,000,000,000,000,000	No KOfam profile for M00161,No KOfam profile for M00163,No KOfam profile for M00165
157	WATER_Bin_00013	M00612	Anoxygenic photosynthesis in purple bacteria	Signature modules	Module set	Metabolic capacity	M00597 M00165	0.454545455	FALSE	K03841,K00615,K00855,K01807,K00134,K01601,K01624,K00927	301,842,647,214,101,000,000,000,000,000,000,000,000,000,000,000,000,000,000,000,000,000,000,000,000	No KOfam profile for M00165,No KOfam profile for M00597
158	WATER_Bin_00013	M00613	Anoxygenic photosynthesis in green nonsulfur bacteria	Signature modules	Module set	Metabolic capacity	M00597 M00376	0.054487179	FALSE	K00242,K00240,K00241,K01676,K02160,K01962,K01963	7,239,246,697,238,650,000,000,000,000,000,000,000,000,000	No KOfam profile for M00597,No KOfam profile for M00376
159	WATER_Bin_00013	M00614	Anoxygenic photosynthesis in green sulfur bacteria	Signature modules	Module set	Metabolic capacity	M00598 M00173	0.25	FALSE	K00242,K00240,K00241,K03737,K01682,K01595,K00024,K01676	723,924,669,723,814,000,000,000,000,000,000,000,000,000,000	No KOfam profile for M00598,No KOfam profile for M00173
160	WATER_Bin_00013	M00617	Methanogen	Signature modules	Module set	Metabolic capacity	M00567,M00357,M00356,M00563	0.025	FALSE	K14083,K00202	5,468,934,058,270,850,000,000,000	None
161	WATER_Bin_00013	M00615	Nitrate assimilation	Signature modules	Module set	Metabolic capacity	(K02575,K15576+K15577+K15578-K15579) M00531	0.5	FALSE	K02575	121,851,925,619,257	No KOfam profile for M00531
162	WATER_Bin_00013	M00616	Sulfate-sulfur assimilation	Signature modules	Module set	Metabolic capacity	(K02048,K23163)+K02046+K02047+K02045 M00176	0.166666667	FALSE	K00957,K00381	5,287,359,883	No KOfam profile for M00176
